# Supplementary material for: The energetics of N2 reduction by vanadium containing nitrogenase
Source: Royal Society of Chemistry journal article supplement (doi:10.1039/d3cp04698b), 2023-12-14
Supplement: d3cp04698b1.pdf [file d3cp04698b1.pdf]

Supporting information to:

## The Energetics of N<sub>2</sub> Reduction by Vanadium Containing Nitrogenase

Per E. M. Siegbahn<sup>\*a</sup>, Wen-Jie Wei<sup>a,b</sup>

<sup>a</sup>Department of Organic Chemistry, Arrhenius Laboratory, Stockholm University, SE-106 91, Stockholm, Sweden

<sup>b</sup>Key Laboratory of Material Chemistry for Energy Conversion and Storage, Ministry of Education, Hubei Key Laboratory of Bioinorganic Chemistry and Materia Medica, Hubei Key Laboratory of Materials Chemistry and Service Failure, School of Chemistry and Chemical Engineering, Huazhong University of Science and Technology, Wuhan 430074, China

\*Corresponding author: [per.siegbahn@su.se](mailto:per.siegbahn@su.se)

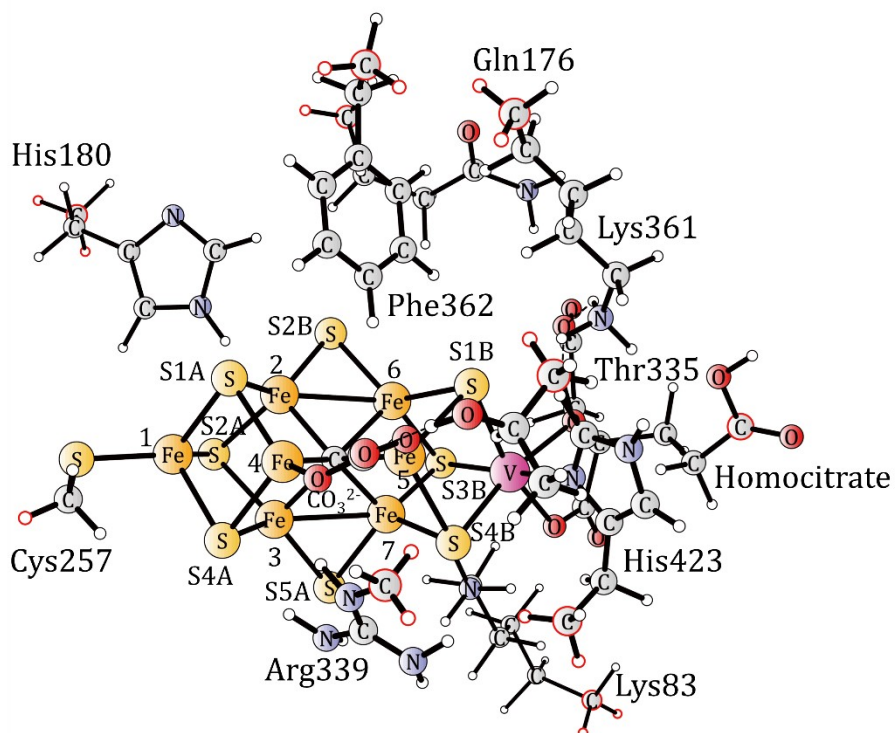

**Figure S1.** The model used for the present study. Atoms marked with red circles were fixed at their X-ray structure positions during the geometry optimizations.

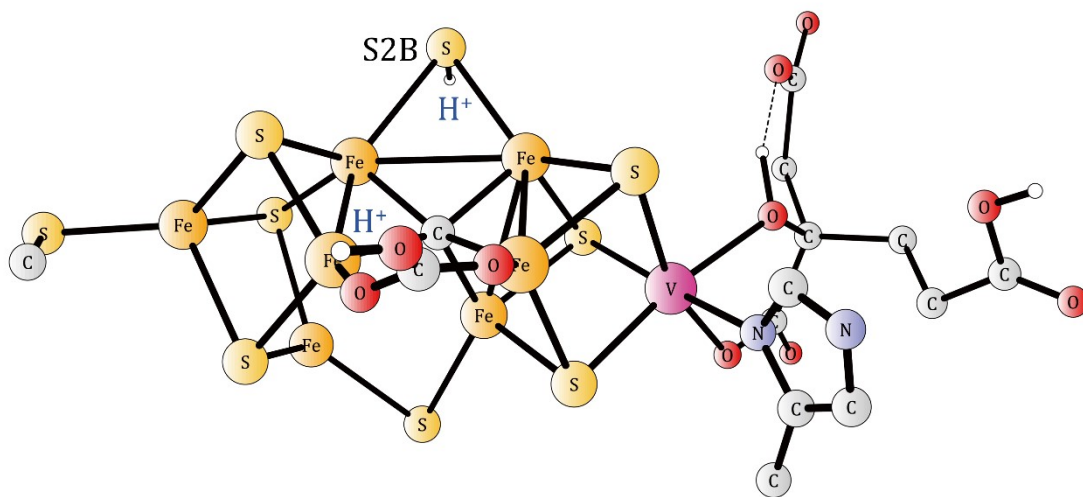

**Figure S2.** The optimized structure of  $A_2$ . For clarity, only the core of the model is shown. For the full model, see Figure S1.

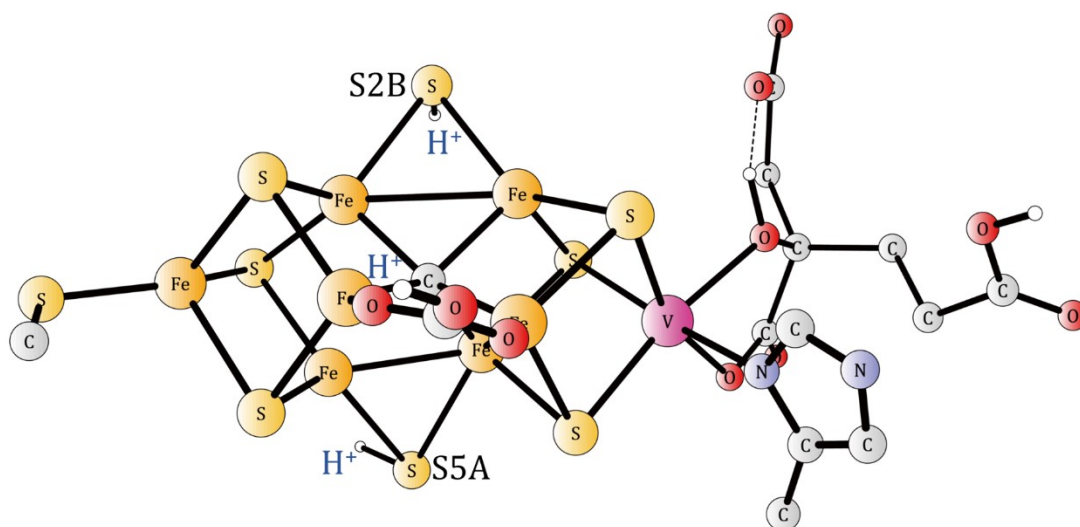

**Figure S3.** The optimized structure of  $A_3$ . For clarity, only the core of the model is shown. For the full model, see Figure S1.

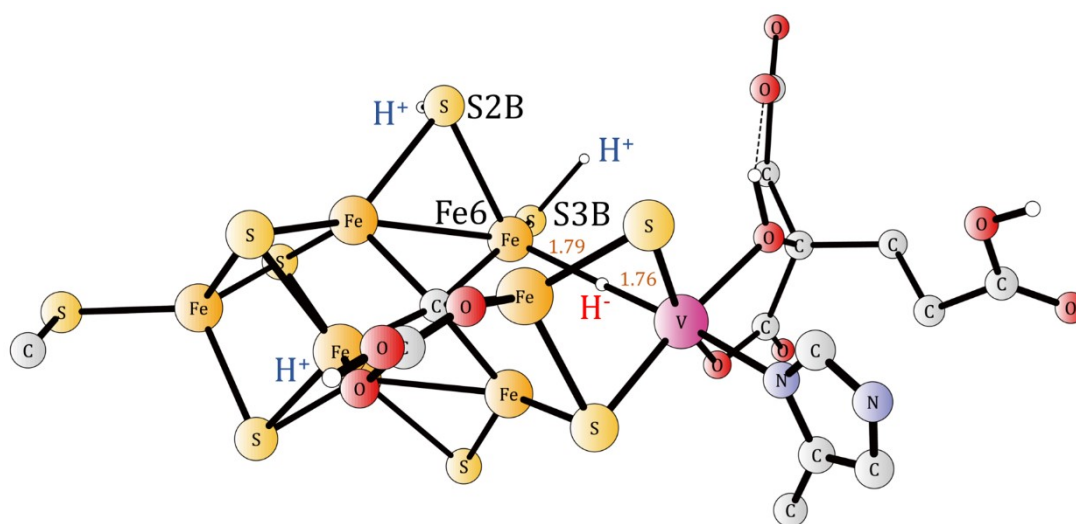

**Figure S4.** The optimized structure of  $A_4$ . For clarity, only the core of the model is shown. For the full model, see Figure S1.

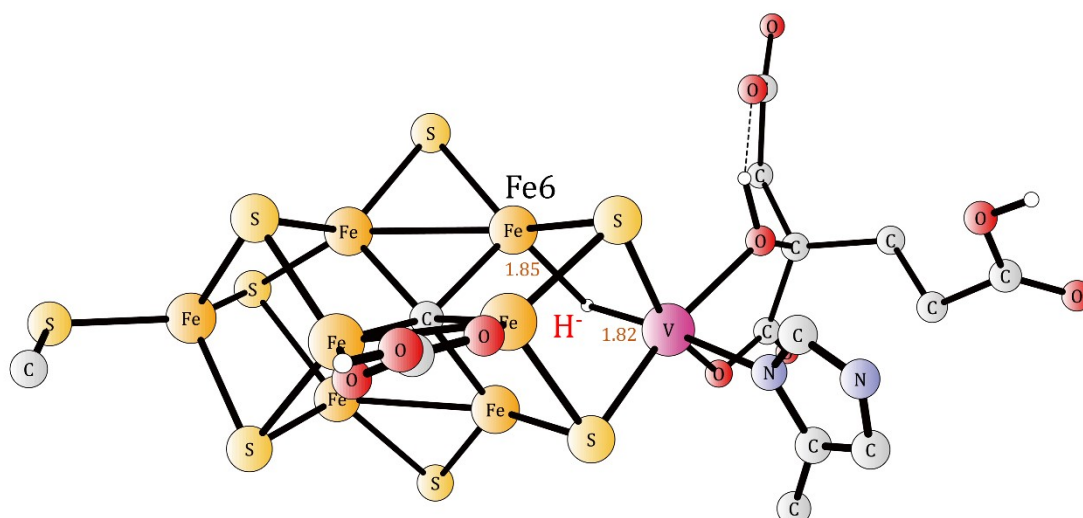

**Figure S5.** The optimized structure of  $A_4'$ . For clarity, only the core of the model is shown. For the full model, see Figure S1.

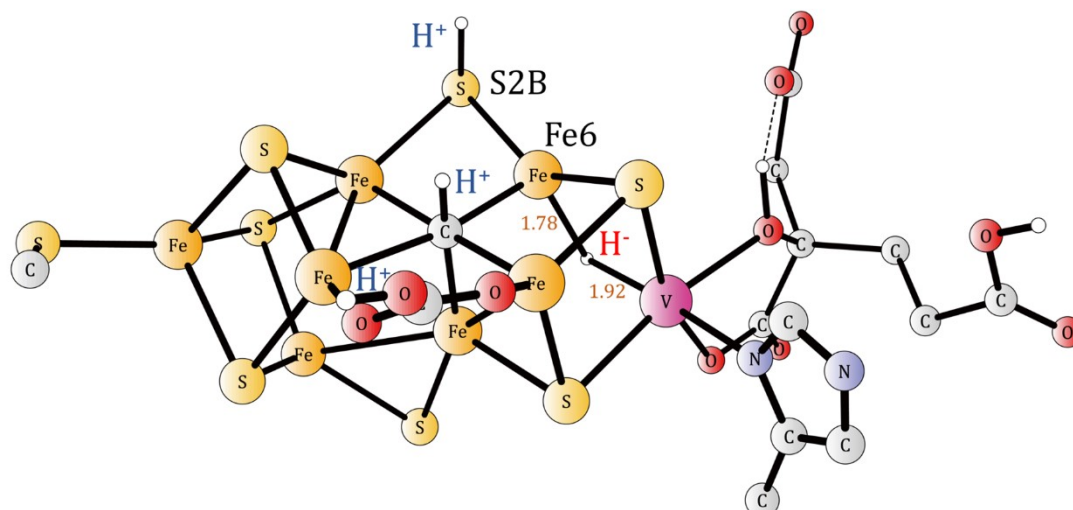

**Figure S6.** The optimized structure of  $E_1$ . For clarity, only the core of the model is shown. For the full model, see Figure S1.

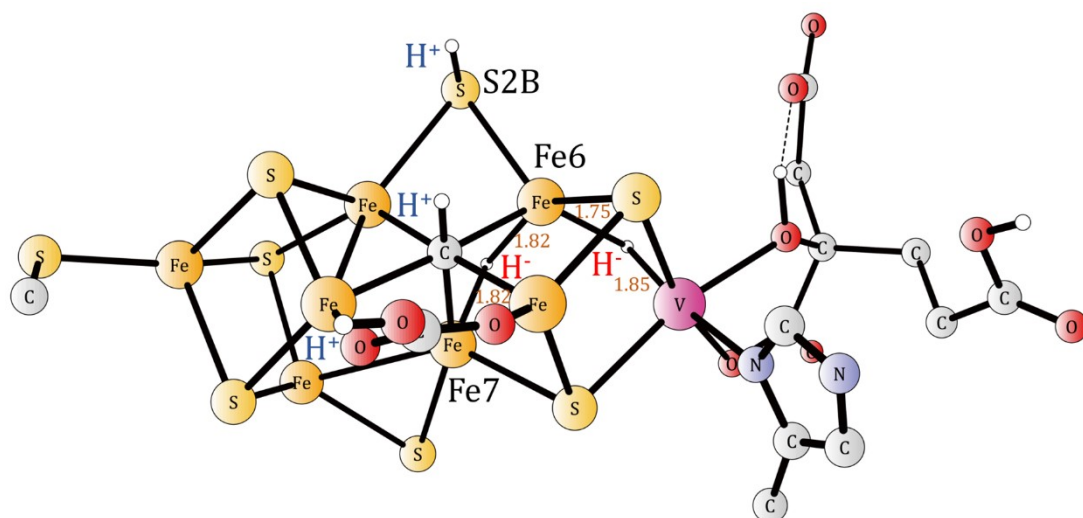

**Figure S7.** The optimized structure of  $E_2$ . For clarity, only the core of the model is shown. For the full model, see Figure S1.

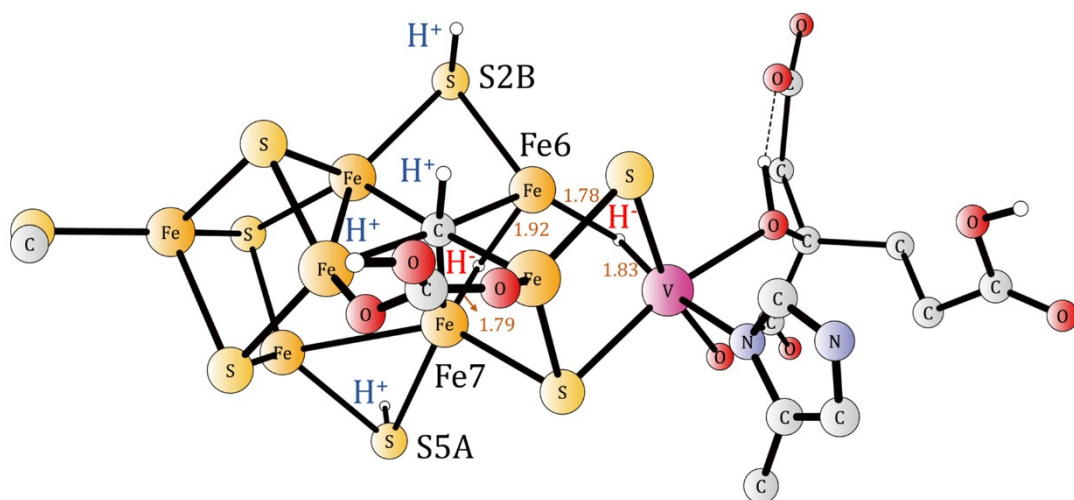

**Figure S8.** The optimized structure of  $E_3$ . For clarity, only the core of the model is shown. For the full model, see Figure S1.

## Coordinates for all structures:

**A<sub>0</sub>:**

E=-7814.105458 solv=-0.118032 disp=-228.01 Z0=885.95

|    |                |               |               |
|----|----------------|---------------|---------------|
| V  | 99.6843637246  | 62.5161944316 | 7.2469784738  |
| Fe | 104.7716979715 | 59.5874295974 | 1.9747425135  |
| Fe | 102.4155051467 | 61.3384542517 | 2.4438961529  |
| Fe | 104.3475384268 | 60.9696158300 | 4.5870534818  |
| Fe | 102.6021833964 | 58.9596262985 | 3.8044641450  |
| Fe | 100.5799896938 | 60.0622044461 | 5.4970685284  |
| Fe | 100.7929869307 | 62.5311446660 | 4.2018107330  |
| Fe | 102.4908274864 | 61.9634632365 | 6.1407782551  |
| C  | 102.2507439533 | 60.9128916179 | 4.4387774655  |
| S  | 104.9014964347 | 58.7319342455 | 4.2913297811  |
| S  | 104.7202378199 | 61.9889181540 | 6.5687057804  |
| S  | 104.7819938939 | 61.8992770445 | 2.4661546998  |
| S  | 102.3883904950 | 59.2277002161 | 1.5117313872  |
| S  | 101.0643798443 | 63.0331098453 | 2.0473710639  |
| S  | 98.7856068282  | 61.7422988038 | 5.1825346811  |
| S  | 101.2797840890 | 60.8128798150 | 7.7343344612  |
| C  | 100.4294689608 | 57.3105381998 | 5.0169329493  |
| O  | 101.7191798003 | 57.5220301937 | 4.7181113914  |
| O  | 99.7194163034  | 58.3768333207 | 5.3223057459  |
| O  | 99.9674375725  | 56.1653203737 | 5.0671161058  |
| C  | 97.8137577371  | 66.4164667985 | 5.6561458477  |
| C  | 98.7712531698  | 66.3845742717 | 6.8796872805  |
| C  | 98.4622966192  | 65.2698286448 | 7.9249677724  |
| C  | 97.2214514417  | 65.6661140428 | 8.7556259304  |
| C  | 96.7658166040  | 64.5738202612 | 9.7587698752  |
| C  | 95.2679301067  | 64.4454875808 | 9.8432462647  |
| C  | 99.6735540898  | 64.9919680345 | 8.8438803449  |
| O  | 97.3000848654  | 65.2560546321 | 5.3429429783  |
| O  | 97.6365778120  | 67.4584738070 | 5.0292155903  |
| O  | 94.7368418157  | 63.9784095482 | 8.6553513406  |
| O  | 94.5471819267  | 64.6918178462 | 10.7805749757 |
| O  | 100.1098229024 | 63.7614385611 | 8.8092769333  |
| O  | 100.1690009655 | 65.8827687457 | 9.5369040120  |
| O  | 98.1919974977  | 64.0346128673 | 7.2341641793  |
| H  | 97.8682786931  | 64.4007391427 | 6.2816293948  |
| H  | 99.7743036223  | 66.2173537457 | 6.4705627644  |
| H  | 98.7737470561  | 67.3635871345 | 7.3636532155  |
| H  | 97.4438448175  | 66.5930380141 | 9.2921133752  |

|   |                |               |               |
|---|----------------|---------------|---------------|
| H | 96.4180887814  | 65.8862163350 | 8.0437493546  |
| H | 97.1586456786  | 63.6047522510 | 9.4343758436  |
| H | 97.1400813123  | 64.7780885351 | 10.7638008358 |
| C | 106.5349855467 | 56.8890771769 | 1.3248933370  |
| H | 105.7701827211 | 56.2216189946 | 0.9175920699  |
| H | 106.4732910530 | 56.8859159758 | 2.4156322988  |
| S | 106.3303165392 | 58.5952726162 | 0.6540346138  |
| C | 93.8072701759  | 61.0298119949 | 1.8673687043  |
| C | 93.6557869026  | 61.1382765269 | 3.3853066040  |
| C | 94.6639710597  | 62.1747318228 | 3.8993155331  |
| C | 94.5650035689  | 62.4517910893 | 5.3916100589  |
| N | 95.7766925269  | 63.1865119771 | 5.8665521860  |
| C | 93.0790262916  | 59.8959601518 | 1.1410743922  |
| H | 94.8748944474  | 60.9393406456 | 1.6384148114  |
| H | 93.4954295726  | 61.9860931742 | 1.4234404799  |
| H | 93.8557507145  | 60.1673890696 | 3.8618077941  |
| H | 92.6271125657  | 61.4195465272 | 3.6577746977  |
| H | 95.6730827276  | 61.8104444999 | 3.6709644175  |
| H | 94.5472878114  | 63.1162030172 | 3.3460288242  |
| H | 94.5155606616  | 61.5215887971 | 5.9674098115  |
| H | 93.6902801807  | 63.0565980624 | 5.6499944016  |
| H | 95.7464244607  | 63.3734463187 | 6.8777606700  |
| H | 96.6450144672  | 62.6440743309 | 5.6685211890  |
| H | 95.9644871112  | 64.1106615280 | 5.4084157089  |
| H | 91.9880005441  | 59.9542820977 | 1.2423894473  |
| H | 93.4048998749  | 58.9145809255 | 1.4526838954  |
| C | 100.0989993722 | 60.0520006882 | 10.8889971414 |
| C | 99.2117314332  | 61.2986675822 | 10.6693747094 |
| C | 98.0906582282  | 61.0405488249 | 9.7216324868  |
| N | 98.1727702199  | 61.2794652068 | 8.3589847391  |
| C | 96.9122514338  | 60.3888503429 | 9.9906564471  |
| C | 97.0901998952  | 60.7406901506 | 7.8186614387  |
| N | 96.2889777676  | 60.2122002405 | 8.7727466799  |
| H | 100.7720111485 | 59.8784109732 | 10.1700238211 |
| H | 99.4702486510  | 59.1607711070 | 11.0148476811 |
| H | 100.5712426859 | 60.2159538231 | 11.7550862052 |
| H | 98.7874567378  | 61.5848988848 | 11.6409715471 |
| H | 99.8113647624  | 62.1413069349 | 10.3201262627 |
| H | 96.4882413430  | 60.0261159845 | 10.9141264409 |
| H | 95.4581482357  | 59.6650593474 | 8.5992411672  |
| H | 96.8997972982  | 60.6620367882 | 6.7602093606  |
| C | 101.6500025389 | 56.1420054418 | 7.7050016303  |
| N | 102.7972346868 | 56.9715864745 | 7.3277852237  |
| C | 103.3724300048 | 57.9106413205 | 8.0707709051  |

|   |                |               |               |
|---|----------------|---------------|---------------|
| N | 102.9790392555 | 58.0940729945 | 9.3617772563  |
| N | 104.4227450443 | 58.6045433118 | 7.6032544178  |
| H | 101.6884207489 | 55.2561276541 | 7.0665605298  |
| H | 100.7886343054 | 56.5995587611 | 7.4843451435  |
| H | 101.6262276989 | 55.8261440367 | 8.6535096721  |
| H | 102.8638407537 | 57.0886977511 | 6.3107988778  |
| H | 103.4052784143 | 58.8803691854 | 9.8351721620  |
| H | 101.9845974073 | 58.0186964066 | 9.5368892102  |
| H | 104.7010855359 | 58.4387212250 | 6.6309571071  |
| H | 104.4947730369 | 59.5963430391 | 7.8367379721  |
| C | 104.8710010092 | 65.5940003429 | -4.0429952020 |
| C | 104.5977882444 | 64.0958746161 | -3.7875974990 |
| C | 103.8574728621 | 63.8372868785 | -2.5184989178 |
| N | 102.4774412733 | 63.8724983512 | -2.4752643510 |
| C | 104.3677030188 | 63.6138335153 | -1.2608709148 |
| C | 102.1638211956 | 63.6659556588 | -1.2112850891 |
| N | 103.2718970281 | 63.5150567038 | -0.4342697201 |
| H | 105.4142233498 | 65.9758308032 | -3.2952586640 |
| H | 103.9334197111 | 66.1520155461 | -4.1361855811 |
| H | 105.3923872023 | 65.6470937065 | -4.8946699562 |
| H | 105.5588345039 | 63.5632643744 | -3.7711570342 |
| H | 104.0206941877 | 63.6828874248 | -4.6238271333 |
| H | 105.3750643368 | 63.5108186623 | -0.8863481242 |
| H | 103.2805328359 | 63.3361537333 | 0.5617276633  |
| H | 101.1665241570 | 63.6006607933 | -0.8033209941 |
| C | 95.6299757486  | 57.4820324903 | 6.4910614856  |
| C | 97.0341376038  | 56.9677409711 | 6.8377511031  |
| O | 97.3216339370  | 55.9015785535 | 5.9515551305  |
| C | 97.1355831312  | 56.4781871022 | 8.2886824469  |
| H | 95.3135132810  | 58.3179992196 | 7.1296947918  |
| H | 98.1474811478  | 56.1070217753 | 8.4886026099  |
| H | 96.4381494221  | 55.6485696922 | 8.4585201869  |
| H | 96.9166477780  | 57.2752021713 | 9.0129474959  |
| H | 94.8947571273  | 56.6760354929 | 6.6059765251  |
| H | 98.2376751619  | 56.0156890039 | 5.6062251226  |
| H | 97.7535234201  | 57.7829667720 | 6.6843300531  |
| C | 98.4859997435  | 66.3580013373 | -1.7130007656 |
| C | 98.8231691461  | 65.6319119545 | -0.3927634838 |
| C | 98.2800052167  | 66.2636863121 | 0.8955831947  |
| C | 96.7992237537  | 66.0104075432 | 1.1774602728  |
| O | 96.0698370835  | 65.3316032808 | 0.4527050994  |
| N | 96.3200765437  | 66.6193611209 | 2.3065309105  |
| H | 98.7144619739  | 67.3289719419 | -1.6420951232 |
| H | 97.4191306883  | 66.2612454477 | -1.9445774250 |



|   |                |               |               |
|---|----------------|---------------|---------------|
| H | 99.0290070976  | 65.9401255110 | -2.4413702205 |
| H | 98.4816433968  | 64.5925328424 | -0.4457960874 |
| H | 99.9150479735  | 65.5904509591 | -0.2973516693 |
| H | 98.8430414742  | 65.8703516368 | 1.7540681389  |
| H | 98.4519281692  | 67.3498581918 | 0.9033236531  |
| H | 96.9177235746  | 66.9387305777 | 3.0700248128  |
| H | 95.3807804035  | 66.3531200581 | 2.5704625812  |
| C | 103.6859931043 | 68.3259923397 | 12.1929977521 |
| C | 104.4547619664 | 68.6471855981 | 10.8898700416 |
| C | 103.9162979280 | 67.9349574781 | 9.6453653034  |
| C | 103.7932097737 | 66.4126033832 | 9.7876751766  |
| C | 103.3095891955 | 65.8151477531 | 8.4759539280  |
| N | 102.8981984944 | 64.3846558686 | 8.5934824167  |
| H | 104.1085749458 | 67.5601823395 | 12.6777192921 |
| H | 102.6370768811 | 68.0813031541 | 11.9830053842 |
| H | 103.6948492432 | 69.1366815105 | 12.7784182588 |
| H | 104.4201627907 | 69.7272807838 | 10.6988127484 |
| H | 105.5175884582 | 68.4014599993 | 11.0250341365 |
| H | 102.9196789527 | 68.3339377794 | 9.4104537344  |
| H | 104.5563461297 | 68.1720331465 | 8.7838252165  |
| H | 104.7575158637 | 65.9706302798 | 10.0787780904 |
| H | 103.0670101014 | 66.1753516004 | 10.5747424094 |
| H | 102.4203164715 | 66.3379132548 | 8.1192855897  |
| H | 104.0723630996 | 65.8570247924 | 7.6935292299  |
| H | 103.6642034249 | 63.7493142188 | 8.8353062904  |
| H | 102.0846384310 | 64.2556810781 | 9.2187219496  |
| H | 102.5306185194 | 64.0824794155 | 7.6496497239  |
| H | 93.7708642326  | 63.9614799915 | 8.7947904614  |
| H | 95.6198512737  | 57.7972836219 | 5.4686068333  |
| H | 93.3471302870  | 60.0483404823 | 0.1060382914  |
| H | 107.5224146324 | 56.5249256500 | 1.0242612098  |
| S | 101.3439196198 | 63.9953434230 | 5.9552851172  |
| H | 94.8291922960  | 59.8672858579 | -1.0815087559 |
| C | 95.2420434820  | 60.2379266224 | -2.0081033962 |
| H | 95.8060990000  | 59.4731290000 | -2.5212650000 |
| C | 96.2118299809  | 61.3953728499 | -1.6916354617 |
| C | 97.0972759701  | 61.0113701264 | -0.5243261502 |
| C | 97.8056214663  | 59.7985108629 | -0.5186743225 |
| C | 97.1330589761  | 61.8117585634 | 0.6233135961  |
| C | 98.4892744552  | 59.3707483160 | 0.6198302124  |
| C | 97.8183729061  | 61.3856873655 | 1.7621570368  |
| C | 98.4794090096  | 60.1561073292 | 1.7744681136  |
| H | 94.4259996474  | 60.5555671281 | -2.6694208907 |
| H | 96.8071389957  | 61.6300399477 | -2.5850926042 |

|   |               |               |               |
|---|---------------|---------------|---------------|
| H | 95.6629244716 | 62.3092943706 | -1.4379917365 |
| H | 96.6250904571 | 62.7744650631 | 0.6201203677  |
| H | 97.8129184471 | 59.1725069945 | -1.4081268021 |
| H | 97.8622845692 | 62.0264830769 | 2.6350309585  |
| H | 99.0022542037 | 59.8253282704 | 2.6660638054  |
| H | 99.0332380607 | 58.4304655675 | 0.6074036260  |

**A<sub>1</sub>:**

E=-7814.687452 solv=-0.120258 disp=-228.57 Z0=890.63

|    |                |               |               |
|----|----------------|---------------|---------------|
| V  | 99.6955737854  | 62.6062243714 | 7.2263027337  |
| Fe | 105.1675048128 | 59.8531056827 | 1.9663211455  |
| Fe | 102.7169006919 | 61.6100097650 | 2.5189775029  |
| Fe | 104.4794823278 | 61.0095175029 | 4.6699637631  |
| Fe | 102.6068753526 | 59.0614739052 | 3.6427319192  |
| Fe | 100.5916843743 | 60.1648964227 | 5.4142725516  |
| Fe | 100.8010575501 | 62.6905300544 | 4.1942279804  |
| Fe | 102.5058704146 | 62.0828919884 | 6.0796449461  |
| C  | 102.2701522020 | 61.1422666541 | 4.3854615354  |
| S  | 104.9680820945 | 58.8205375893 | 4.2682482237  |
| S  | 104.6939497286 | 62.0036947605 | 6.6936685306  |
| S  | 105.0170400060 | 62.1543162118 | 2.6611009677  |
| S  | 102.7025171885 | 59.6440961440 | 1.3510731203  |
| S  | 101.3070315766 | 63.5086983639 | 1.9891233181  |
| S  | 98.8026235069  | 61.8998094316 | 5.1140084477  |
| S  | 101.2734176482 | 60.9035570990 | 7.6668949552  |
| C  | 100.3085179042 | 57.5874434823 | 5.0522756797  |
| O  | 101.5945524633 | 57.9823416415 | 4.9060099454  |
| O  | 99.4788909894  | 58.5811491862 | 5.2472098528  |
| O  | 99.9951773352  | 56.3924211584 | 5.0766391138  |
| C  | 97.8391721853  | 66.5361914769 | 5.6957559151  |
| C  | 98.7731786065  | 66.4816833883 | 6.9380269211  |
| C  | 98.4584406031  | 65.3435038156 | 7.9562305054  |
| C  | 97.2118428156  | 65.7147774390 | 8.7897903437  |
| C  | 96.7642635694  | 64.6002865177 | 9.7731402577  |
| C  | 95.2679301346  | 64.4454876009 | 9.8432462381  |
| C  | 99.6645855733  | 65.0461210008 | 8.8773171374  |
| O  | 97.3181157565  | 65.3872915186 | 5.3574943864  |
| O  | 97.6903261985  | 67.5890220218 | 5.0778607857  |
| O  | 94.7554668172  | 63.9845561453 | 8.6447903334  |
| O  | 94.5347596418  | 64.6688852830 | 10.7768697965 |
| O  | 100.1024012519 | 63.8161599732 | 8.8187365112  |
| O  | 100.1508540314 | 65.9204644267 | 9.5961900332  |
| O  | 98.1944033052  | 64.1245844773 | 7.2355514850  |

|   |                |               |               |
|---|----------------|---------------|---------------|
| H | 97.8809941042  | 64.5073736385 | 6.2928797526  |
| H | 99.7845246317  | 66.3306810507 | 6.5433350624  |
| H | 98.7611847870  | 67.4505776469 | 7.4420148572  |
| H | 97.4239489622  | 66.6339164376 | 9.3435368627  |
| H | 96.4087214523  | 65.9397691312 | 8.0790476500  |
| H | 97.1758536517  | 63.6425245536 | 9.4386230224  |
| H | 97.1267668204  | 64.7965818537 | 10.7840156664 |
| C | 106.5542248090 | 57.0243425559 | 1.1450188063  |
| H | 105.8226934892 | 56.5448349994 | 0.4881866551  |
| H | 106.2321771919 | 56.9140079486 | 2.1835958722  |
| S | 106.7496382698 | 58.8093083043 | 0.7022798932  |
| C | 93.8347425033  | 61.0289061350 | 1.8484720820  |
| C | 93.7105180018  | 61.1636139268 | 3.3666400146  |
| C | 94.7237526516  | 62.2109891995 | 3.8514597950  |
| C | 94.6209679012  | 62.5197385929 | 5.3382026104  |
| N | 95.8187992638  | 63.2809901230 | 5.8054635442  |
| C | 93.0790262515  | 59.8959601555 | 1.1410743695  |
| H | 94.8984563481  | 60.9220560433 | 1.6024748225  |
| H | 93.5291054660  | 61.9833841272 | 1.3965098657  |
| H | 93.9170758892  | 60.2011526879 | 3.8569610092  |
| H | 92.6858768249  | 61.4497421275 | 3.6489091591  |
| H | 95.7337998447  | 61.8425276568 | 3.6317217277  |
| H | 94.6051507600  | 63.1397180534 | 3.2773600260  |
| H | 94.5844489636  | 61.6004680146 | 5.9320743739  |
| H | 93.7349829336  | 63.1142429869 | 5.5817306320  |
| H | 95.7997763981  | 63.4488726256 | 6.8205256924  |
| H | 96.7005363971  | 62.7640903487 | 5.5873906485  |
| H | 95.9790654508  | 64.2167368366 | 5.3641265743  |
| H | 91.9907791925  | 59.9674121358 | 1.2533118326  |
| H | 93.4048998871  | 58.9145809321 | 1.4526839044  |
| C | 100.0989993737 | 60.0520008091 | 10.8889970621 |
| C | 99.2218578746  | 61.3036411321 | 10.6486060546 |
| C | 98.1173961851  | 61.0570718720 | 9.6755630528  |
| N | 98.1993177311  | 61.3472416300 | 8.3214439634  |
| C | 96.9461582011  | 60.3813707651 | 9.9151554055  |
| C | 97.1254285873  | 60.8144428546 | 7.7586431186  |
| N | 96.3283321331  | 60.2424205242 | 8.6902973304  |
| H | 100.7720112040 | 59.8784109586 | 10.1700238655 |
| H | 99.4654981416  | 59.1641474642 | 11.0128040977 |
| H | 100.5712426720 | 60.2159537713 | 11.7550862226 |
| H | 98.7791898929  | 61.5950215819 | 11.6105720515 |
| H | 99.8337800040  | 62.1422974544 | 10.3111141991 |
| H | 96.5235974434  | 59.9802716862 | 10.8232767823 |
| H | 95.5044369649  | 59.6927772283 | 8.4945747103  |

|   |                |               |               |
|---|----------------|---------------|---------------|
| H | 96.9418208581  | 60.7667873059 | 6.6972398397  |
| C | 101.6500025575 | 56.1420056576 | 7.7050016543  |
| N | 102.7827136829 | 56.9821976316 | 7.3112721742  |
| C | 103.3481210398 | 57.9355402867 | 8.0464511044  |
| N | 102.9733823280 | 58.1115837718 | 9.3453081522  |
| N | 104.3713306129 | 58.6491501625 | 7.5590714098  |
| H | 101.6888187391 | 55.2540728314 | 7.0689355878  |
| H | 100.7886342881 | 56.5995586888 | 7.4843450607  |
| H | 101.6262277359 | 55.8261439710 | 8.6535096511  |
| H | 102.7862159741 | 57.1589551215 | 6.3001619149  |
| H | 103.3987852883 | 58.9007859989 | 9.8145405384  |
| H | 101.9843574466 | 58.0178448474 | 9.5401859393  |
| H | 104.6495291830 | 58.4887513763 | 6.5835484025  |
| H | 104.4472461162 | 59.6390296120 | 7.8021303195  |
| C | 104.8710010363 | 65.5940001655 | -4.0429948518 |
| C | 104.6529988246 | 64.0691737359 | -3.8759416615 |
| C | 103.7946250939 | 63.5737106783 | -2.7549644246 |
| N | 102.4747886734 | 63.9619792850 | -2.6096181415 |
| C | 104.0988589330 | 62.5878809055 | -1.8439581636 |
| C | 101.9982704651 | 63.2183316397 | -1.6306048410 |
| N | 102.9389334375 | 62.3659163284 | -1.1349504925 |
| H | 105.4142232874 | 65.9758310246 | -3.2952587316 |
| H | 103.9196899197 | 66.1260601834 | -4.1326664650 |
| H | 105.3923871666 | 65.6470936021 | -4.8946699846 |
| H | 105.6372911942 | 63.5879545402 | -3.7922878745 |
| H | 104.2224873810 | 63.6997544861 | -4.8195079773 |
| H | 105.0001916022 | 62.0248670664 | -1.6519150632 |
| H | 102.8120373519 | 61.6811355417 | -0.3977557896 |
| H | 100.9935118238 | 63.2579267704 | -1.2343135546 |
| C | 95.6299756841  | 57.4820324106 | 6.4910615233  |
| C | 97.0393626401  | 56.9932220544 | 6.8504625187  |
| O | 97.3629030741  | 55.9407468328 | 5.9577979286  |
| C | 97.1295773345  | 56.4886668897 | 8.2963639933  |
| H | 95.2861945555  | 58.3082415146 | 7.1282408425  |
| H | 98.1454703150  | 56.1352996777 | 8.5072609748  |
| H | 96.4461928025  | 55.6437986438 | 8.4470230309  |
| H | 96.8838195446  | 57.2728760761 | 9.0259529176  |
| H | 94.9092300127  | 56.6615598245 | 6.5980950753  |
| H | 98.2632838389  | 56.1051308133 | 5.5934617997  |
| H | 97.7419845000  | 57.8247228174 | 6.7134207609  |
| C | 98.4859995980  | 66.3580013543 | -1.7130008099 |
| C | 98.8230722763  | 65.6394242525 | -0.3882927684 |
| C | 98.3176522698  | 66.3088005490 | 0.8979003862  |
| C | 96.8352193013  | 66.1050165631 | 1.2131134520  |

|   |                |               |               |
|---|----------------|---------------|---------------|
| O | 96.0747916543  | 65.4258873862 | 0.5204301372  |
| N | 96.3919237064  | 66.7578100225 | 2.3315720198  |
| H | 98.7144620192  | 67.3289719310 | -1.6420951217 |
| H | 97.4186823055  | 66.2631909395 | -1.9432882401 |
| H | 99.0290071663  | 65.9401255045 | -2.4413701656 |
| H | 98.4515925559  | 64.6097894415 | -0.4196040455 |
| H | 99.9151682258  | 65.5677544115 | -0.3086317360 |
| H | 98.8836936111  | 65.9163014657 | 1.7549523527  |
| H | 98.5209794115  | 67.3893836161 | 0.8821578872  |
| H | 97.0072519262  | 67.0755079879 | 3.0816333691  |
| H | 95.4509428162  | 66.5226377831 | 2.6184554380  |
| C | 103.6859930662 | 68.3259923543 | 12.1929977138 |
| C | 104.4547232038 | 68.6420299532 | 10.8896056588 |
| C | 103.9288386207 | 67.9034246654 | 9.6553148842  |
| C | 103.8043934379 | 66.3840661576 | 9.8287633739  |
| C | 103.3325001865 | 65.7636603249 | 8.5240922967  |
| N | 102.8968090933 | 64.3419890999 | 8.6613632095  |
| H | 104.1085749484 | 67.5601822981 | 12.6777192244 |
| H | 102.6369259954 | 68.0818047038 | 11.9833487523 |
| H | 103.6948492606 | 69.1366815072 | 12.7784182631 |
| H | 104.4056208039 | 69.7188049211 | 10.6834424109 |
| H | 105.5202626536 | 68.4127237900 | 11.0322342392 |
| H | 102.9335419272 | 68.2956039403 | 9.4039457617  |
| H | 104.5755411202 | 68.1228602759 | 8.7941011923  |
| H | 104.7651316278 | 65.9470975051 | 10.1381590569 |
| H | 103.0700807452 | 66.1642592003 | 10.6132604375 |
| H | 102.4572393174 | 66.2912362870 | 8.1407971266  |
| H | 104.1064763013 | 65.7770802317 | 7.7518890853  |
| H | 103.6496469928 | 63.6966998909 | 8.9178356601  |
| H | 102.0709230264 | 64.2348872300 | 9.2742513102  |
| H | 102.5407017625 | 64.0387080579 | 7.7167443992  |
| H | 93.7889800638  | 63.9490768113 | 8.7768137158  |
| H | 95.6198512602  | 57.7972836104 | 5.4686068299  |
| H | 93.3471301038  | 60.0483401684 | 0.1060380945  |
| H | 107.5224146906 | 56.5249255576 | 1.0242611946  |
| H | 102.2697704975 | 64.3571820857 | 2.4189355736  |
| S | 101.3770733743 | 64.1393571677 | 5.9654152289  |
| H | 94.8291929030  | 59.8672864771 | -1.0815082439 |
| C | 95.2420431008  | 60.2379264318 | -2.0081037070 |
| H | 95.8060990000  | 59.4731290000 | -2.5212650000 |
| C | 96.1467577358  | 61.4569962123 | -1.7449415021 |
| C | 97.1412469332  | 61.1975184370 | -0.6318272541 |
| C | 97.9919540650  | 60.0802017576 | -0.6599692663 |
| C | 97.1940578927  | 62.0514569502 | 0.4774832008  |

|   |               |               |               |
|---|---------------|---------------|---------------|
| C | 98.8535343054 | 59.8064101437 | 0.4026728543  |
| C | 98.0502484303 | 61.7752121250 | 1.5471533297  |
| C | 98.8717126557 | 60.6465445060 | 1.5194569098  |
| H | 94.4072386866 | 60.5126178836 | -2.6668653034 |
| H | 96.6695170940 | 61.7226630265 | -2.6748485536 |
| H | 95.5386243806 | 62.3291927179 | -1.4788417607 |
| H | 96.5773649238 | 62.9476394297 | 0.4964059723  |
| H | 97.9810441319 | 59.4148369811 | -1.5205240217 |
| H | 98.0833902808 | 62.4462520686 | 2.3993134694  |
| H | 99.5289194423 | 60.4247534032 | 2.3539107047  |
| H | 99.5138192182 | 58.9449003966 | 0.3641336891  |

**A<sub>2</sub>:**

E=-7815.264388 solv=-0.126663 disp=-231.42 Z0=897.71

|    |                |               |              |
|----|----------------|---------------|--------------|
| V  | 99.5117314266  | 62.2083749550 | 7.2071695471 |
| Fe | 105.3045009822 | 59.7648352399 | 2.3949936206 |
| Fe | 102.8516149854 | 61.4286270020 | 2.9008481452 |
| Fe | 105.1188021487 | 60.9671165345 | 5.2523612598 |
| Fe | 102.7727913879 | 59.0836238056 | 3.8617598251 |
| Fe | 100.2227940051 | 59.7964582722 | 5.4377836717 |
| Fe | 100.5091634355 | 62.1658440127 | 4.1960229169 |
| Fe | 102.5196210146 | 61.4721732280 | 6.1447170259 |
| C  | 101.6870656874 | 60.6917886821 | 4.3919551668 |
| S  | 104.9143158395 | 58.6742969527 | 4.7104040220 |
| S  | 104.5862615377 | 61.7121371226 | 7.3634648466 |
| S  | 105.0397669512 | 62.1346374876 | 3.2353279183 |
| S  | 103.0585944066 | 59.4812923005 | 1.5616106977 |
| S  | 101.2425640386 | 63.1858343306 | 2.1264562257 |
| S  | 98.4303345891  | 61.4169879516 | 5.1760204422 |
| S  | 100.9485376220 | 60.3824247800 | 7.6395077637 |
| C  | 100.4564750769 | 57.1394761363 | 4.3944790194 |
| O  | 101.6921651407 | 57.3505897314 | 4.2372623785 |
| O  | 99.6252857011  | 57.8681949907 | 5.0133250860 |
| O  | 99.9468657597  | 55.9976908819 | 3.8856994636 |
| C  | 97.7796024401  | 66.2396515717 | 5.4884274032 |
| C  | 98.7654373565  | 66.1680020749 | 6.6878058534 |
| C  | 98.4247295597  | 65.0903841355 | 7.7573846322 |
| C  | 97.2168078279  | 65.5499394997 | 8.6072523164 |
| C  | 96.7616955211  | 64.5021233145 | 9.6579971999 |
| C  | 95.2679300914  | 64.4454875706 | 9.8432462851 |
| C  | 99.6376952097  | 64.7737079642 | 8.6647006063 |
| O  | 97.2520277728  | 65.0968775739 | 5.1445143307 |
| O  | 97.6020823788  | 67.3083153649 | 4.9008504219 |

|   |                |               |               |
|---|----------------|---------------|---------------|
| O | 94.6366158692  | 64.0074903941 | 8.6928385082  |
| O | 94.6223080669  | 64.7200829886 | 10.8263192415 |
| O | 99.9907289126  | 63.5219897629 | 8.6819666490  |
| O | 100.1944882806 | 65.6665821720 | 9.3107905649  |
| O | 98.0927031867  | 63.8555764436 | 7.0936655046  |
| H | 97.8410040165  | 64.1812016899 | 6.1379031454  |
| H | 99.7456494866  | 65.9277117785 | 6.2580974524  |
| H | 98.8415705193  | 67.1517780361 | 7.1554346701  |
| H | 97.4803417321  | 66.4857630517 | 9.1088213693  |
| H | 96.3989282003  | 65.7732156578 | 7.9126208823  |
| H | 97.0850604511  | 63.5090960566 | 9.3301390898  |
| H | 97.2106478313  | 64.7013778285 | 10.6329945402 |
| C | 106.6738013019 | 57.1224459320 | 1.3749833031  |
| H | 105.8269491635 | 56.9591094719 | 0.7020279869  |
| H | 106.4018945179 | 56.7883419632 | 2.3806315136  |
| S | 107.1701604119 | 58.9061337317 | 1.3890089754  |
| C | 93.8180202663  | 61.0235562929 | 1.8648198922  |
| C | 93.5923497498  | 61.1764222575 | 3.3672504566  |
| C | 94.5996723090  | 62.1934396867 | 3.9121059924  |
| C | 94.4034436810  | 62.5263350286 | 5.3832327315  |
| N | 95.6256249780  | 63.1878079420 | 5.9212792745  |
| C | 93.0790262863  | 59.8959601421 | 1.1410744358  |
| H | 94.8924167049  | 60.8908149446 | 1.6868882662  |
| H | 93.5608082455  | 61.9773673829 | 1.3827665980  |
| H | 93.7328040772  | 60.2125564462 | 3.8787712807  |
| H | 92.5589226072  | 61.4951679206 | 3.5724030160  |
| H | 95.6098313924  | 61.7873115532 | 3.7747025097  |
| H | 94.5585057522  | 63.1180564756 | 3.3215283938  |
| H | 94.2436096117  | 61.6195518774 | 5.9775265823  |
| H | 93.5543683651  | 63.1954551478 | 5.5541882557  |
| H | 95.5459032349  | 63.4014540509 | 6.9235616341  |
| H | 96.4583030790  | 62.5748940979 | 5.7845085962  |
| H | 95.9174493470  | 64.0822642802 | 5.4417678627  |
| H | 91.9891384794  | 59.9623152836 | 1.2453375140  |
| H | 93.4048998648  | 58.9145809186 | 1.4526838852  |
| C | 100.0989992940 | 60.0520006029 | 10.8889972253 |
| C | 99.1796044617  | 61.2758051660 | 10.6859260422 |
| C | 97.9854425827  | 61.0025626495 | 9.8325389076  |
| N | 97.9672160977  | 61.1902420432 | 8.4592106713  |
| C | 96.7868028217  | 60.4549947360 | 10.2204951707 |
| C | 96.8019465293  | 60.7360864695 | 8.0300218711  |
| N | 96.0458271377  | 60.2953806588 | 9.0648570949  |
| H | 100.7720111947 | 59.8784111352 | 10.1700238744 |
| H | 99.4901629529  | 59.1461554626 | 11.0201940503 |

|   |                |               |               |
|---|----------------|---------------|---------------|
| H | 100.5712427323 | 60.2159537800 | 11.7550861881 |
| H | 98.8180424268  | 61.5858196287 | 11.6757161905 |
| H | 99.7435633250  | 62.1139487826 | 10.2741653062 |
| H | 96.4113914181  | 60.1662571892 | 11.1900057148 |
| H | 95.1474031694  | 59.8420685886 | 8.9860741863  |
| H | 96.5119194661  | 60.6597632737 | 6.9942354294  |
| C | 101.6500025842 | 56.1420052209 | 7.7050017582  |
| N | 102.8237805470 | 56.9751886229 | 7.4259915730  |
| C | 103.3533571696 | 57.8788415309 | 8.2553183812  |
| N | 102.7493755458 | 58.1114770938 | 9.4550495940  |
| N | 104.5120748676 | 58.4787086827 | 7.9699194495  |
| H | 101.7302163629 | 55.2565067878 | 7.0665688665  |
| H | 100.7886343771 | 56.5995588297 | 7.4843450065  |
| H | 101.6262276944 | 55.8261440559 | 8.6535096783  |
| H | 103.1290826167 | 57.0368486030 | 6.4565459532  |
| H | 103.1839692841 | 58.8550931550 | 9.9898891760  |
| H | 101.7434678826 | 58.2348063431 | 9.3905551199  |
| H | 104.8976121382 | 58.2871001421 | 7.0382536599  |
| H | 104.5815493832 | 59.4946393778 | 8.1644690177  |
| C | 104.8710010927 | 65.5940002891 | -4.0429953461 |
| C | 104.5777251973 | 64.0952722891 | -3.8272608841 |
| C | 104.0256757391 | 63.7005941467 | -2.4918182311 |
| N | 103.1514063623 | 62.6350399315 | -2.3909302644 |
| C | 104.3167722653 | 64.1907886552 | -1.2383673182 |
| C | 102.9216017223 | 62.4860675655 | -1.1021050690 |
| N | 103.6043855164 | 63.4005306377 | -0.3606724108 |
| H | 105.4142233245 | 65.9758307739 | -3.2952586306 |
| H | 103.9447048749 | 66.1732701442 | -4.1331363813 |
| H | 105.3923871639 | 65.6470938498 | -4.8946699709 |
| H | 105.5119460763 | 63.5388657310 | -4.0060314564 |
| H | 103.8783966478 | 63.7402153565 | -4.5932688562 |
| H | 104.9540745914 | 64.9907418475 | -0.8927862574 |
| H | 103.5687841073 | 63.4756417136 | 0.6473948945  |
| H | 102.2827097892 | 61.7424464636 | -0.6482486849 |
| C | 95.6299757077  | 57.4820326637 | 6.4910615995  |
| C | 97.0376376219  | 57.2386518083 | 7.0509456125  |
| O | 97.7189109732  | 56.2549259262 | 6.2857001861  |
| C | 96.9844420247  | 56.7353459305 | 8.4942213268  |
| H | 95.0957422539  | 58.2416074395 | 7.0824958404  |
| H | 97.9983366582  | 56.6099513605 | 8.8880519613  |
| H | 96.4821519405  | 55.7611099853 | 8.5321173849  |
| H | 96.4455765686  | 57.4307673641 | 9.1485010104  |
| H | 95.0481457353  | 56.5533179205 | 6.5512367913  |
| H | 98.2518831311  | 56.7307380291 | 5.6209383153  |



|   |                |               |               |
|---|----------------|---------------|---------------|
| H | 97.6038659378  | 58.1811199585 | 7.0260085553  |
| C | 98.4859996862  | 66.3580013461 | -1.7130006792 |
| C | 98.8055210169  | 65.6202748092 | -0.3950421598 |
| C | 98.2240416321  | 66.2331884764 | 0.8855321908  |
| C | 96.7355070188  | 65.9729961742 | 1.1221328197  |
| O | 96.0332380410  | 65.2882656282 | 0.3757619128  |
| N | 96.2217820086  | 66.5840561771 | 2.2344106801  |
| H | 98.7144620136  | 67.3289719332 | -1.6420951314 |
| H | 97.4205849745  | 66.2645387196 | -1.9530376265 |
| H | 99.0290070990  | 65.9401255043 | -2.4413702157 |
| H | 98.4734519674  | 64.5795763329 | -0.4682256580 |
| H | 99.8959616363  | 65.5826769402 | -0.2750117008 |
| H | 98.7596276946  | 65.8269586527 | 1.7554945151  |
| H | 98.3939839108  | 67.3191561090 | 0.9161446776  |
| H | 96.8043518009  | 66.8777153152 | 3.0226654056  |
| H | 95.2826033848  | 66.2958387204 | 2.4764849699  |
| C | 103.6859927444 | 68.3259922934 | 12.1929977105 |
| C | 104.4164999626 | 68.6023460289 | 10.8568539389 |
| C | 103.8343994883 | 67.8842591794 | 9.6275984139  |
| C | 103.7562466552 | 66.3491657762 | 9.7061913742  |
| C | 103.2738336511 | 65.7936543412 | 8.3660566895  |
| N | 102.8929359019 | 64.3491514215 | 8.4082328213  |
| H | 104.1085750625 | 67.5601823537 | 12.6777192128 |
| H | 102.6323744217 | 68.0756750836 | 12.0088043237 |
| H | 103.6948493967 | 69.1366815015 | 12.7784182689 |
| H | 104.3918711941 | 69.6788929163 | 10.6436148819 |
| H | 105.4797684265 | 68.3444713060 | 10.9625164459 |
| H | 102.8193401834 | 68.2646174316 | 9.4456176700  |
| H | 104.4295026750 | 68.1657521457 | 8.7468944765  |
| H | 104.7346359705 | 65.9217774059 | 9.9667753796  |
| H | 103.0465758135 | 66.0554242019 | 10.4900798332 |
| H | 102.3728194187 | 66.3201945567 | 8.0452269659  |
| H | 104.0346955597 | 65.8934984525 | 7.5869061193  |
| H | 103.6837270918 | 63.6795745801 | 8.4844735341  |
| H | 102.1712900758 | 64.1681791436 | 9.1193517351  |
| H | 102.4289996654 | 64.0803715291 | 7.5005332466  |
| H | 93.6819221321  | 64.0383974593 | 8.8933376625  |
| H | 95.6198511489  | 57.7972834644 | 5.4686067860  |
| H | 93.3471300446  | 60.0483401280 | 0.1060380297  |
| H | 107.5224146396 | 56.5249257073 | 1.0242611686  |
| H | 100.6720770963 | 55.5613337022 | 3.4047519358  |
| S | 101.2210106011 | 63.5662824751 | 5.8697020550  |
| H | 101.8653282313 | 64.1574349898 | 2.8329616920  |
| H | 94.8291929628  | 59.8672868416 | -1.0815080649 |

|   |               |               |               |
|---|---------------|---------------|---------------|
| C | 95.2420430633 | 60.2379261298 | -2.0081038609 |
| H | 95.8060990000 | 59.4731290000 | -2.5212650000 |
| C | 96.1730411727 | 61.4382713963 | -1.7484193640 |
| C | 97.2059388904 | 61.1052145143 | -0.6935636370 |
| C | 98.1112711627 | 60.0462615734 | -0.8689214660 |
| C | 97.2287056535 | 61.8128537435 | 0.5143708877  |
| C | 98.9991879624 | 59.6861570980 | 0.1456942722  |
| C | 98.1041958231 | 61.4442498719 | 1.5373497380  |
| C | 98.9854674738 | 60.3745648974 | 1.3621474071  |
| H | 94.4085578260 | 60.5231854104 | -2.6642453316 |
| H | 96.6598436689 | 61.7233711437 | -2.6915456041 |
| H | 95.5963726346 | 62.3116871508 | -1.4234819538 |
| H | 96.5741771761 | 62.6722126666 | 0.6415410228  |
| H | 98.1270528818 | 59.5002463542 | -1.8100909072 |
| H | 98.1068611714 | 62.0026207120 | 2.4668794889  |
| H | 99.6786640096 | 60.0982389444 | 2.1511280082  |
| H | 99.7092661283 | 58.8786253276 | -0.0106937503 |

**A<sub>3</sub>:**

E=-7815.850504 solv=-0.124448 disp=-228.42 Z0=902.84

|    |                |               |              |
|----|----------------|---------------|--------------|
| V  | 99.5871994110  | 62.4274713609 | 7.2145502708 |
| Fe | 105.2249159498 | 59.8724917830 | 2.2765430975 |
| Fe | 102.8752641975 | 61.7194867232 | 2.7567935607 |
| Fe | 104.3995833873 | 60.8190530071 | 4.9544527989 |
| Fe | 102.4812795881 | 59.1791544481 | 3.6088010510 |
| Fe | 100.6108759330 | 60.0951676241 | 5.5337021856 |
| Fe | 100.6123949293 | 62.5251278187 | 4.2058623182 |
| Fe | 102.5095204564 | 62.0558191904 | 6.0962464004 |
| C  | 102.0441453060 | 61.0135941443 | 4.4285565953 |
| S  | 104.6405712899 | 58.5823439718 | 4.5005438484 |
| S  | 104.6841901952 | 61.8264500582 | 7.2739922180 |
| S  | 105.1688522181 | 62.1463250848 | 3.1611116081 |
| S  | 102.9048219561 | 59.9179940459 | 1.3668329917 |
| S  | 101.3738804907 | 63.5996282346 | 2.2083212827 |
| S  | 98.6043203299  | 61.5584070120 | 5.1693786041 |
| S  | 101.2434950144 | 60.7728191457 | 7.7505983294 |
| C  | 100.2463929773 | 57.4300997232 | 4.2455905363 |
| O  | 101.2860471017 | 57.5504699233 | 3.5438001656 |
| O  | 99.8739113947  | 58.1416825349 | 5.2267066910 |
| O  | 99.4252860257  | 56.3968477900 | 3.9440127847 |
| C  | 97.7648719369  | 66.4195620810 | 5.5330393451 |
| C  | 98.7014325414  | 66.3802929855 | 6.7728437356 |
| C  | 98.3897035960  | 65.2593404031 | 7.8066048107 |

|   |                |               |               |
|---|----------------|---------------|---------------|
| C | 97.1611473781  | 65.6583558331 | 8.6540881768  |
| C | 96.7562594603  | 64.5824611562 | 9.6948786019  |
| C | 95.2679302282  | 64.4454875938 | 9.8432462049  |
| C | 99.5792511489  | 64.9473086248 | 8.7436038081  |
| O | 97.3115031883  | 65.2575030847 | 5.1521067783  |
| O | 97.5579395263  | 67.4871375805 | 4.9523707451  |
| O | 94.6903223319  | 63.9891159398 | 8.6736623707  |
| O | 94.5854951709  | 64.6783505174 | 10.8133430876 |
| O | 99.8972422569  | 63.6911309870 | 8.8163570569  |
| O | 100.1442527875 | 65.8431896712 | 9.3841865598  |
| O | 98.1090124575  | 64.0260561536 | 7.1155613284  |
| H | 97.8733466674  | 64.3633058399 | 6.1559553602  |
| H | 99.7113393805  | 66.2194008982 | 6.3792565167  |
| H | 98.6909028380  | 67.3563395856 | 7.2626512754  |
| H | 97.3789946478  | 66.6015328283 | 9.1641784666  |
| H | 96.3364879882  | 65.8485957975 | 7.9579510216  |
| H | 97.1454707996  | 63.6108491332 | 9.3745030402  |
| H | 97.1718012638  | 64.8078810242 | 10.6788844902 |
| C | 106.6057181193 | 57.0637608296 | 1.2871541046  |
| H | 105.8161193090 | 56.7826269414 | 0.5835737397  |
| H | 106.3031697058 | 56.7752268192 | 2.2978634990  |
| S | 106.9623418543 | 58.8729964280 | 1.1903399247  |
| C | 93.8346914405  | 61.0242647955 | 1.8497480224  |
| C | 93.6723784350  | 61.1727370887 | 3.3612313651  |
| C | 94.6933869269  | 62.2001545969 | 3.8620123727  |
| C | 94.5691954878  | 62.5234934376 | 5.3437087690  |
| N | 95.7958417152  | 63.2207973511 | 5.8186803065  |
| C | 93.0790263164  | 59.8959601376 | 1.1410744381  |
| H | 94.9025455575  | 60.8994756363 | 1.6301837156  |
| H | 93.5546307865  | 61.9785926948 | 1.3815988029  |
| H | 93.8449805538  | 60.2099190474 | 3.8647546084  |
| H | 92.6462794314  | 61.4814790298 | 3.6127645746  |
| H | 95.7006740002  | 61.8086517539 | 3.6706065476  |
| H | 94.6090644867  | 63.1270192747 | 3.2792554783  |
| H | 94.4699845243  | 61.6094457734 | 5.9395889146  |
| H | 93.7086714484  | 63.1631598000 | 5.5638016097  |
| H | 95.7775648076  | 63.4090991630 | 6.8281403827  |
| H | 96.6536117677  | 62.6429270306 | 5.6239865315  |
| H | 96.0165481507  | 64.1392969842 | 5.3552931233  |
| H | 91.9904406274  | 59.9680188352 | 1.2521708337  |
| H | 93.4048998571  | 58.9145809149 | 1.4526838815  |
| C | 100.0989992235 | 60.0520007218 | 10.8889969882 |
| C | 99.2094728579  | 61.2968200295 | 10.6779106132 |
| C | 98.0356868561  | 61.0689008305 | 9.7833882515  |

|   |                |               |               |
|---|----------------|---------------|---------------|
| N | 98.0608594340  | 61.2802646641 | 8.4126639013  |
| C | 96.8113882251  | 60.5516404633 | 10.1312550914 |
| C | 96.8933686953  | 60.8718515777 | 7.9479623924  |
| N | 96.0953916420  | 60.4385833815 | 8.9543656799  |
| H | 100.7720113101 | 59.8784109719 | 10.1700239074 |
| H | 99.4737085929  | 59.1575674802 | 11.0195430268 |
| H | 100.5712426964 | 60.2159537988 | 11.7550862039 |
| H | 98.8251694310  | 61.5978489492 | 11.6622920368 |
| H | 99.8024358725  | 62.1301303782 | 10.2984909648 |
| H | 96.4023061964  | 60.2582999738 | 11.0857600075 |
| H | 95.1896664020  | 60.0077164220 | 8.8431313847  |
| H | 96.6332116890  | 60.8222789164 | 6.9029744022  |
| C | 101.6500025775 | 56.1420055728 | 7.7050019661  |
| N | 102.8278494646 | 56.9528972732 | 7.3855814533  |
| C | 103.3788420043 | 57.8779548763 | 8.1696923774  |
| N | 102.8229884701 | 58.1368075573 | 9.3880522441  |
| N | 104.5296554591 | 58.4603179306 | 7.8115007078  |
| H | 101.7105259011 | 55.2501046304 | 7.0731080727  |
| H | 100.7886343238 | 56.5995586784 | 7.4843448998  |
| H | 101.6262277038 | 55.8261439135 | 8.6535096312  |
| H | 103.1422827181 | 56.9646937428 | 6.4161138751  |
| H | 103.2349536707 | 58.9307869816 | 9.8648855973  |
| H | 101.8110608865 | 58.2249631257 | 9.3665026154  |
| H | 104.8326989929 | 58.3347297392 | 6.8331114660  |
| H | 104.7057590369 | 59.4118174758 | 8.1321248164  |
| C | 104.8710009016 | 65.5940002869 | -4.0429950069 |
| C | 104.5067738519 | 64.1106172789 | -3.8527370690 |
| C | 103.4916606248 | 63.8177702168 | -2.7940537222 |
| N | 102.5565733767 | 62.8160531649 | -2.9758403129 |
| C | 103.3297467714 | 64.3946315461 | -1.5560476945 |
| C | 101.8489192219 | 62.7923683573 | -1.8637508325 |
| N | 102.2664594311 | 63.7358086451 | -0.9781756737 |
| H | 105.4142234772 | 65.9758308453 | -3.2952587779 |
| H | 103.9610251073 | 66.1974518821 | -4.1527215090 |
| H | 105.3923871567 | 65.6470937044 | -4.8946699842 |
| H | 105.4293461262 | 63.5401235902 | -3.6622318803 |
| H | 104.1074985789 | 63.7168812601 | -4.7950166450 |
| H | 103.8547875370 | 65.1869689300 | -1.0436026942 |
| H | 101.9428092170 | 63.8377361781 | -0.0208469639 |
| H | 101.0307166058 | 62.1203632614 | -1.6433844668 |
| C | 95.6299761223  | 57.4820326466 | 6.4910614639  |
| C | 97.0104469471  | 57.4178127681 | 7.1607736055  |
| O | 97.8758994756  | 56.5133802684 | 6.4925126328  |
| C | 96.8880111070  | 56.9270844322 | 8.6054607740  |

|   |                |               |               |
|---|----------------|---------------|---------------|
| H | 94.9646166839  | 58.1603226618 | 7.0490444941  |
| H | 97.8667877137  | 56.9497954765 | 9.0952371495  |
| H | 96.5272209607  | 55.8915272581 | 8.6136228730  |
| H | 96.1940520948  | 57.5391509019 | 9.1931346711  |
| H | 95.1690115824  | 56.4860062589 | 6.5223952305  |
| H | 98.4334233411  | 57.0366973600 | 5.8873516433  |
| H | 97.4630291844  | 58.4178163462 | 7.1584927454  |
| C | 98.4859997156  | 66.3580013293 | -1.7130006554 |
| C | 98.7937548066  | 65.6317534298 | -0.3862667682 |
| C | 98.2323993757  | 66.2788071004 | 0.8883678551  |
| C | 96.7403427612  | 66.0535312964 | 1.1417709627  |
| O | 96.0184538099  | 65.3694802568 | 0.4133900596  |
| N | 96.2461961382  | 66.6931743261 | 2.2463349491  |
| H | 98.7144620015  | 67.3289719358 | -1.6420951275 |
| H | 97.4208414601  | 66.2682237314 | -1.9564962147 |
| H | 99.0290070825  | 65.9401255174 | -2.4413702355 |
| H | 98.4370571789  | 64.5983297381 | -0.4419008791 |
| H | 99.8835713915  | 65.5728793587 | -0.2721322461 |
| H | 98.7665243541  | 65.8789624897 | 1.7622020868  |
| H | 98.4237088704  | 67.3616394439 | 0.8969538425  |
| H | 96.8336769935  | 66.9956092419 | 3.0270528312  |
| H | 95.3007593406  | 66.4338316532 | 2.4960737216  |
| C | 103.6859926779 | 68.3259919759 | 12.1929974984 |
| C | 104.4548202817 | 68.6312339590 | 10.8850909342 |
| C | 103.9071152119 | 67.9112004639 | 9.6456154308  |
| C | 103.7449169402 | 66.3932627390 | 9.8063222372  |
| C | 103.2157357299 | 65.7843116294 | 8.5143543801  |
| N | 102.6584522418 | 64.4137103106 | 8.6976753707  |
| H | 104.1085750470 | 67.5601824590 | 12.6777193926 |
| H | 102.6360056690 | 68.0831569543 | 11.9866316525 |
| H | 103.6948494697 | 69.1366815554 | 12.7784181931 |
| H | 104.4293829022 | 69.7100324630 | 10.6849559712 |
| H | 105.5157596636 | 68.3783066845 | 11.0222672963 |
| H | 102.9205376700 | 68.3287651031 | 9.4006861363  |
| H | 104.5548697293 | 68.1229061241 | 8.7830653762  |
| H | 104.6987751921 | 65.9261882110 | 10.0912277654 |
| H | 103.0273049205 | 66.1897319985 | 10.6105631376 |
| H | 102.3831450750 | 66.3729412201 | 8.1254646052  |
| H | 103.9825622412 | 65.7177938577 | 7.7376134289  |
| H | 103.3586599064 | 63.6983794147 | 8.9249888949  |
| H | 101.8703538629 | 64.4107075628 | 9.3634359800  |
| H | 102.2188649756 | 64.1178167098 | 7.7796479100  |
| H | 93.7313485680  | 63.9704672869 | 8.8531815153  |
| H | 95.6198508939  | 57.7972834946 | 5.4686067978  |

|   |                |               |               |
|---|----------------|---------------|---------------|
| H | 93.3471302019  | 60.0483403923 | 0.1060382020  |
| H | 107.5224144432 | 56.5249259744 | 1.0242612873  |
| H | 99.8137099526  | 55.9576720719 | 3.1672490597  |
| S | 101.2418825902 | 64.0114882288 | 5.9562627335  |
| H | 102.1211772898 | 64.5068801529 | 2.8774895713  |
| H | 105.6401798299 | 62.6047399969 | 6.7122877258  |
| H | 94.8291924239  | 59.8672862288 | -1.0815085455 |
| C | 95.2420434135  | 60.2379264185 | -2.0081034720 |
| H | 95.8060989998  | 59.4731289999 | -2.5212650001 |
| C | 96.1379754736  | 61.4701032305 | -1.7679880033 |
| C | 97.2310778386  | 61.2021427457 | -0.7524164397 |
| C | 98.2138194411  | 60.2251941089 | -0.9829020674 |
| C | 97.2599245976  | 61.9073363084 | 0.4588406234  |
| C | 99.1883814540  | 59.9459636058 | -0.0219921323 |
| C | 98.2217192062  | 61.6159181716 | 1.4307422758  |
| C | 99.1816048253  | 60.6292128389 | 1.1976779327  |
| H | 94.3990242707  | 60.4984924731 | -2.6641076894 |
| H | 96.5764327036  | 61.7775789536 | -2.7278747207 |
| H | 95.5317072496  | 62.3164638976 | -1.4253490415 |
| H | 96.5506029577  | 62.7151337274 | 0.6232026018  |
| H | 98.2248181825  | 59.6846775214 | -1.9275663891 |
| H | 98.2372401214  | 62.1693089799 | 2.3640807201  |
| H | 99.9423039615  | 60.4146448832 | 1.9412171857  |
| H | 99.9631462112  | 59.2104824190 | -0.2211642913 |

**A<sub>4</sub>:**

E=-7816.418461 solv=-0.116113 disp=-231.70 Z0=907.77

|    |                |               |              |
|----|----------------|---------------|--------------|
| V  | 99.0721565291  | 61.7554018368 | 7.1336709863 |
| Fe | 105.0913927587 | 59.6054388731 | 2.4887401059 |
| Fe | 102.7208404129 | 61.1770005733 | 2.7983465834 |
| Fe | 104.3036992429 | 60.8665304935 | 5.0641950088 |
| Fe | 102.6970606576 | 58.7991202820 | 4.0415688330 |
| Fe | 100.1285888855 | 60.0171458001 | 5.0578537803 |
| Fe | 101.4901405376 | 62.6053687169 | 4.7435232689 |
| Fe | 102.2225725757 | 60.8744190082 | 6.6943395629 |
| C  | 102.1534737631 | 60.6511386791 | 4.6656091814 |
| S  | 105.0457051365 | 58.6169794198 | 4.6512096955 |
| S  | 104.2965334099 | 61.5667968345 | 7.3306702044 |
| S  | 104.9732297113 | 61.8761500005 | 2.9689256520 |
| S  | 102.9180761361 | 59.1825069377 | 1.6442245274 |
| S  | 101.1621438114 | 62.9373561828 | 2.2866429420 |
| S  | 97.8633519100  | 60.9175306306 | 5.3350907881 |
| S  | 100.3981422696 | 59.7878481011 | 7.5523922889 |

|   |                |               |               |
|---|----------------|---------------|---------------|
| C | 100.4978304138 | 57.0513045846 | 4.2806172564  |
| O | 101.7712791870 | 57.0432350209 | 4.4084580744  |
| O | 99.7173942529  | 58.0152117839 | 4.4634952213  |
| O | 99.9249489561  | 55.8840224545 | 3.9182868982  |
| C | 97.7018646040  | 65.8853881292 | 5.3751873416  |
| C | 98.7500639024  | 65.7611014840 | 6.5146187660  |
| C | 98.3791296826  | 64.7600933818 | 7.6442380880  |
| C | 97.2710080411  | 65.3578040441 | 8.5381288960  |
| C | 96.7572309665  | 64.3793923579 | 9.6279450025  |
| C | 95.2679299284  | 64.4454875302 | 9.8432463182  |
| C | 99.6414390937  | 64.3718392724 | 8.4422576309  |
| O | 97.0136751262  | 64.8072815078 | 5.1421070051  |
| O | 97.6263345460  | 66.9373304414 | 4.7351588478  |
| O | 94.5692010434  | 63.9750385674 | 8.7497540019  |
| O | 94.6741175704  | 64.8417978735 | 10.8183332178 |
| O | 100.0180352319 | 63.1469586388 | 8.3151412807  |
| O | 100.2498685509 | 65.2274346515 | 9.1117495716  |
| O | 97.8983318603  | 63.5434674367 | 7.0479293180  |
| H | 97.5837866964  | 63.8680891496 | 6.1073309658  |
| H | 99.6790798969  | 65.4201070837 | 6.0434063789  |
| H | 98.9496132590  | 66.7481692202 | 6.9368352263  |
| H | 97.6514528277  | 66.2693810513 | 9.0075391511  |
| H | 96.4505562978  | 65.6504664539 | 7.8730373239  |
| H | 96.9945827850  | 63.3560582158 | 9.3248508133  |
| H | 97.2372731577  | 64.5732854951 | 10.5890471775 |
| C | 106.6036049758 | 57.0125781684 | 1.3713955112  |
| H | 105.7671624465 | 56.6854719831 | 0.7476594874  |
| H | 106.4172505211 | 56.7224150304 | 2.4086377147  |
| S | 106.8272947048 | 58.8402176825 | 1.2398165512  |
| C | 93.7603414231  | 61.0209695372 | 1.9072474399  |
| C | 93.4251862323  | 61.1121274507 | 3.3912047646  |
| C | 94.3376129043  | 62.1512573904 | 4.0334805069  |
| C | 94.1443212054  | 62.3134292375 | 5.5325659933  |
| N | 95.3837159112  | 62.9104034183 | 6.0947658315  |
| C | 93.0790262094  | 59.8959601454 | 1.1410743752  |
| H | 94.8457504429  | 60.9083496894 | 1.7971795849  |
| H | 93.5123433567  | 61.9808088281 | 1.4322480806  |
| H | 93.5869173218  | 60.1376988991 | 3.8754563638  |
| H | 92.3636684498  | 61.3659639054 | 3.5345525142  |
| H | 95.3753397167  | 61.8414451056 | 3.8598074817  |
| H | 94.2176167050  | 63.1250861003 | 3.5405933326  |
| H | 94.0012839023  | 61.3431597925 | 6.0205563317  |
| H | 93.2964906105  | 62.9561231328 | 5.7912450842  |
| H | 95.3177635643  | 63.1232241015 | 7.0965494397  |

|   |                |               |               |
|---|----------------|---------------|---------------|
| H | 96.1882645142  | 62.2456791574 | 5.9297449054  |
| H | 95.6810094431  | 63.7913107227 | 5.6111884279  |
| H | 91.9849087725  | 59.9399796362 | 1.2243938098  |
| H | 93.4048998931  | 58.9145809333 | 1.4526839017  |
| C | 100.0989993328 | 60.0520005804 | 10.8889970500 |
| C | 99.1717333608  | 61.2741150102 | 10.6954234375 |
| C | 97.8636922105  | 60.9521474481 | 10.0498332960 |
| N | 97.6575350160  | 61.0293770475 | 8.6825338479  |
| C | 96.7173817474  | 60.4797569675 | 10.6412810876 |
| C | 96.4314211144  | 60.5934302763 | 8.4523237725  |
| N | 95.8181447517  | 60.2592925089 | 9.6135171612  |
| H | 100.7720113159 | 59.8784110835 | 10.1700240344 |
| H | 99.4997794160  | 59.1404655378 | 11.0133311832 |
| H | 100.5712426559 | 60.2159538359 | 11.7550862190 |
| H | 98.9569346340  | 61.6916411339 | 11.6880197847 |
| H | 99.6853578574  | 62.0494394041 | 10.1252202704 |
| H | 96.4710908036  | 60.2826661970 | 11.6731967642 |
| H | 94.9013531755  | 59.8453499727 | 9.6973154675  |
| H | 96.0052570183  | 60.4543049742 | 7.4710402297  |
| C | 101.6500025479 | 56.1420051637 | 7.7050016781  |
| N | 102.8555814928 | 56.9044609222 | 7.3894677568  |
| C | 103.4090008673 | 57.8318930197 | 8.1681796101  |
| N | 102.7634477097 | 58.2098796541 | 9.3025441831  |
| N | 104.6245703457 | 58.3324775122 | 7.9001958308  |
| H | 101.6938139634 | 55.2423948474 | 7.0809479364  |
| H | 100.7886343723 | 56.5995588361 | 7.4843450378  |
| H | 101.6262277315 | 55.8261440892 | 8.6535096904  |
| H | 103.1611069062 | 56.8821552666 | 6.4203327416  |
| H | 103.2207326679 | 58.9644589760 | 9.8025788934  |
| H | 101.7698397347 | 58.3961995547 | 9.1554530152  |
| H | 105.0389640190 | 58.0614031428 | 7.0054286305  |
| H | 104.7180183469 | 59.3531869577 | 8.0323289094  |
| C | 104.8710010702 | 65.5940003073 | -4.0429953322 |
| C | 104.5576392532 | 64.1020972031 | -3.8292418987 |
| C | 103.8487722185 | 63.7575167060 | -2.5575446417 |
| N | 103.1003266428 | 62.5995508396 | -2.4630847646 |
| C | 103.8490037262 | 64.4196723062 | -1.3519080961 |
| C | 102.6603554949 | 62.5624826532 | -1.2215697018 |
| N | 103.0868173284 | 63.6406503391 | -0.5078410643 |
| H | 105.4142233304 | 65.9758307745 | -3.2952586350 |
| H | 103.9489980498 | 66.1799796083 | -4.1398242890 |
| H | 105.3923871825 | 65.6470938017 | -4.8946699624 |
| H | 105.5030796551 | 63.5388842369 | -3.8813770767 |
| H | 103.9533013272 | 63.7294667125 | -4.6655528524 |



|   |                |               |               |
|---|----------------|---------------|---------------|
| H | 104.3039558422 | 65.3406995155 | -1.0204328874 |
| H | 102.8640769932 | 63.8265471584 | 0.4582383024  |
| H | 102.0397307282 | 61.7940186818 | -0.7825049016 |
| C | 95.6299755850  | 57.4820326882 | 6.4910616420  |
| C | 97.0635507655  | 57.4210950101 | 7.0426395711  |
| O | 97.8776390643  | 56.5711525559 | 6.2368945531  |
| C | 97.1078727212  | 56.8611516186 | 8.4628304122  |
| H | 95.0063805467  | 58.1755318513 | 7.0750193854  |
| H | 98.1307617369  | 56.8984389383 | 8.8508777060  |
| H | 96.7737203928  | 55.8160698604 | 8.4678085487  |
| H | 96.4622126784  | 57.4334412804 | 9.1403840459  |
| H | 95.1646419458  | 56.4890509194 | 6.5412807652  |
| H | 98.2389705857  | 57.1060308988 | 5.5064458900  |
| H | 97.4896480415  | 58.4315629426 | 7.0416692328  |
| C | 98.4859996244  | 66.3580013678 | -1.7130007865 |
| C | 98.8040012852  | 65.6176334773 | -0.3979992340 |
| C | 98.1530251592  | 66.1905838391 | 0.8658347876  |
| C | 96.6677454931  | 65.8610247661 | 1.0297964335  |
| O | 96.0119704823  | 65.2355295129 | 0.1956969804  |
| N | 96.1088110298  | 66.3453698533 | 2.1804150015  |
| H | 98.7144620257  | 67.3289719303 | -1.6420951316 |
| H | 97.4211622292  | 66.2596537423 | -1.9513484113 |
| H | 99.0290071426  | 65.9401254891 | -2.4413701743 |
| H | 98.5166243416  | 64.5652091089 | -0.4942357033 |
| H | 99.8921194243  | 65.6256856161 | -0.2484130843 |
| H | 98.6704998513  | 65.8067733394 | 1.7560043544  |
| H | 98.2692148970  | 67.2835421750 | 0.9076378048  |
| H | 96.6747032912  | 66.5917032900 | 2.9979127543  |
| H | 95.1760475608  | 66.0051749497 | 2.3743396340  |
| C | 103.6859933646 | 68.3259926882 | 12.1929979796 |
| C | 104.4757467474 | 68.6357876787 | 10.8970471878 |
| C | 103.9518595856 | 67.9578196961 | 9.6256441335  |
| C | 103.8015446213 | 66.4280037671 | 9.6831774014  |
| C | 103.4586593125 | 65.9184160842 | 8.2853210381  |
| N | 102.8481959207 | 64.5580727967 | 8.2432700929  |
| H | 104.1085748851 | 67.5601822008 | 12.6777191258 |
| H | 102.6394352926 | 68.0803262370 | 11.9738389865 |
| H | 103.6948490936 | 69.1366814702 | 12.7784183170 |
| H | 104.4702275592 | 69.7185135077 | 10.7157008486 |
| H | 105.5306431804 | 68.3658175856 | 11.0473087821 |
| H | 102.9685883872 | 68.3818238675 | 9.3763070685  |
| H | 104.6157728429 | 68.2203678995 | 8.7894113622  |
| H | 104.7237850417 | 65.9560341129 | 10.0495304295 |
| H | 102.9986793748 | 66.1601627725 | 10.3815629280 |

|   |                |               |               |
|---|----------------|---------------|---------------|
| H | 102.7150003299 | 66.5694539650 | 7.8181856489  |
| H | 104.3312536068 | 65.8995642454 | 7.6278313337  |
| H | 103.4841581658 | 63.7749104939 | 8.4578404888  |
| H | 101.9798446235 | 64.5322940273 | 8.8164553243  |
| H | 102.5561781675 | 64.4068616353 | 7.2403985038  |
| H | 93.6266046450  | 64.0968093032 | 8.9720341798  |
| H | 95.6198511591  | 57.7972834329 | 5.4686067763  |
| H | 93.3471300224  | 60.0483400224 | 0.1060379970  |
| H | 107.5224147210 | 56.5249254841 | 1.0242611460  |
| H | 100.6516217636 | 55.2554052677 | 3.7687503107  |
| H | 100.2594887071 | 62.3313818668 | 5.9265564251  |
| H | 102.1099064341 | 63.8924492432 | 2.4366494760  |
| S | 102.4837411151 | 64.7570938477 | 5.1119916110  |
| H | 101.4147202414 | 65.5298913608 | 4.8151742026  |
| H | 94.8291929707  | 59.8672868658 | -1.0815080623 |
| C | 95.2420430907  | 60.2379261408 | -2.0081037633 |
| H | 95.8060990000  | 59.4731290000 | -2.5212650000 |
| C | 96.1912391661  | 61.4265443444 | -1.7368709489 |
| C | 97.2485913345  | 61.0449306523 | -0.7217056156 |
| C | 98.1791564725  | 60.0303548612 | -0.9974197660 |
| C | 97.2634710888  | 61.6377862192 | 0.5476026809  |
| C | 99.0731780389  | 59.5923005954 | -0.0198489278 |
| C | 98.1449705047  | 61.1929304486 | 1.5363895165  |
| C | 99.0426283772  | 60.1597774621 | 1.2570372684  |
| H | 94.4118219400  | 60.5365239031 | -2.6621755032 |
| H | 96.6583289005  | 61.7309060094 | -2.6835953676 |
| H | 95.6335993397  | 62.2971935369 | -1.3730238236 |
| H | 96.5872117286  | 62.4644790437 | 0.7529995925  |
| H | 98.2022562619  | 59.5754145953 | -1.9860343680 |
| H | 98.1346473539  | 61.6474895701 | 2.5222006393  |
| H | 99.7275125083  | 59.8037365962 | 2.0205828873  |
| H | 99.7935701721  | 58.8113986621 | -0.2482734812 |

**TS<sub>H2S</sub>:**

E=-7816.393158 solv=-0.118668 disp=-225.54 Z0=904.45

|     |                |               |              |
|-----|----------------|---------------|--------------|
| V1  | 99.1266880000  | 62.0063090000 | 7.1300880000 |
| Fe2 | 105.3239560000 | 59.6875560000 | 2.6209070000 |
| Fe3 | 102.8908320000 | 61.3284550000 | 2.8926290000 |
| Fe4 | 104.5528220000 | 61.0625100000 | 5.2839870000 |
| Fe5 | 102.9547520000 | 58.9897820000 | 4.1278410000 |
| Fe6 | 100.0402030000 | 60.0627550000 | 5.0697470000 |
| Fe7 | 101.2764810000 | 62.5185830000 | 4.6579190000 |
| Fe8 | 102.1736010000 | 60.9577860000 | 6.6392570000 |

|     |                |               |               |
|-----|----------------|---------------|---------------|
| C9  | 102.1721500000 | 60.7609830000 | 4.6896820000  |
| S10 | 105.1783070000 | 58.6629280000 | 4.7711480000  |
| S11 | 104.2138510000 | 61.6116660000 | 7.5215780000  |
| S12 | 105.2188320000 | 61.9420820000 | 3.1813150000  |
| S13 | 103.2004180000 | 59.2796750000 | 1.7361540000  |
| S14 | 101.5502080000 | 63.2415120000 | 2.4693240000  |
| S15 | 98.0144650000  | 61.2867460000 | 5.2155740000  |
| S16 | 100.3201100000 | 59.9357550000 | 7.5422830000  |
| C17 | 100.5559800000 | 57.2498080000 | 4.1554680000  |
| O18 | 101.8045840000 | 57.2882640000 | 4.3693790000  |
| O19 | 99.7199200000  | 58.1742030000 | 4.3410040000  |
| O20 | 100.0425750000 | 56.0915800000 | 3.6893540000  |
| C21 | 97.7612590000  | 66.1815340000 | 5.4352590000  |
| C22 | 98.7701680000  | 66.0399340000 | 6.6072750000  |
| C23 | 98.3903900000  | 64.9871660000 | 7.6869920000  |
| C24 | 97.2587140000  | 65.5206510000 | 8.5967750000  |
| C25 | 96.7630280000  | 64.4787020000 | 9.6377070000  |
| C26 | 95.2679300000  | 64.4454880000 | 9.8432460000  |
| C27 | 99.6450580000  | 64.5873790000 | 8.4902320000  |
| O28 | 97.1310510000  | 65.0868120000 | 5.1235450000  |
| O29 | 97.6641950000  | 67.2562350000 | 4.8422570000  |
| O30 | 94.5945480000  | 64.0982650000 | 8.6874360000  |
| O31 | 94.6544010000  | 64.6631100000 | 10.8598190000 |
| O32 | 99.9718930000  | 63.3426380000 | 8.4249320000  |
| O33 | 100.3042800000 | 65.4496350000 | 9.0950410000  |
| O34 | 97.9377410000  | 63.7901080000 | 7.0332060000  |
| H35 | 97.6577910000  | 64.1439110000 | 6.0855220000  |
| H36 | 99.7237120000  | 65.7413630000 | 6.1529820000  |
| H37 | 98.9294870000  | 67.0148360000 | 7.0722210000  |
| H38 | 97.6143220000  | 66.4188080000 | 9.1103620000  |
| H39 | 96.4360100000  | 65.8247140000 | 7.9397300000  |
| H40 | 97.0535920000  | 63.4801460000 | 9.2967120000  |
| H41 | 97.2176890000  | 64.6499150000 | 10.6154910000 |
| C42 | 106.6262690000 | 57.0987870000 | 1.2951770000  |
| H43 | 105.8610350000 | 56.9559520000 | 0.5272980000  |
| H44 | 106.2484580000 | 56.7316900000 | 2.2533350000  |
| S45 | 107.0780060000 | 58.8872340000 | 1.4169830000  |
| C46 | 93.7940120000  | 61.0324700000 | 1.8687710000  |
| C47 | 93.4715990000  | 61.2256900000 | 3.3469650000  |
| C48 | 94.4010740000  | 62.3016220000 | 3.9080750000  |
| C49 | 94.1779680000  | 62.6108750000 | 5.3810130000  |
| N50 | 95.4132820000  | 63.2288430000 | 5.9378180000  |
| C51 | 93.0790260000  | 59.8959600000 | 1.1410740000  |
| H52 | 94.8764970000  | 60.8853630000 | 1.7604550000  |

|     |                |               |               |
|-----|----------------|---------------|---------------|
| H53 | 93.5731190000  | 61.9739310000 | 1.3463030000  |
| H54 | 93.6234950000  | 60.2862650000 | 3.8988180000  |
| H55 | 92.4148110000  | 61.5045770000 | 3.4769350000  |
| H56 | 95.4347920000  | 61.9558140000 | 3.7821810000  |
| H57 | 94.3109410000  | 63.2251080000 | 3.3213210000  |
| H58 | 93.9935720000  | 61.6955430000 | 5.9543370000  |
| H59 | 93.3411380000  | 63.2951250000 | 5.5530700000  |
| H60 | 95.3303810000  | 63.4602730000 | 6.9358710000  |
| H61 | 96.2179570000  | 62.5685350000 | 5.8108000000  |
| H62 | 95.7348620000  | 64.0983870000 | 5.4462500000  |
| H63 | 91.9873480000  | 59.9556520000 | 1.2361420000  |
| H64 | 93.4049000000  | 58.9145810000 | 1.4526840000  |
| C65 | 100.0989990000 | 60.0520010000 | 10.8889970000 |
| C66 | 99.1630960000  | 61.2648440000 | 10.6683840000 |
| C67 | 97.8816520000  | 60.9542800000 | 9.9565480000  |
| N68 | 97.6763660000  | 61.2015330000 | 8.6061870000  |
| C69 | 96.7511430000  | 60.3626380000 | 10.4665310000 |
| C70 | 96.4711920000  | 60.7479340000 | 8.3084590000  |
| N71 | 95.8672720000  | 60.2409090000 | 9.4104450000  |
| H72 | 100.7720110000 | 59.8784110000 | 10.1700240000 |
| H73 | 99.5054420000  | 59.1366280000 | 11.0146540000 |
| H74 | 100.5712430000 | 60.2159540000 | 11.7550860000 |
| H75 | 98.9023220000  | 61.6654890000 | 11.6574390000 |
| H76 | 99.6910510000  | 62.0570410000 | 10.1356030000 |
| H77 | 96.5062990000  | 60.0234100000 | 11.4614100000 |
| H78 | 94.9702230000  | 59.7788700000 | 9.4309630000  |
| H79 | 96.0535280000  | 60.7132750000 | 7.3141770000  |
| C80 | 101.6500030000 | 56.1420050000 | 7.7050020000  |
| N81 | 102.8567420000 | 56.9180390000 | 7.4164410000  |
| C82 | 103.3688520000 | 57.8634230000 | 8.2061540000  |
| N83 | 102.6561960000 | 58.2662080000 | 9.2890780000  |
| N84 | 104.5971570000 | 58.3593350000 | 7.9991810000  |
| H85 | 101.7049010000 | 55.2485170000 | 7.0741240000  |
| H86 | 100.7886340000 | 56.5995590000 | 7.4843450000  |
| H87 | 101.6262280000 | 55.8261440000 | 8.6535100000  |
| H88 | 103.2134780000 | 56.8773060000 | 6.4662260000  |
| H89 | 103.0836530000 | 59.0320280000 | 9.7987870000  |
| H90 | 101.6757360000 | 58.4574920000 | 9.0717520000  |
| H91 | 105.0644580000 | 58.0721030000 | 7.1378360000  |
| H92 | 104.6824180000 | 59.3811070000 | 8.1311840000  |
| C93 | 104.8710010000 | 65.5940000000 | -4.0429950000 |
| C94 | 104.5166960000 | 64.1044870000 | -3.8462440000 |
| C95 | 103.6387600000 | 63.7538100000 | -2.6804370000 |
| N96 | 102.6857850000 | 62.7594270000 | -2.8101460000 |

|      |                |               |               |
|------|----------------|---------------|---------------|
| C97  | 103.631360000  | 64.2426950000 | -1.3925210000 |
| C98  | 102.121840000  | 62.6519340000 | -1.6214680000 |
| N99  | 102.6541220000 | 63.5299370000 | -0.7289730000 |
| H100 | 105.4142230000 | 65.9758310000 | -3.2952590000 |
| H101 | 103.9587720000 | 66.1944240000 | -4.1488210000 |
| H102 | 105.3923870000 | 65.6470940000 | -4.8946700000 |
| H103 | 105.4552720000 | 63.5296360000 | -3.7935370000 |
| H104 | 104.0033680000 | 63.7421270000 | -4.7449960000 |
| H105 | 104.2137520000 | 65.0034310000 | -0.8943080000 |
| H106 | 102.4027600000 | 63.6019960000 | 0.2549290000  |
| H107 | 101.3250690000 | 61.9713640000 | -1.3525480000 |
| C108 | 95.6299760000  | 57.4820330000 | 6.4910620000  |
| C109 | 97.0669810000  | 57.4538610000 | 7.0422130000  |
| O110 | 97.9212350000  | 56.6777340000 | 6.2049630000  |
| C111 | 97.1246520000  | 56.8253290000 | 8.4337450000  |
| H112 | 94.9900490000  | 58.1597820000 | 7.0750530000  |
| H113 | 98.1422540000  | 56.8804070000 | 8.8331420000  |
| H114 | 96.8296380000  | 55.7701110000 | 8.3814120000  |
| H115 | 96.4521880000  | 57.3375060000 | 9.1326110000  |
| H116 | 95.1871620000  | 56.4789830000 | 6.5358360000  |
| H117 | 98.2540110000  | 57.2441840000 | 5.4837360000  |
| H118 | 97.4533380000  | 58.4802750000 | 7.0983920000  |
| C119 | 98.4860000000  | 66.3580010000 | -1.7130010000 |
| C120 | 98.8066060000  | 65.6178820000 | -0.3974720000 |
| C121 | 98.2337630000  | 66.2355930000 | 0.8837360000  |
| C122 | 96.7336370000  | 66.0254420000 | 1.0920920000  |
| O123 | 96.0261690000  | 65.3670020000 | 0.3299320000  |
| N124 | 96.2183410000  | 66.6515260000 | 2.1967560000  |
| H125 | 98.7144620000  | 67.3289720000 | -1.6420950000 |
| H126 | 97.4204500000  | 66.2646420000 | -1.9518310000 |
| H127 | 99.0290070000  | 65.9401250000 | -2.4413700000 |
| H128 | 98.4638460000  | 64.5806120000 | -0.4717360000 |
| H129 | 99.8972100000  | 65.5721160000 | -0.2814650000 |
| H130 | 98.7428360000  | 65.7991440000 | 1.7553100000  |
| H131 | 98.4426370000  | 67.3142350000 | 0.9291320000  |
| H132 | 96.8018610000  | 66.9118280000 | 2.9951260000  |
| H133 | 95.2705940000  | 66.3812580000 | 2.4255040000  |
| C134 | 103.6859930000 | 68.3259930000 | 12.1929980000 |
| C135 | 104.4790890000 | 68.6292310000 | 10.8951270000 |
| C136 | 103.9462240000 | 67.9937880000 | 9.6025850000  |
| C137 | 103.7835810000 | 66.4619960000 | 9.5874820000  |
| C138 | 103.4941640000 | 66.0223360000 | 8.1502320000  |
| N139 | 102.8521630000 | 64.6762430000 | 8.0222700000  |
| H140 | 104.1085750000 | 67.5601820000 | 12.6777190000 |

|      |                |               |               |
|------|----------------|---------------|---------------|
| H141 | 102.6397070000 | 68.0785540000 | 11.9740900000 |
| H142 | 103.6948490000 | 69.1366810000 | 12.7784180000 |
| H143 | 104.5017950000 | 69.7142820000 | 10.7293020000 |
| H144 | 105.5271040000 | 68.3307400000 | 11.0391900000 |
| H145 | 102.9676670000 | 68.4354870000 | 9.3662630000  |
| H146 | 104.6158880000 | 68.2855660000 | 8.7806080000  |
| H147 | 104.6882760000 | 65.9657780000 | 9.9640650000  |
| H148 | 102.9514020000 | 66.1699170000 | 10.2395630000 |
| H149 | 102.7892100000 | 66.7133230000 | 7.6814710000  |
| H150 | 104.3960080000 | 66.0101590000 | 7.5341380000  |
| H151 | 103.4652260000 | 63.8590940000 | 8.2056990000  |
| H152 | 101.9951910000 | 64.6380160000 | 8.6086300000  |
| H153 | 102.5610380000 | 64.5690220000 | 7.0257460000  |
| H154 | 93.6474240000  | 64.1310060000 | 8.9212680000  |
| H155 | 95.6198510000  | 57.7972830000 | 5.4686070000  |
| H156 | 93.3471300000  | 60.0483400000 | 0.1060380000  |
| H157 | 107.5224150000 | 56.5249250000 | 1.0242610000  |
| H158 | 100.7991130000 | 55.5008430000 | 3.5332510000  |
| H159 | 100.4531470000 | 62.7081860000 | 6.1625420000  |
| H160 | 102.2744860000 | 64.3426570000 | 3.5173450000  |
| S161 | 102.6430710000 | 65.3005000000 | 4.7909570000  |
| H162 | 101.5156690000 | 66.0264620000 | 4.6238440000  |
| H163 | 94.8291930000  | 59.8672870000 | -1.0815080000 |
| C164 | 95.2420430000  | 60.2379260000 | -2.0081040000 |
| H165 | 95.8060990000  | 59.4731290000 | -2.5212650000 |
| C166 | 96.1471680000  | 61.4626620000 | -1.7717010000 |
| C167 | 97.3099210000  | 61.1426660000 | -0.8564590000 |
| C168 | 98.2761630000  | 60.1968600000 | -1.2296790000 |
| C169 | 97.4272280000  | 61.7605420000 | 0.3955600000  |
| C170 | 99.3214000000  | 59.8622280000 | -0.3679070000 |
| C171 | 98.4693640000  | 61.4272360000 | 1.2641980000  |
| C172 | 99.4147960000  | 60.4718050000 | 0.8864930000  |
| H173 | 94.3980900000  | 60.5072310000 | -2.6590340000 |
| H174 | 96.5198730000  | 61.8148840000 | -2.7438810000 |
| H175 | 95.5669520000  | 62.2903560000 | -1.3476330000 |
| H176 | 96.7156770000  | 62.5350620000 | 0.6743300000  |
| H177 | 98.2150600000  | 59.7226970000 | -2.2076740000 |
| H178 | 98.5512100000  | 61.9174690000 | 2.2287200000  |
| H179 | 100.2376740000 | 60.2225700000 | 1.5484370000  |
| H180 | 100.0696900000 | 59.1348950000 | -0.6729360000 |

**A<sub>4</sub>'**:

E=-7417.084609 solv=-0.124097 disp=-220.89 Z0=896.67

|    |                |               |               |
|----|----------------|---------------|---------------|
| V  | 99.5606825865  | 62.0838318900 | 7.2918774629  |
| Fe | 105.2472743824 | 59.7013318345 | 2.6414727615  |
| Fe | 103.0191065916 | 61.5646709938 | 3.1299188102  |
| Fe | 104.6344521150 | 60.8080909792 | 5.2880183830  |
| Fe | 102.8239993131 | 58.9893981267 | 3.9844463606  |
| Fe | 100.5011759426 | 59.8487534948 | 5.3053533458  |
| Fe | 101.0267382312 | 62.4355612286 | 4.6685639207  |
| Fe | 102.4924717655 | 61.0750070779 | 6.7947769338  |
| C  | 102.2952361023 | 60.7538505137 | 4.8233942976  |
| S  | 105.0969726575 | 58.5258546046 | 4.7219941357  |
| S  | 104.5982385383 | 61.6017642864 | 7.5169170289  |
| S  | 105.3884674208 | 61.9221277957 | 3.2866531223  |
| S  | 103.0858418278 | 59.6560228150 | 1.6888736501  |
| S  | 101.8327278614 | 63.4501589092 | 2.8450120701  |
| S  | 98.7481537018  | 61.5665963875 | 5.1465481756  |
| S  | 100.6868968616 | 60.0239382276 | 7.7368659435  |
| C  | 100.5987013371 | 57.1065592434 | 4.3019322692  |
| O  | 101.8592746525 | 57.1808001283 | 4.1894246174  |
| O  | 99.8205576248  | 57.9571228246 | 4.8248144858  |
| O  | 100.0024476260 | 55.9866357733 | 3.8436271960  |
| C  | 97.9616480135  | 66.2044769061 | 5.5982838428  |
| C  | 98.9361460855  | 66.0806893888 | 6.8059732429  |
| C  | 98.5292224018  | 65.0110299777 | 7.8641065405  |
| C  | 97.2967278242  | 65.4969797808 | 8.6648018802  |
| C  | 96.7746693568  | 64.4781329189 | 9.7157305044  |
| C  | 95.2679300213  | 64.4454875340 | 9.8432462286  |
| C  | 99.7288140867  | 64.6926437448 | 8.7816281930  |
| O  | 97.4187547986  | 65.0780546592 | 5.2366829790  |
| O  | 97.8069281177  | 67.2897321969 | 5.0381223625  |
| O  | 94.6870758344  | 63.9856540979 | 8.6783252128  |
| O  | 94.5890615562  | 64.7516301023 | 10.7940878567 |
| O  | 100.1783190602 | 63.4728652013 | 8.6988437678  |
| O  | 100.2314377924 | 65.5768655333 | 9.4826949384  |
| O  | 98.2102327167  | 63.7896501678 | 7.1777203553  |
| H  | 97.9627239365  | 64.1357903094 | 6.2265762451  |
| H  | 99.9080427656  | 65.7958270426 | 6.3795301737  |
| H  | 99.0609682756  | 67.0552035424 | 7.2816068492  |
| H  | 97.5567802025  | 66.4357844421 | 9.1623413321  |
| H  | 96.5113950041  | 65.7226373511 | 7.9347410922  |
| H  | 97.0902291723  | 63.4719732097 | 9.4219301494  |
| H  | 97.1875575906  | 64.6892228975 | 10.7042486044 |
| C  | 106.6276909282 | 57.0481112358 | 1.3876730221  |
| H  | 105.7834352549 | 56.8020963705 | 0.7371767090  |
| H  | 106.4096050208 | 56.7121249436 | 2.4049317566  |

|   |                |               |               |
|---|----------------|---------------|---------------|
| S | 106.9521474526 | 58.8666736247 | 1.3646164735  |
| C | 93.8276362891  | 61.0260765579 | 1.8500003071  |
| C | 93.6849290382  | 61.1386377291 | 3.3647869832  |
| C | 94.7054280912  | 62.1588026521 | 3.8761339782  |
| C | 94.5975811625  | 62.4304193314 | 5.3679382698  |
| N | 95.8421013260  | 63.0859584928 | 5.8544631641  |
| C | 93.0790262245  | 59.8959601620 | 1.1410744081  |
| H | 94.8939134604  | 60.9247209219 | 1.6105326827  |
| H | 93.5215264925  | 61.9828165407 | 1.4037382762  |
| H | 93.8719666208  | 60.1650050097 | 3.8418682700  |
| H | 92.6601910802  | 61.4330576908 | 3.6386349773  |
| H | 95.7125145908  | 61.7828886419 | 3.6538166512  |
| H | 94.6050432417  | 63.1024576738 | 3.3240015579  |
| H | 94.4833801719  | 61.4984768829 | 5.9323652004  |
| H | 93.7537938257  | 63.0806773427 | 5.6188281242  |
| H | 95.8275601898  | 63.2636771925 | 6.8654955276  |
| H | 96.6846336508  | 62.4954316512 | 5.6461158561  |
| H | 96.0819433622  | 64.0035001705 | 5.4008010387  |
| H | 91.9901723846  | 59.9648728150 | 1.2516627203  |
| H | 93.4048998872  | 58.9145809298 | 1.4526838969  |
| C | 100.0989993674 | 60.0520007254 | 10.8889969645 |
| C | 99.1498875528  | 61.2556137914 | 10.7055041287 |
| C | 97.9462476316  | 60.9695827757 | 9.8677083995  |
| N | 97.9191647355  | 61.1782699848 | 8.4991541741  |
| C | 96.7520634132  | 60.4088366566 | 10.2513459120 |
| C | 96.7577544925  | 60.7255621538 | 8.0650160358  |
| N | 96.0077410269  | 60.2627408920 | 9.0956964679  |
| H | 100.7720113283 | 59.8784109931 | 10.1700240420 |
| H | 99.5067948735  | 59.1345854909 | 11.0184647281 |
| H | 100.5712426423 | 60.2159537996 | 11.7550862333 |
| H | 98.7999263398  | 61.5538354787 | 11.7029084664 |
| H | 99.6940666097  | 62.1069378860 | 10.2927123877 |
| H | 96.3794243895  | 60.1048244358 | 11.2172229329 |
| H | 95.1101315132  | 59.8081311315 | 9.0142426425  |
| H | 96.4641253749  | 60.6586993888 | 7.0297857888  |
| C | 101.6500025681 | 56.1420052469 | 7.7050017406  |
| N | 102.8454214072 | 56.9303265284 | 7.4085157872  |
| C | 103.4375815251 | 57.7820537593 | 8.2443828243  |
| N | 102.8358550608 | 58.0678257273 | 9.4317848815  |
| N | 104.6488717964 | 58.2877300558 | 7.9775826241  |
| H | 101.7064749190 | 55.2470483483 | 7.0750225683  |
| H | 100.7886343612 | 56.5995587959 | 7.4843449978  |
| H | 101.6262277141 | 55.8261440640 | 8.6535096816  |
| H | 103.1531888188 | 56.9612833959 | 6.4389539647  |



|   |                |               |               |
|---|----------------|---------------|---------------|
| H | 103.3264412773 | 58.7646370596 | 9.9812282182  |
| H | 101.8460606681 | 58.2888592474 | 9.3355608571  |
| H | 105.0353634880 | 58.0810598734 | 7.0505870206  |
| H | 104.7824500609 | 59.2870702983 | 8.1984357870  |
| C | 104.8710008956 | 65.5940004129 | -4.0429950314 |
| C | 104.5873449119 | 64.1009983931 | -3.7513504312 |
| C | 104.0270665084 | 63.8346605531 | -2.3881674920 |
| N | 102.7131284983 | 64.1249239123 | -2.0706898247 |
| C | 104.6742276612 | 63.3143629204 | -1.2901069570 |
| C | 102.5759174775 | 63.7810499827 | -0.8039448433 |
| N | 103.7345871364 | 63.2926382655 | -0.2827996367 |
| H | 105.4142233796 | 65.9758308916 | -3.2952587306 |
| H | 103.9371905315 | 66.1591932325 | -4.1296920740 |
| H | 105.3923872364 | 65.6470935380 | -4.8946699459 |
| H | 105.5263819124 | 63.5406936631 | -3.8597022794 |
| H | 103.9000931682 | 63.7065004604 | -4.5115611195 |
| H | 105.6825934619 | 62.9596006467 | -1.1367850884 |
| H | 103.8592135365 | 62.9396975783 | 0.6582581770  |
| H | 101.6730974523 | 63.8485625982 | -0.2138887526 |
| C | 95.6299757305  | 57.4820327412 | 6.4910616085  |
| C | 97.0644097387  | 57.3401261871 | 7.0290302580  |
| O | 97.8170388120  | 56.4500297659 | 6.2142575848  |
| C | 97.0824393885  | 56.7812044379 | 8.4522604335  |
| H | 95.0473357598  | 58.2030486707 | 7.0840937530  |
| H | 98.1076061236  | 56.7560636492 | 8.8349999379  |
| H | 96.6894465626  | 55.7572209630 | 8.4556585885  |
| H | 96.4760533593  | 57.3881138414 | 9.1353542760  |
| H | 95.1151199698  | 56.5148022412 | 6.5440320596  |
| H | 98.3310755851  | 56.9800105324 | 5.5754667860  |
| H | 97.5487520033  | 58.3264352890 | 7.0333691754  |
| C | 98.4859996148  | 66.3580013517 | -1.7130007866 |
| C | 98.8421928358  | 65.6382211797 | -0.3936847960 |
| C | 98.3160481228  | 66.2776456517 | 0.8983081251  |
| C | 96.8323303163  | 66.0550679790 | 1.1906065240  |
| O | 96.0755942139  | 65.4172082587 | 0.4560281180  |
| N | 96.3823905828  | 66.6483227332 | 2.3402307934  |
| H | 98.7144620224  | 67.3289719301 | -1.6420951188 |
| H | 97.4178284322  | 66.2568234294 | -1.9345556720 |
| H | 99.0290071473  | 65.9401254950 | -2.4413701743 |
| H | 98.5071449741  | 64.5969426697 | -0.4380595682 |
| H | 99.9360617281  | 65.6041727525 | -0.3148392127 |
| H | 98.8787810400  | 65.8790543680 | 1.7546232044  |
| H | 98.5062209948  | 67.3609445113 | 0.9029486659  |
| H | 97.0009704555  | 66.9090296825 | 3.1104152507  |

|   |                |               |               |
|---|----------------|---------------|---------------|
| H | 95.4418922079  | 66.3907278741 | 2.6093804335  |
| C | 103.6859931304 | 68.3259924761 | 12.1929978666 |
| C | 104.3649228326 | 68.5537093709 | 10.8197513579 |
| C | 103.7093265964 | 67.8527097464 | 9.6085501196  |
| C | 103.6561496399 | 66.3072755355 | 9.6000833345  |
| C | 103.1920723743 | 65.8341971641 | 8.2157562755  |
| N | 102.8717519507 | 64.3656792747 | 8.1275205168  |
| H | 104.1085749227 | 67.5601822624 | 12.6777191902 |
| H | 102.6267142927 | 68.0707386069 | 12.0435995015 |
| H | 103.6948492247 | 69.1366815086 | 12.7784182617 |
| H | 104.3669465955 | 69.6271567175 | 10.5904835378 |
| H | 105.4229974428 | 68.2625144555 | 10.8792124826 |
| H | 102.6802869201 | 68.2241589423 | 9.5041679561  |
| H | 104.2454989005 | 68.1844342456 | 8.7073971769  |
| H | 104.6424135842 | 65.8826025622 | 9.8323804922  |
| H | 102.9466949191 | 65.9507286900 | 10.3561366090 |
| H | 102.2704063270 | 66.3502115369 | 7.9396505108  |
| H | 103.9490022748 | 66.0318665635 | 7.4515679460  |
| H | 103.6803481573 | 63.7108865726 | 8.2208558688  |
| H | 102.1206133557 | 64.0850954918 | 8.7849170293  |
| H | 102.4808189273 | 64.1187606580 | 7.2029775656  |
| H | 93.7244272010  | 64.0292730733 | 8.8333289556  |
| H | 95.6198510793  | 57.7972834192 | 5.4686067728  |
| H | 93.3471300164  | 60.0483400105 | 0.1060379870  |
| H | 107.5224146709 | 56.5249255497 | 1.0242611578  |
| H | 100.7038007146 | 55.4494211951 | 3.4356858936  |
| H | 101.0069218830 | 62.8313903852 | 6.4728399361  |
| H | 94.8291929469  | 59.8672869102 | -1.0815080541 |
| C | 95.2420431227  | 60.2379261136 | -2.0081037557 |
| H | 95.8060990000  | 59.4731290000 | -2.5212650000 |
| C | 96.1576931540  | 61.4362650496 | -1.6966949697 |
| C | 97.1595953282  | 61.1338336163 | -0.5972187232 |
| C | 97.9469235780  | 59.9720064951 | -0.6232700693 |
| C | 97.3186921856  | 62.0245701736 | 0.4750515131  |
| C | 98.8732611495  | 59.7094417849 | 0.3883481507  |
| C | 98.2463861688  | 61.7646518280 | 1.4878830704  |
| C | 99.0259462982  | 60.6063872669 | 1.4478776334  |
| H | 94.4155264063  | 60.5330592643 | -2.6673483918 |
| H | 96.6838120710  | 61.7396943497 | -2.6134519443 |
| H | 95.5558643629  | 62.3018618347 | -1.3958846335 |
| H | 96.7370558775  | 62.9442710775 | 0.4965148175  |
| H | 97.8523722216  | 59.2721918132 | -1.4507358702 |
| H | 98.3869336243  | 62.4731514256 | 2.2976979538  |
| H | 99.7676563352  | 60.4273022154 | 2.2183567046  |

H 99.4947760731 58.8190743687 0.3385776104

**A<sub>5</sub> (E<sub>0</sub>):**

E=-7417.665898 solv=-0.127710 disp=-223.50 Z0=901.48

|    |                |               |               |
|----|----------------|---------------|---------------|
| V  | 99.4601583819  | 62.0649471480 | 7.2956573210  |
| Fe | 105.2672272263 | 59.8573373023 | 2.3982032311  |
| Fe | 102.8538099811 | 61.5679386831 | 3.0504675980  |
| Fe | 104.4709064766 | 60.9074912363 | 5.1530055672  |
| Fe | 102.7146627834 | 58.9879455356 | 3.8797065022  |
| Fe | 100.3974321688 | 59.8082561607 | 5.2744092429  |
| Fe | 100.8083228456 | 62.3664281417 | 4.6782306883  |
| Fe | 102.3598591967 | 61.1621364839 | 6.6966756162  |
| C  | 102.1219335242 | 60.8084306995 | 4.7497674441  |
| S  | 104.9738086314 | 58.6765750873 | 4.6570576625  |
| S  | 104.4540976571 | 61.7092690610 | 7.4200124429  |
| S  | 105.1107206372 | 62.1579536601 | 3.2067336421  |
| S  | 102.8521285012 | 59.7755064087 | 1.6253731370  |
| S  | 101.5010047866 | 63.6241432210 | 2.7681186520  |
| S  | 98.5842437303  | 61.5126233062 | 5.1577007097  |
| S  | 100.6049608432 | 60.0449427765 | 7.7083416464  |
| C  | 100.5155836228 | 57.0804884032 | 4.2327069688  |
| O  | 101.7668957101 | 57.1663858836 | 4.0726006697  |
| O  | 99.7466613020  | 57.9196056602 | 4.7922672567  |
| O  | 99.9076697859  | 55.9595004556 | 3.7897592935  |
| C  | 97.8817744791  | 66.1840185554 | 5.5435198162  |
| C  | 98.8732449621  | 66.0677512074 | 6.7374358410  |
| C  | 98.4739282682  | 65.0169645037 | 7.8150386178  |
| C  | 97.2636212026  | 65.5184416676 | 8.6362716353  |
| C  | 96.7689139862  | 64.4986283589 | 9.6986108010  |
| C  | 95.2679300417  | 64.4454875339 | 9.8432462158  |
| C  | 99.6797960525  | 64.6972763957 | 8.7224162967  |
| O  | 97.3207784724  | 65.0593285312 | 5.2045039553  |
| O  | 97.7307228112  | 67.2642013290 | 4.9715521889  |
| O  | 94.6717616211  | 63.9877356921 | 8.6831233821  |
| O  | 94.5971794616  | 64.7355102052 | 10.8045297483 |
| O  | 100.1061909750 | 63.4691311035 | 8.6635771942  |
| O  | 100.2050226497 | 65.5875708007 | 9.3994935243  |
| O  | 98.1290344304  | 63.7890946996 | 7.1539984051  |
| H  | 97.8745700536  | 64.1189058168 | 6.2023724673  |
| H  | 99.8363574569  | 65.7694076494 | 6.3006487862  |
| H  | 99.0130987847  | 67.0475709787 | 7.1978291556  |
| H  | 97.5398769057  | 66.4562355091 | 9.1267942360  |
| H  | 96.4625468363  | 65.7463995719 | 7.9243284290  |

|   |                |               |               |
|---|----------------|---------------|---------------|
| H | 97.0951659620  | 63.4955948809 | 9.4060524027  |
| H | 97.1890283261  | 64.7205472287 | 10.6815296791 |
| C | 106.6262984194 | 57.0671669553 | 1.3537471723  |
| H | 105.7732732103 | 56.7215415446 | 0.7615100324  |
| H | 106.4450316337 | 56.8398427572 | 2.4080532633  |
| S | 106.8986033520 | 58.8812507602 | 1.1136223447  |
| C | 93.8169320912  | 61.0231181115 | 1.8632312314  |
| C | 93.6240590310  | 61.1428637908 | 3.3723150601  |
| C | 94.6319689556  | 62.1596579743 | 3.9126757862  |
| C | 94.4787108120  | 62.4474107910 | 5.3975297148  |
| N | 95.7103403047  | 63.1102289837 | 5.9081838457  |
| C | 93.0790262303  | 59.8959601555 | 1.1410744111  |
| H | 94.8890851753  | 60.9103444354 | 1.6585455194  |
| H | 93.5334929065  | 61.9804998808 | 1.4033906168  |
| H | 93.7890209025  | 60.1703969635 | 3.8595078389  |
| H | 92.5922735787  | 61.4443063818 | 3.6090315648  |
| H | 95.6433966052  | 61.7742536512 | 3.7304778894  |
| H | 94.5572230090  | 63.0997227388 | 3.3502003965  |
| H | 94.3497166503  | 61.5221659062 | 5.9699031098  |
| H | 93.6276634465  | 63.1000666061 | 5.6157287165  |
| H | 95.6647629995  | 63.3084565225 | 6.9153883863  |
| H | 96.5526542525  | 62.5126234267 | 5.7304424273  |
| H | 95.9645170643  | 64.0150123331 | 5.4366267943  |
| H | 91.9892366939  | 59.9614311482 | 1.2461822208  |
| H | 93.4048998839  | 58.9145809276 | 1.4526838935  |
| C | 100.0989993663 | 60.0520007337 | 10.8889969649 |
| C | 99.1530274032  | 61.2594259540 | 10.7081878248 |
| C | 97.9261711798  | 60.9724091944 | 9.9039771001  |
| N | 97.8538427405  | 61.1841086588 | 8.5370072646  |
| C | 96.7452668584  | 60.4105100404 | 10.3241495151 |
| C | 96.6779557892  | 60.7332666313 | 8.1398225933  |
| N | 95.9630156343  | 60.2675509670 | 9.1934438645  |
| H | 100.7720113287 | 59.8784109834 | 10.1700240421 |
| H | 99.5056485344  | 59.1356069073 | 11.0179770228 |
| H | 100.5712426407 | 60.2159538000 | 11.7550862341 |
| H | 98.8270153342  | 61.5733620095 | 11.7089302133 |
| H | 99.6929758387  | 62.1022274959 | 10.2734176049 |
| H | 96.4046622238  | 60.1035794698 | 11.3008214622 |
| H | 95.0645975462  | 59.8102477522 | 9.1408082849  |
| H | 96.3493789134  | 60.6681022594 | 7.1150877086  |
| C | 101.6500025686 | 56.1420052573 | 7.7050017475  |
| N | 102.8365658863 | 56.9456271428 | 7.3971195089  |
| C | 103.4128060457 | 57.8412193446 | 8.2016498375  |
| N | 102.8297233733 | 58.1223605660 | 9.4022002100  |

|   |                |               |               |
|---|----------------|---------------|---------------|
| N | 104.5887232153 | 58.3944580957 | 7.8889521515  |
| H | 101.7120385002 | 55.2485078845 | 7.0742797363  |
| H | 100.7886343595 | 56.5995587905 | 7.4843449933  |
| H | 101.6262277138 | 55.8261440599 | 8.6535096802  |
| H | 103.1437375522 | 56.9624442980 | 6.4268947101  |
| H | 103.2985801769 | 58.8618687481 | 9.9139416857  |
| H | 101.8300422102 | 58.2979644778 | 9.3290937926  |
| H | 104.9415583530 | 58.2212199637 | 6.9363523157  |
| H | 104.6966827599 | 59.3945360613 | 8.1187068446  |
| C | 104.8710008866 | 65.5940004222 | -4.0429950422 |
| C | 104.6017562328 | 64.0965855137 | -3.7600710326 |
| C | 104.0856864417 | 63.8187911107 | -2.3836791195 |
| N | 102.8070879594 | 64.1779454947 | -2.0020288898 |
| C | 104.7465627199 | 63.2327159681 | -1.3281967144 |
| C | 102.7055024701 | 63.8109358591 | -0.7398494320 |
| N | 103.8535631553 | 63.2409368562 | -0.2790916436 |
| H | 105.4142233845 | 65.9758308780 | -3.2952587272 |
| H | 103.9337550816 | 66.1532109073 | -4.1268061569 |
| H | 105.3923872414 | 65.6470935418 | -4.8946699426 |
| H | 105.5381786872 | 63.5396277617 | -3.9007558830 |
| H | 103.8949718802 | 63.7077624305 | -4.5055691477 |
| H | 105.7372500138 | 62.8151035980 | -1.2279860274 |
| H | 104.0096823191 | 62.8461441528 | 0.6423873596  |
| H | 101.8264476553 | 63.9202921968 | -0.1221416989 |
| C | 95.6299756945  | 57.4820327454 | 6.4910616201  |
| C | 97.0596669571  | 57.3360357554 | 7.0373296554  |
| O | 97.8074731150  | 56.4283598827 | 6.2394968870  |
| C | 97.0641305633  | 56.7945664261 | 8.4670661785  |
| H | 95.0478131869  | 58.2060635394 | 7.0816212093  |
| H | 98.0871958527  | 56.7622174313 | 8.8547324817  |
| H | 96.6592655781  | 55.7754384087 | 8.4809243891  |
| H | 96.4615796924  | 57.4168354717 | 9.1396140727  |
| H | 95.1119302642  | 56.5164513663 | 6.5447877101  |
| H | 98.3115717699  | 56.9465551066 | 5.5829427244  |
| H | 97.5515530075  | 58.3192131001 | 7.0323779158  |
| C | 98.4859996136  | 66.3580013458 | -1.7130007851 |
| C | 98.8412333657  | 65.6446827024 | -0.3901072650 |
| C | 98.2771891778  | 66.2792442806 | 0.8883108014  |
| C | 96.7934830645  | 66.0195607529 | 1.1542759953  |
| O | 96.0654536931  | 65.3685254218 | 0.4031075593  |
| N | 96.3143614470  | 66.5959744907 | 2.2997242800  |
| H | 98.7144620276  | 67.3289719285 | -1.6420951142 |
| H | 97.4181369246  | 66.2541619494 | -1.9337211321 |
| H | 99.0290071443  | 65.9401254999 | -2.4413701794 |

|   |                |               |               |
|---|----------------|---------------|---------------|
| H | 98.5255976903  | 64.5971198899 | -0.4381284055 |
| H | 99.9359481767  | 65.6383183450 | -0.2970680186 |
| H | 98.8333559149  | 65.9063519199 | 1.7605573092  |
| H | 98.4383513024  | 67.3671274288 | 0.8856224001  |
| H | 96.9203969255  | 66.8679863338 | 3.0763851142  |
| H | 95.3763311607  | 66.3179157301 | 2.5565695217  |
| C | 103.6859930824 | 68.3259924257 | 12.1929978619 |
| C | 104.3704820808 | 68.5598485034 | 10.8232299497 |
| C | 103.7065257859 | 67.8818426482 | 9.6046396627  |
| C | 103.6307985483 | 66.3381915369 | 9.5838135416  |
| C | 103.1493526771 | 65.8841825935 | 8.1999080051  |
| N | 102.8115709104 | 64.4218012204 | 8.1016385111  |
| H | 104.1085749356 | 67.5601822825 | 12.6777192107 |
| H | 102.6272107792 | 68.0709588081 | 12.0404728593 |
| H | 103.6948492565 | 69.1366815226 | 12.7784182419 |
| H | 104.3888076052 | 69.6357323510 | 10.6065861648 |
| H | 105.4239759565 | 68.2524633660 | 10.8807039063 |
| H | 102.6834299253 | 68.2703202205 | 9.5025384666  |
| H | 104.2486847914 | 68.2132474231 | 8.7069394606  |
| H | 104.6122441141 | 65.8972822617 | 9.8052255653  |
| H | 102.9226742610 | 65.9848458320 | 10.3427112440 |
| H | 102.2324170425 | 66.4150799984 | 7.9366128661  |
| H | 103.9043248414 | 66.0785377785 | 7.4327162596  |
| H | 103.6131717386 | 63.7477387541 | 8.1662722653  |
| H | 102.0688789351 | 64.1391481061 | 8.7656980143  |
| H | 102.4081072119 | 64.1913651264 | 7.1803048778  |
| H | 93.7116062819  | 64.0191413544 | 8.8559226660  |
| H | 95.6198511004  | 57.7972834136 | 5.4686067709  |
| H | 93.3471300167  | 60.0483400219 | 0.1060379888  |
| H | 107.5224146717 | 56.5249255736 | 1.0242611641  |
| H | 100.5981221531 | 55.4298874587 | 3.3538284413  |
| H | 100.8842526934 | 62.8568533792 | 6.4229788522  |
| H | 94.8291929448  | 59.8672869004 | -1.0815080576 |
| C | 95.2420431207  | 60.2379261176 | -2.0081037521 |
| H | 95.8060990000  | 59.4731290000 | -2.5212650000 |
| C | 96.1345015823  | 61.4695724940 | -1.7601700455 |
| C | 97.1894322081  | 61.2163329140 | -0.7031618792 |
| C | 98.1409404323  | 60.1942730460 | -0.8527110098 |
| C | 97.2122643672  | 61.9864623774 | 0.4669139719  |
| C | 99.0798270697  | 59.9356133873 | 0.1465641660  |
| C | 98.1394522792  | 61.7180413666 | 1.4784069042  |
| C | 99.0704962453  | 60.6879008210 | 1.3249017860  |
| H | 94.4018061412  | 60.5037358547 | -2.6645313319 |
| H | 96.6063722477  | 61.7621313020 | -2.7087439282 |

|   |                |               |               |
|---|----------------|---------------|---------------|
| H | 95.5199355028  | 62.3229699744 | -1.4511046988 |
| H | 96.5194880734  | 62.8181903146 | 0.5727724011  |
| H | 98.1565301665  | 59.6025317586 | -1.7659279940 |
| H | 98.1348320401  | 62.3088959026 | 2.3895614465  |
| H | 99.7999480112  | 60.4827440802 | 2.1014247628  |
| H | 99.8302570737  | 59.1621041083 | 0.0104722681  |
| H | 100.5345131812 | 63.0689131528 | 1.9973350218  |

**E<sub>1</sub>** :

E=-7418.215644 solv=-0.130608 disp=-224.42 Z0=905.38

|    |                |               |               |
|----|----------------|---------------|---------------|
| V  | 99.5415489814  | 62.2244411672 | 7.3140889480  |
| Fe | 105.4075047597 | 59.9553467946 | 2.6651752838  |
| Fe | 103.0392520288 | 61.9210556631 | 3.3169233837  |
| Fe | 105.0639246151 | 61.0721188850 | 5.4732017047  |
| Fe | 102.6521668067 | 59.2714685607 | 3.7378064246  |
| Fe | 100.2956925657 | 59.7223146602 | 5.2539438361  |
| Fe | 100.5852342822 | 62.5395861892 | 4.5249131142  |
| Fe | 102.3582106827 | 61.2110144227 | 6.2980512317  |
| C  | 101.7611016312 | 60.8981137130 | 4.4556824460  |
| S  | 104.7325872405 | 58.8024242608 | 4.8214573131  |
| S  | 104.3399485585 | 61.7151626908 | 7.5773263583  |
| S  | 105.4710547737 | 62.2266962431 | 3.5177292064  |
| S  | 103.1572983787 | 60.1065085415 | 1.6433440385  |
| S  | 101.7995741970 | 64.1367723388 | 3.2450780253  |
| S  | 98.3399471837  | 61.3594338352 | 4.8857439893  |
| S  | 100.6186803548 | 59.9470625256 | 7.5105717858  |
| C  | 100.4390887581 | 57.2510137829 | 3.7892056309  |
| O  | 101.6715068736 | 57.4574978884 | 3.6126327750  |
| O  | 99.6238663612  | 57.9680776510 | 4.4458384187  |
| O  | 99.9112520724  | 56.1325365594 | 3.2457737394  |
| C  | 97.7760199857  | 66.1789701739 | 5.3776702690  |
| C  | 98.7606042777  | 66.1473948480 | 6.5784292565  |
| C  | 98.4267671766  | 65.1008394961 | 7.6805717018  |
| C  | 97.1753137724  | 65.5354929131 | 8.4862502232  |
| C  | 96.7568557244  | 64.5278518174 | 9.5934988406  |
| C  | 95.2679300929  | 64.4454875999 | 9.8432462412  |
| C  | 99.6465719781  | 64.9053966721 | 8.6173116469  |
| O  | 97.2959965373  | 65.0138766616 | 5.0336029192  |
| O  | 97.5540096273  | 67.2421485055 | 4.7955339975  |
| O  | 94.6003046394  | 63.9953316388 | 8.7165694396  |
| O  | 94.6595038703  | 64.6987617291 | 10.8541240622 |
| O  | 100.1364475054 | 63.7028557286 | 8.6816425030  |
| O  | 100.1050193865 | 65.8879837078 | 9.2112742979  |
| O  | 98.1654105282  | 63.8364415917 | 7.0354996035  |

|   |                |               |               |
|---|----------------|---------------|---------------|
| H | 97.8812086140  | 64.1131732372 | 6.0846082696  |
| H | 99.7438833151  | 65.9019417262 | 6.1529755661  |
| H | 98.8384033075  | 67.1439992299 | 7.0155090507  |
| H | 97.3810063730  | 66.5100643378 | 8.9385033516  |
| H | 96.3565880562  | 65.6786693424 | 7.7717644443  |
| H | 97.0817650790  | 63.5243312483 | 9.2990310088  |
| H | 97.2378399213  | 64.7723310327 | 10.5426576055 |
| C | 106.7052206763 | 57.0876330591 | 1.5018245396  |
| H | 105.7822808905 | 56.8951533522 | 0.9461585365  |
| H | 106.5833079557 | 56.7238884836 | 2.5267907147  |
| S | 107.1106310625 | 58.8947849910 | 1.4900651769  |
| C | 93.8162890405  | 61.0322788827 | 1.8568178347  |
| C | 93.5664336610  | 61.2153034109 | 3.3523725982  |
| C | 94.5387282051  | 62.2708255202 | 3.8886948312  |
| C | 94.3557530292  | 62.5899783570 | 5.3665288409  |
| N | 95.6011218628  | 63.2032888959 | 5.9161254697  |
| C | 93.0790262517  | 59.8959601600 | 1.1410743653  |
| H | 94.8939609472  | 60.8940512501 | 1.6960076522  |
| H | 93.5688806523  | 61.9775778419 | 1.3535356509  |
| H | 93.7245990851  | 60.2677433716 | 3.8882705037  |
| H | 92.5222716822  | 61.5111957346 | 3.5342102899  |
| H | 95.5587222176  | 61.8982119410 | 3.7369580826  |
| H | 94.4597460389  | 63.1942810615 | 3.3009663471  |
| H | 94.1687975798  | 61.6799956783 | 5.9475201764  |
| H | 93.5296148182  | 63.2832420315 | 5.5504779189  |
| H | 95.5134787135  | 63.4208151288 | 6.9179121310  |
| H | 96.4026971856  | 62.5517300741 | 5.7863302707  |
| H | 95.9432176057  | 64.0796429080 | 5.4281092620  |
| H | 91.9894020881  | 59.9636260838 | 1.2452347720  |
| H | 93.4048998923  | 58.9145809349 | 1.4526839078  |
| C | 100.0989993044 | 60.0520009226 | 10.8889967324 |
| C | 99.1866685417  | 61.2862276268 | 10.6915741368 |
| C | 97.9659762930  | 61.0200905015 | 9.8730151993  |
| N | 97.8940786738  | 61.2787396583 | 8.5122816031  |
| C | 96.7944205091  | 60.4255919523 | 10.2743141164 |
| C | 96.7233817842  | 60.8196557283 | 8.1031115303  |
| N | 96.0156677711  | 60.3054619834 | 9.1396452280  |
| H | 100.7720114080 | 59.8784109626 | 10.1700241003 |
| H | 99.4871553764  | 59.1481688847 | 11.0136450731 |
| H | 100.5712426214 | 60.2159537520 | 11.7550862537 |
| H | 98.8563784663  | 61.6110614179 | 11.6875856226 |
| H | 99.7481340686  | 62.1191203212 | 10.2612173685 |
| H | 96.4586086302  | 60.0815584718 | 11.2402120916 |
| H | 95.1286513013  | 59.8289029411 | 9.0694269262  |



|   |                |               |               |
|---|----------------|---------------|---------------|
| H | 96.3913428062  | 60.7768549047 | 7.0776190392  |
| C | 101.6500025475 | 56.1420052657 | 7.7050017933  |
| N | 102.8313290748 | 56.9705785501 | 7.4612601026  |
| C | 103.3280867535 | 57.8457600359 | 8.3333580735  |
| N | 102.6569778331 | 58.0719341254 | 9.4965993414  |
| N | 104.5152294865 | 58.4329718936 | 8.1287768274  |
| H | 101.7378570301 | 55.2603053254 | 7.0612946872  |
| H | 100.7886343767 | 56.5995588136 | 7.4843449733  |
| H | 101.6262277080 | 55.8261440226 | 8.6535096676  |
| H | 103.1810165029 | 57.0544603492 | 6.5074790157  |
| H | 103.0864885952 | 58.7852013841 | 10.0754869476 |
| H | 101.6668797755 | 58.2571123339 | 9.3417151729  |
| H | 104.9244010949 | 58.2689327086 | 7.2031974223  |
| H | 104.5521914868 | 59.4443321296 | 8.3448626026  |
| C | 104.8710007409 | 65.5940002462 | -4.0429946237 |
| C | 104.6158460062 | 64.0850497072 | -3.8290488864 |
| C | 104.0395700287 | 63.6767560251 | -2.5129314320 |
| N | 102.7343066095 | 63.9619198800 | -2.1559592107 |
| C | 104.6440256227 | 62.9229500981 | -1.5345057683 |
| C | 102.5638626519 | 63.3812272190 | -0.9842904696 |
| N | 103.6910580799 | 62.7479284741 | -0.5587447801 |
| H | 105.4142233672 | 65.9758309624 | -3.2952587579 |
| H | 103.9315537767 | 66.1494322669 | -4.1279981476 |
| H | 105.3923872543 | 65.6470935222 | -4.8946699358 |
| H | 105.5703562283 | 63.5562123961 | -3.9582414822 |
| H | 103.9575984273 | 63.7260908778 | -4.6329483203 |
| H | 105.6312158424 | 62.4937463238 | -1.4486297264 |
| H | 103.7781011507 | 62.1537906875 | 0.2584300706  |
| H | 101.6463090872 | 63.3704390834 | -0.4121291668 |
| C | 95.6299757658  | 57.4820326825 | 6.4910615615  |
| C | 97.0815803271  | 57.3753416569 | 6.9937444792  |
| O | 97.8285714766  | 56.4881257639 | 6.1684477560  |
| C | 97.1490459083  | 56.8345831731 | 8.4211433633  |
| H | 95.0456271535  | 58.1976122862 | 7.0884779833  |
| H | 98.1837937466  | 56.8356558358 | 8.7771659772  |
| H | 96.7756601139  | 55.8037033911 | 8.4495274037  |
| H | 96.5486427174  | 57.4405503669 | 9.1106167879  |
| H | 95.1348475540  | 56.5050929519 | 6.5501900902  |
| H | 98.2935669672  | 56.9962285717 | 5.4739731232  |
| H | 97.5442140517  | 58.3721551256 | 6.9748118465  |
| C | 98.4859995852  | 66.3580013603 | -1.7130007713 |
| C | 98.8123943151  | 65.6592368789 | -0.3778999900 |
| C | 98.1969593340  | 66.3035048474 | 0.8731689222  |
| C | 96.6963818940  | 66.0689051651 | 1.0615482311  |

|   |                |               |               |
|---|----------------|---------------|---------------|
| O | 95.9997303950  | 65.4314793018 | 0.2679890965  |
| N | 96.1626853333  | 66.6477694882 | 2.1790349005  |
| H | 98.7144620292  | 67.3289719305 | -1.6420951448 |
| H | 97.4198305380  | 66.2579644969 | -1.9433771633 |
| H | 99.0290071657  | 65.9401255021 | -2.4413701648 |
| H | 98.5095398732  | 64.6092363411 | -0.4289842431 |
| H | 99.9032148671  | 65.6604424606 | -0.2491016847 |
| H | 98.7028464331  | 65.9283930094 | 1.7745469386  |
| H | 98.3738974258  | 67.3888112674 | 0.8762728699  |
| H | 96.7250533960  | 66.9083473208 | 2.9946577676  |
| H | 95.2017433950  | 66.3937531308 | 2.3682386535  |
| C | 103.6859929967 | 68.3259923729 | 12.1929977670 |
| C | 104.3856660821 | 68.5781412465 | 10.8344783301 |
| C | 103.7242395182 | 67.9368278806 | 9.5971652541  |
| C | 103.6289603898 | 66.3967475694 | 9.5453981991  |
| C | 103.1556700636 | 65.9791164214 | 8.1486364263  |
| N | 102.7793173135 | 64.5316249088 | 8.0271563329  |
| H | 104.1085749726 | 67.5601822967 | 12.6777192012 |
| H | 102.6285171308 | 68.0723142501 | 12.0303567657 |
| H | 103.6948492841 | 69.1366815075 | 12.7784182622 |
| H | 104.4203561530 | 69.6582531867 | 10.6416464810 |
| H | 105.4344090440 | 68.2552392714 | 10.8949833869 |
| H | 102.7072011656 | 68.3403431388 | 9.4935724330  |
| H | 104.2790451565 | 68.2791656918 | 8.7113490779  |
| H | 104.6011252791 | 65.9364957726 | 9.7686140761  |
| H | 102.9081520016 | 66.0395760983 | 10.2905521427 |
| H | 102.2569235848 | 66.5395353591 | 7.8828298401  |
| H | 103.9259315909 | 66.1667746019 | 7.3950380072  |
| H | 103.5538247333 | 63.8269545788 | 8.1154186861  |
| H | 102.0003547356 | 64.2650374526 | 8.6615591760  |
| H | 102.4048398391 | 64.3223590746 | 7.0901497614  |
| H | 93.6546171184  | 63.9927497999 | 8.9579531441  |
| H | 95.6198511854  | 57.7972834899 | 5.4686067936  |
| H | 93.3471300271  | 60.0483400537 | 0.1060380186  |
| H | 107.5224147565 | 56.5249253651 | 1.0242612115  |
| H | 100.6363359922 | 55.7027560301 | 2.7590519583  |
| H | 101.0354976198 | 62.8686660655 | 6.2768339300  |
| H | 98.1750115149  | 61.4961121760 | 3.5503298968  |
| H | 94.8291928824  | 59.8672868565 | -1.0815081026 |
| C | 95.2420431499  | 60.2379261097 | -2.0081038374 |
| H | 95.8060990000  | 59.4731290000 | -2.5212650000 |
| C | 96.0946478441  | 61.4937555854 | -1.7569694235 |
| C | 97.2433244767  | 61.3035912223 | -0.7825396959 |
| C | 98.1983603537  | 60.2868401148 | -0.9488751845 |

|   |                |               |               |
|---|----------------|---------------|---------------|
| C | 97.4040845275  | 62.1986757562 | 0.2838158145  |
| C | 99.2936842757  | 60.1803921797 | -0.0897704015 |
| C | 98.5096409176  | 62.1026537465 | 1.1361455568  |
| C | 99.4608220668  | 61.0928440809 | 0.9570488249  |
| H | 94.3972057821  | 60.4907160193 | -2.6626023007 |
| H | 96.4942209755  | 61.8505549502 | -2.7175355394 |
| H | 95.4542019010  | 62.3021999182 | -1.3852964215 |
| H | 96.6905883445  | 63.0089140573 | 0.4137662074  |
| H | 98.1032004175  | 59.5860285962 | -1.7753924792 |
| H | 98.6418095840  | 62.8522555948 | 1.9152247293  |
| H | 100.3342654231 | 61.0219544493 | 1.5992164754  |
| H | 100.0408360614 | 59.4079073482 | -0.2493798967 |
| H | 101.1606182273 | 63.9800457408 | 2.0628536144  |

### E1 TS<sub>C-H</sub>

E=-7418.213186 solv=-0.124185 disp=-228.15 Z0=904.12

|    |            |           |          |
|----|------------|-----------|----------|
| V  | 99.533109  | 62.175424 | 7.269395 |
| Fe | 105.295744 | 59.884531 | 2.589235 |
| Fe | 102.941567 | 61.809346 | 3.132733 |
| Fe | 105.046104 | 61.075948 | 5.379602 |
| Fe | 102.636966 | 59.125038 | 3.904279 |
| Fe | 100.405338 | 59.756986 | 5.241598 |
| Fe | 100.595038 | 62.569078 | 4.604093 |
| Fe | 102.388252 | 61.404461 | 6.402367 |
| C  | 101.902252 | 60.926739 | 4.622377 |
| S  | 104.814868 | 58.791002 | 4.819351 |
| S  | 104.442596 | 61.829618 | 7.486277 |
| S  | 105.315691 | 62.185040 | 3.364341 |
| S  | 102.964378 | 59.920762 | 1.705512 |
| S  | 101.618602 | 63.924803 | 2.904558 |
| S  | 98.577354  | 61.424710 | 5.024210 |
| S  | 100.846579 | 60.032815 | 7.514350 |
| C  | 100.707674 | 56.940265 | 4.518480 |
| O  | 101.905352 | 57.174468 | 4.195848 |
| O  | 99.902473  | 57.716937 | 5.111554 |
| O  | 100.219213 | 55.708769 | 4.239047 |
| C  | 97.982771  | 66.289228 | 5.585401 |
| C  | 98.920449  | 66.174995 | 6.821654 |
| C  | 98.522548  | 65.082677 | 7.858348 |
| C  | 97.270958  | 65.532458 | 8.650823 |
| C  | 96.771613  | 64.486097 | 9.684698 |
| C  | 95.267930  | 64.445488 | 9.843246 |
| C  | 99.716021  | 64.777765 | 8.794238 |

|   |            |           |           |
|---|------------|-----------|-----------|
| O | 97.443999  | 65.166315 | 5.206351  |
| O | 97.855086  | 67.370961 | 5.012220  |
| O | 94.661863  | 64.002297 | 8.685052  |
| O | 94.610947  | 64.733766 | 10.814022 |
| O | 100.171805 | 63.563607 | 8.768638  |
| O | 100.206289 | 65.700637 | 9.458331  |
| O | 98.223380  | 63.871737 | 7.143474  |
| H | 97.960610  | 64.230699 | 6.201484  |
| H | 99.912489  | 65.929583 | 6.417238  |
| H | 99.004902  | 67.147784 | 7.309189  |
| H | 97.500931  | 66.472383 | 9.160998  |
| H | 96.484995  | 65.743414 | 7.916379  |
| H | 97.084611  | 63.489309 | 9.357457  |
| H | 97.204586  | 64.674141 | 10.669433 |
| C | 106.673226 | 57.058612 | 1.477058  |
| H | 105.758405 | 56.756620 | 0.957965  |
| H | 106.597511 | 56.767981 | 2.528985  |
| S | 106.943965 | 58.883202 | 1.315513  |
| C | 93.828958  | 61.030208 | 1.846627  |
| C | 93.674583  | 61.170926 | 3.359417  |
| C | 94.678199  | 62.217095 | 3.856716  |
| C | 94.581302  | 62.502862 | 5.348488  |
| N | 95.837228  | 63.151389 | 5.821675  |
| C | 93.079026  | 59.895960 | 1.141074  |
| H | 94.897394  | 60.918252 | 1.619228  |
| H | 93.532181  | 61.981622 | 1.382883  |
| H | 93.872956  | 60.209902 | 3.856432  |
| H | 92.644025  | 61.456792 | 3.618868  |
| H | 95.690389  | 61.855297 | 3.634349  |
| H | 94.555964  | 63.153058 | 3.295722  |
| H | 94.469721  | 61.576298 | 5.921558  |
| H | 93.744025  | 63.160424 | 5.601259  |
| H | 95.837869  | 63.317714 | 6.834467  |
| H | 96.669470  | 62.549261 | 5.595956  |
| H | 96.074693  | 64.068352 | 5.373554  |
| H | 91.990445  | 59.966805 | 1.252018  |
| H | 93.404900  | 58.914581 | 1.452684  |
| C | 100.098999 | 60.052001 | 10.888997 |
| C | 99.150177  | 61.252777 | 10.674865 |
| C | 97.969520  | 60.947159 | 9.809901  |
| N | 97.960959  | 61.169849 | 8.442057  |
| C | 96.784414  | 60.348749 | 10.166529 |
| C | 96.818144  | 60.689065 | 7.983181  |
| N | 96.064770  | 60.195995 | 8.997550  |

|   |            |           |           |
|---|------------|-----------|-----------|
| H | 100.772011 | 59.878411 | 10.170024 |
| H | 99.505714  | 59.135562 | 11.021385 |
| H | 100.571243 | 60.215954 | 11.755086 |
| H | 98.776425  | 61.559040 | 11.661088 |
| H | 99.699994  | 62.101717 | 10.262659 |
| H | 96.404278  | 60.022386 | 11.122469 |
| H | 95.185409  | 59.711477 | 8.894706  |
| H | 96.548553  | 60.622520 | 6.941172  |
| C | 101.650003 | 56.142005 | 7.705002  |
| N | 102.816419 | 56.990813 | 7.451930  |
| C | 103.327906 | 57.858648 | 8.323927  |
| N | 102.738776 | 57.996999 | 9.546543  |
| N | 104.470896 | 58.505694 | 8.065803  |
| H | 101.740121 | 55.262519 | 7.059933  |
| H | 100.788634 | 56.599559 | 7.484345  |
| H | 101.626228 | 55.826144 | 8.653510  |
| H | 103.092130 | 57.123879 | 6.479702  |
| H | 103.173214 | 58.697766 | 10.135525 |
| H | 101.729895 | 58.102587 | 9.506809  |
| H | 104.850442 | 58.377532 | 7.120198  |
| H | 104.509932 | 59.502709 | 8.322014  |
| C | 104.871001 | 65.594000 | -4.042995 |
| C | 104.585588 | 64.083977 | -3.849710 |
| C | 103.933213 | 63.629285 | -2.578499 |
| N | 102.652503 | 64.004797 | -2.214963 |
| C | 104.427651 | 62.712761 | -1.675732 |
| C | 102.387030 | 63.319801 | -1.118975 |
| N | 103.429882 | 62.525609 | -0.745646 |
| H | 105.414223 | 65.975831 | -3.295259 |
| H | 103.938781 | 66.161542 | -4.132112 |
| H | 105.392387 | 65.647094 | -4.894670 |
| H | 105.535709 | 63.540906 | -3.948879 |
| H | 103.964896 | 63.756494 | -4.697105 |
| H | 105.365072 | 62.179111 | -1.617585 |
| H | 103.441802 | 61.850684 | 0.014965  |
| H | 101.461369 | 63.350952 | -0.559452 |
| C | 95.629976  | 57.482033 | 6.491062  |
| C | 97.055622  | 57.248240 | 7.012431  |
| O | 97.717035  | 56.300777 | 6.187476  |
| C | 97.046796  | 56.706781 | 8.445638  |
| H | 95.091287  | 58.229080 | 7.092679  |
| H | 98.072539  | 56.585133 | 8.809299  |
| H | 96.559871  | 55.724248 | 8.468528  |
| H | 96.515972  | 57.374126 | 9.135731  |

|   |            |           |           |
|---|------------|-----------|-----------|
| H | 95.060883  | 56.545237 | 6.549815  |
| H | 98.399440  | 56.777873 | 5.675604  |
| H | 97.607382  | 58.198962 | 6.995136  |
| C | 98.486000  | 66.358001 | -1.713001 |
| C | 98.852434  | 65.660914 | -0.382910 |
| C | 98.345943  | 66.344812 | 0.895152  |
| C | 96.857999  | 66.160049 | 1.194062  |
| O | 96.092180  | 65.527022 | 0.466136  |
| N | 96.421578  | 66.779009 | 2.333965  |
| H | 98.714462  | 67.328972 | -1.642095 |
| H | 97.417318  | 66.253610 | -1.926013 |
| H | 99.029007  | 65.940125 | -2.441370 |
| H | 98.503994  | 64.623157 | -0.398533 |
| H | 99.948466  | 65.622765 | -0.315992 |
| H | 98.900845  | 65.962294 | 1.764033  |
| H | 98.559547  | 67.423222 | 0.868181  |
| H | 97.044025  | 67.029875 | 3.105046  |
| H | 95.473883  | 66.549366 | 2.602925  |
| C | 103.685993 | 68.325992 | 12.192998 |
| C | 104.406911 | 68.593704 | 10.847573 |
| C | 103.764257 | 67.956091 | 9.601429  |
| C | 103.646949 | 66.419325 | 9.585447  |
| C | 103.136045 | 65.969204 | 8.214663  |
| N | 102.796988 | 64.510353 | 8.146548  |
| H | 104.108575 | 67.560182 | 12.677719 |
| H | 102.631143 | 68.072965 | 12.017835 |
| H | 103.694849 | 69.136681 | 12.778418 |
| H | 104.444498 | 69.675450 | 10.664956 |
| H | 105.454218 | 68.268977 | 10.921617 |
| H | 102.756008 | 68.374379 | 9.472170  |
| H | 104.342800 | 68.273493 | 8.721715  |
| H | 104.619537 | 65.954178 | 9.797446  |
| H | 102.937597 | 66.088593 | 10.353326 |
| H | 102.214381 | 66.501145 | 7.970924  |
| H | 103.874832 | 66.157033 | 7.429939  |
| H | 103.604014 | 63.849625 | 8.230881  |
| H | 102.051068 | 64.239549 | 8.815809  |
| H | 102.398225 | 64.255432 | 7.229456  |
| H | 93.703212  | 64.035237 | 8.864971  |
| H | 95.619851  | 57.797283 | 5.468607  |
| H | 93.347130  | 60.048340 | 0.106038  |
| H | 107.522415 | 56.524925 | 1.024261  |
| H | 100.922124 | 55.244733 | 3.751724  |
| H | 101.128762 | 62.937023 | 6.324915  |

|   |            |           |           |
|---|------------|-----------|-----------|
| H | 100.758951 | 59.481288 | 3.669308  |
| H | 94.856552  | 59.832907 | -1.094580 |
| C | 95.234825  | 60.257974 | -2.027867 |
| H | 95.806099  | 59.473129 | -2.521265 |
| C | 96.108281  | 61.490074 | -1.772911 |
| C | 97.240821  | 61.280543 | -0.788494 |
| C | 98.199629  | 60.272688 | -0.971354 |
| C | 97.348111  | 62.110995 | 0.334890  |
| C | 99.233260  | 60.093280 | -0.051250 |
| C | 98.376951  | 61.927283 | 1.262252  |
| C | 99.320485  | 60.915506 | 1.075997  |
| H | 94.381167  | 60.504187 | -2.670958 |
| H | 96.517784  | 61.827955 | -2.736708 |
| H | 95.482451  | 62.316371 | -1.414516 |
| H | 96.641379  | 62.927376 | 0.467511  |
| H | 98.144290  | 59.627452 | -1.846015 |
| H | 98.433272  | 62.567094 | 2.138421  |
| H | 100.119753 | 60.762533 | 1.793284  |
| H | 99.979227  | 59.318574 | -0.207312 |
| H | 100.753838 | 63.497510 | 1.954953  |

### E1 CH product

E=-7418.256586 solv=-0.130979 disp=-224.33 Z0=905.73

|    |                |               |              |
|----|----------------|---------------|--------------|
| V  | 99.6097125199  | 62.2978105616 | 7.2170678766 |
| Fe | 105.7224767352 | 60.0156397393 | 2.5110107668 |
| Fe | 103.2168253437 | 61.7774487349 | 3.1103085775 |
| Fe | 105.3957413257 | 61.1650490258 | 5.2740290225 |
| Fe | 103.1185650189 | 59.1374834107 | 3.8483302553 |
| Fe | 100.3061991844 | 59.8879862570 | 5.4848438371 |
| Fe | 100.8769617156 | 62.6334304194 | 4.5739265171 |
| Fe | 102.7037803942 | 61.2853286343 | 6.0534636599 |
| C  | 101.7909620300 | 60.7495791348 | 4.2691499980 |
| S  | 105.3021229022 | 58.8647747362 | 4.8031464711 |
| S  | 104.5705936796 | 61.8930270640 | 7.3218683881 |
| S  | 105.5466259588 | 62.3613891965 | 3.3131716858 |
| S  | 103.4350491355 | 59.8335884367 | 1.6588834056 |
| S  | 101.8756708177 | 63.9785599521 | 2.8531967520 |
| S  | 98.6448613370  | 61.6659515163 | 5.1155982536 |
| S  | 101.0619695667 | 60.5314995516 | 7.6780525772 |
| C  | 100.7708791521 | 57.1711112936 | 4.6232304629 |
| O  | 102.0090382597 | 57.3822355762 | 4.5820463092 |
| O  | 99.8662747271  | 57.9357800577 | 5.0980165596 |
| O  | 100.3051109055 | 55.9936285899 | 4.1474419283 |

|   |                |               |               |
|---|----------------|---------------|---------------|
| C | 97.8305018805  | 66.3104598150 | 5.5336859028  |
| C | 98.8084524576  | 66.2389771537 | 6.7431796861  |
| C | 98.4559646708  | 65.1592782612 | 7.8101133977  |
| C | 97.2229551505  | 65.5974877427 | 8.6351507456  |
| C | 96.7661536799  | 64.5463831940 | 9.6842699733  |
| C | 95.2679299194  | 64.4454875681 | 9.8432463491  |
| C | 99.6739942294  | 64.8791377827 | 8.7184414906  |
| O | 97.3194087548  | 65.1627976222 | 5.1879127423  |
| O | 97.6458674140  | 67.3782925169 | 4.9494635250  |
| O | 94.6739847913  | 64.0044484362 | 8.6748385556  |
| O | 94.5996696872  | 64.6854493906 | 10.8191076264 |
| O | 100.1367101187 | 63.6622640216 | 8.6557982238  |
| O | 100.1631680121 | 65.7812088744 | 9.4034498778  |
| O | 98.1663378476  | 63.9250315638 | 7.1352409563  |
| H | 97.8902995471  | 64.2535328407 | 6.1866004867  |
| H | 99.7928207961  | 65.9993341009 | 6.3182940920  |
| H | 98.8890230244  | 67.2224706656 | 7.2098866576  |
| H | 97.4579447653  | 66.5403185415 | 9.1376071648  |
| H | 96.4144994497  | 65.8005982207 | 7.9236437821  |
| H | 97.1197091768  | 63.5578410580 | 9.3730331503  |
| H | 97.1889159778  | 64.7634740607 | 10.6669803868 |
| C | 106.7642708487 | 57.2041396359 | 1.4289663810  |
| H | 105.8637712332 | 57.1322097507 | 0.8134192405  |
| H | 106.5248080085 | 56.8911307659 | 2.4487964069  |
| S | 107.4295068828 | 58.9300448805 | 1.4175351090  |
| C | 93.8478217807  | 61.0156473176 | 1.8516900600  |
| C | 93.6659880490  | 61.1656369013 | 3.3605325597  |
| C | 94.6921430873  | 62.1750937430 | 3.8862785750  |
| C | 94.5210561198  | 62.5040917608 | 5.3617715568  |
| N | 95.7371549690  | 63.1925862929 | 5.8786774620  |
| C | 93.0790262292  | 59.8959601458 | 1.1410743610  |
| H | 94.9166897522  | 60.8693723932 | 1.6451007634  |
| H | 93.5897792997  | 61.9738800333 | 1.3792921168  |
| H | 93.8115082079  | 60.1986079250 | 3.8645780097  |
| H | 92.6407292290  | 61.4912167435 | 3.5930399665  |
| H | 95.6987167620  | 61.7654073748 | 3.7305790323  |
| H | 94.6446029999  | 63.1011967324 | 3.2981926468  |
| H | 94.3925211487  | 61.5935219660 | 5.9576790208  |
| H | 93.6604314778  | 63.1535287940 | 5.5499986914  |
| H | 95.6772789107  | 63.3855231786 | 6.8862863739  |
| H | 96.5931102127  | 62.6131636533 | 5.7086476635  |
| H | 95.9850636114  | 64.1036564797 | 5.4136608414  |
| H | 91.9921256725  | 59.9759723688 | 1.2570643763  |
| H | 93.4048998939  | 58.9145809357 | 1.4526839086  |



|   |                |               |               |
|---|----------------|---------------|---------------|
| C | 100.0989993337 | 60.0520006461 | 10.8889970057 |
| C | 99.2029535458  | 61.2909315026 | 10.6642728721 |
| C | 98.0300205236  | 61.0301056762 | 9.7774786027  |
| N | 98.0450223386  | 61.2468579875 | 8.4084147497  |
| C | 96.8274148935  | 60.4626362417 | 10.1229904521 |
| C | 96.8958465218  | 60.7911872492 | 7.9406810177  |
| N | 96.1182299622  | 60.3206498468 | 8.9457450685  |
| H | 100.7720113387 | 59.8784111180 | 10.1700240486 |
| H | 99.4756814771  | 59.1564506762 | 11.0189820371 |
| H | 100.5712426463 | 60.2159538082 | 11.7550862295 |
| H | 98.8221932310  | 61.6124485461 | 11.6429380847 |
| H | 99.7932203260  | 62.1176353788 | 10.2631813523 |
| H | 96.4310346885  | 60.1472923218 | 11.0757173935 |
| H | 95.2290226496  | 59.8562487156 | 8.8337810978  |
| H | 96.6337573765  | 60.7358580029 | 6.8963867539  |
| C | 101.6500025475 | 56.1420051136 | 7.7050016696  |
| N | 102.8157544308 | 56.9876923334 | 7.4239743217  |
| C | 103.3499790245 | 57.8891054448 | 8.2527439264  |
| N | 102.7989778229 | 58.0625923496 | 9.4913610884  |
| N | 104.4674520301 | 58.5413413239 | 7.9281360328  |
| H | 101.7340864803 | 55.2586761980 | 7.0647685155  |
| H | 100.7886343882 | 56.5995588696 | 7.4843450448  |
| H | 101.6262277127 | 55.8261440922 | 8.6535096909  |
| H | 103.0400331178 | 57.1027967254 | 6.4359407313  |
| H | 103.2266832187 | 58.8066207353 | 10.0302362896 |
| H | 101.7866410728 | 58.1281591386 | 9.4956165163  |
| H | 104.8479577724 | 58.4051994845 | 6.9770508383  |
| H | 104.5450208578 | 59.5315389834 | 8.1961065793  |
| C | 104.8710009858 | 65.5940002216 | -4.0429951298 |
| C | 104.5673984408 | 64.1088612663 | -3.7380764715 |
| C | 103.8505021222 | 63.8826935007 | -2.4389351171 |
| N | 102.5479746370 | 63.4249886161 | -2.4241771422 |
| C | 104.2883717783 | 64.0897519272 | -1.1475254036 |
| C | 102.2106545774 | 63.3555196141 | -1.1515794596 |
| N | 103.2289271572 | 63.7472273552 | -0.3371436934 |
| H | 105.4142233594 | 65.9758308144 | -3.2952586767 |
| H | 103.9437515495 | 66.1700531397 | -4.1397599703 |
| H | 105.3923871987 | 65.6470937869 | -4.8946699534 |
| H | 105.5183338974 | 63.5565108087 | -3.7478511894 |
| H | 103.9456173397 | 63.6783227769 | -4.5304709024 |
| H | 105.2327412139 | 64.4118997847 | -0.7354883655 |
| H | 103.1871716428 | 63.7985915411 | 0.6769764795  |
| H | 101.2603651514 | 63.0111372050 | -0.7671430977 |
| C | 95.6299755263  | 57.4820326835 | 6.4910616552  |

|   |                |               |               |
|---|----------------|---------------|---------------|
| C | 97.0597354498  | 57.2939271630 | 7.0227873059  |
| O | 97.7707822881  | 56.3706530170 | 6.2110123269  |
| C | 97.0622345289  | 56.7548695350 | 8.4551262718  |
| H | 95.0707585880  | 58.2184461902 | 7.0879828471  |
| H | 98.0884870896  | 56.6777945493 | 8.8291454509  |
| H | 96.6161509504  | 55.7531845227 | 8.4771051129  |
| H | 96.4965904254  | 57.4020162551 | 9.1363658274  |
| H | 95.0872372457  | 56.5304460366 | 6.5479808486  |
| H | 98.3747685851  | 56.8760384818 | 5.6330951564  |
| H | 97.5753883078  | 58.2650829344 | 7.0112547869  |
| C | 98.4859996122  | 66.3580013639 | -1.7130007970 |
| C | 98.8178697828  | 65.6327758897 | -0.3909473593 |
| C | 98.2484992849  | 66.2685114570 | 0.8849976813  |
| C | 96.7773865126  | 65.9596866986 | 1.1697483953  |
| O | 96.0837977660  | 65.2255796763 | 0.4657797175  |
| N | 96.2698540397  | 66.5886565143 | 2.2762589593  |
| H | 98.7144620317  | 67.3289719296 | -1.6420951404 |
| H | 97.4195947818  | 66.2607588795 | -1.9470367881 |
| H | 99.0290071534  | 65.9401254937 | -2.4413701690 |
| H | 98.4799561650  | 64.5929858202 | -0.4482703768 |
| H | 99.9103855126  | 65.5983877150 | -0.2870123518 |
| H | 98.8215640231  | 65.9228591349 | 1.7575684919  |
| H | 98.3764027385  | 67.3601758972 | 0.8698784172  |
| H | 96.8606910545  | 66.9221909214 | 3.0405398430  |
| H | 95.3480703449  | 66.2766816868 | 2.5519390544  |
| C | 103.6859932711 | 68.3259925467 | 12.1929978970 |
| C | 104.3866962628 | 68.5788110952 | 10.8340752701 |
| C | 103.7348981196 | 67.9222869861 | 9.5993584425  |
| C | 103.6525604645 | 66.3811593319 | 9.5685977311  |
| C | 103.1641275906 | 65.9322912514 | 8.1865267058  |
| N | 102.8226354124 | 64.4723374697 | 8.1001225995  |
| H | 104.1085749052 | 67.5601822397 | 12.6777191698 |
| H | 102.6291577779 | 68.0720425390 | 12.0293297133 |
| H | 103.6948491352 | 69.1366814925 | 12.7784182853 |
| H | 104.4116188171 | 69.6583427600 | 10.6368791316 |
| H | 105.4381666227 | 68.2658793379 | 10.8987824991 |
| H | 102.7148316498 | 68.3166191845 | 9.4892606996  |
| H | 104.2896475908 | 68.2579488834 | 8.7110708456  |
| H | 104.6322730312 | 65.9343113895 | 9.7857734515  |
| H | 102.9447746936 | 66.0284071216 | 10.3286058936 |
| H | 102.2481250216 | 66.4675662829 | 7.9279349182  |
| H | 103.9152077093 | 66.1227370798 | 7.4146008988  |
| H | 103.6349306503 | 63.8070848725 | 8.1241838464  |
| H | 102.1114949782 | 64.1933258911 | 8.7976890068  |

|   |                |               |               |
|---|----------------|---------------|---------------|
| H | 102.3701713426 | 64.2437038905 | 7.1998458161  |
| H | 93.7152519631  | 64.0010221995 | 8.8573383830  |
| H | 95.6198512441  | 57.7972834509 | 5.4686067811  |
| H | 93.3471300418  | 60.0483400679 | 0.1060380265  |
| H | 107.5224148629 | 56.5249253222 | 1.0242611859  |
| H | 101.0717056569 | 55.5325604477 | 3.7640409126  |
| H | 100.9576254122 | 63.2018107463 | 6.2669554373  |
| H | 101.0860036943 | 60.5187854407 | 3.4410285726  |
| H | 94.8291928993  | 59.8672868365 | -1.0815081044 |
| C | 95.2420431294  | 60.2379261443 | -2.0081038253 |
| H | 95.8060990000  | 59.4731290000 | -2.5212650000 |
| C | 96.1160951492  | 61.4926058378 | -1.7922009477 |
| C | 97.3754556379  | 61.2371466326 | -0.9868229273 |
| C | 98.3955954418  | 60.4198740901 | -1.5016453130 |
| C | 97.5623432139  | 61.8204653201 | 0.2744256568  |
| C | 99.5681399162  | 60.1933641607 | -0.7834361962 |
| C | 98.7328755652  | 61.5866088120 | 1.0050519499  |
| C | 99.7413121841  | 60.7731629300 | 0.4778407961  |
| H | 94.3898877250  | 60.4911745939 | -2.6548052832 |
| H | 96.3973388753  | 61.8876808953 | -2.7785791838 |
| H | 95.5284327300  | 62.2808930269 | -1.3067592511 |
| H | 96.8071049736  | 62.4990667252 | 0.6649549203  |
| H | 98.2794073653  | 59.9764436488 | -2.4889752494 |
| H | 98.8521678724  | 62.0379331457 | 1.9869899719  |
| H | 100.6663288926 | 60.5965621030 | 1.0203997652  |
| H | 100.3588590085 | 59.5795413132 | -1.2055497852 |
| H | 100.9135355386 | 63.5938759919 | 1.9784649226  |

**E<sub>2</sub>:**

E=-7418.836556 solv=-0.127745 disp=-225.46 Z0=910.47

|    |                |               |              |
|----|----------------|---------------|--------------|
| V  | 99.5810281623  | 62.6260677801 | 7.3057543174 |
| Fe | 105.8970633958 | 60.0953358989 | 2.7065745305 |
| Fe | 103.4224000963 | 62.0335351218 | 3.5272170203 |
| Fe | 105.5976048547 | 60.9093989407 | 5.5444201237 |
| Fe | 103.2506114401 | 59.3234014101 | 4.1234350504 |
| Fe | 100.3795857526 | 60.2961737034 | 5.7684858001 |
| Fe | 101.0908591160 | 62.9500543762 | 4.8781491313 |
| Fe | 103.0181483046 | 61.4389869216 | 6.1058228425 |
| C  | 101.8758712621 | 60.9604801219 | 4.5108013873 |
| S  | 105.4314925281 | 58.6889034673 | 4.8340359849 |
| S  | 104.8439651344 | 61.5972932227 | 7.6008945082 |
| S  | 105.8663811673 | 62.3057201999 | 3.7495717403 |

|   |                |               |               |
|---|----------------|---------------|---------------|
| S | 103.5226277365 | 60.2367378418 | 1.9672469610  |
| S | 101.9850090882 | 63.9563420678 | 2.8594716450  |
| S | 98.7122990449  | 61.8940330569 | 5.1883321212  |
| S | 101.2805462398 | 60.9583475468 | 7.7885124254  |
| C | 100.7817790688 | 57.5575141971 | 4.7060384619  |
| O | 102.0313859136 | 57.6835316796 | 4.5833071031  |
| O | 99.9689273471  | 58.3283963299 | 5.3022866786  |
| O | 100.2141147061 | 56.4494584126 | 4.1776157780  |
| C | 97.9581546264  | 66.5825003949 | 5.7855614642  |
| C | 98.8708277018  | 66.4810309281 | 7.0424141133  |
| C | 98.4718194625  | 65.3860407196 | 8.0779451192  |
| C | 97.2333560422  | 65.8069737639 | 8.8938641044  |
| C | 96.7531972805  | 64.6916006343 | 9.8641505599  |
| C | 95.2679300971  | 64.4454876509 | 9.8432462679  |
| C | 99.6700767642  | 65.0738750741 | 9.0054131926  |
| O | 97.3787159747  | 65.4626055155 | 5.4528967148  |
| O | 97.8747080426  | 67.6384442946 | 5.1601917700  |
| O | 94.8229741540  | 64.0662166323 | 8.5904863737  |
| O | 94.4873234803  | 64.5304514946 | 10.7621369520 |
| O | 100.1594638409 | 63.8692645148 | 8.8848567939  |
| O | 100.1088223186 | 65.9454469321 | 9.7572386327  |
| O | 98.1477277715  | 64.1737612151 | 7.3719653452  |
| H | 97.8477394134  | 64.5672310443 | 6.4355335535  |
| H | 99.8730730452  | 66.2476203397 | 6.6602229123  |
| H | 98.9317523300  | 67.4557354212 | 7.5311419511  |
| H | 97.4742709345  | 66.7111449840 | 9.4596895221  |
| H | 96.4422008365  | 66.0621497892 | 8.1801766498  |
| H | 97.2288360856  | 63.7469898181 | 9.5794228771  |
| H | 97.0327832962  | 64.9147024931 | 10.8954100317 |
| C | 106.7763044154 | 57.2013712746 | 1.4633240737  |
| H | 105.8377790242 | 57.0870254819 | 0.9119247914  |
| H | 106.6147313372 | 56.9134456723 | 2.5061325235  |
| S | 107.3853983620 | 58.9476475481 | 1.3576852144  |
| C | 93.8671215364  | 61.0261942640 | 1.8233716550  |
| C | 93.7354195442  | 61.2261989274 | 3.3325675231  |
| C | 94.7860132548  | 62.2486609797 | 3.7905688760  |
| C | 94.6464566174  | 62.6406967865 | 5.2550301477  |
| N | 95.8565869291  | 63.3723442401 | 5.7273485261  |
| C | 93.0790261780  | 59.8959601795 | 1.1410742998  |
| H | 94.9294808287  | 60.8722043351 | 1.5913117661  |
| H | 93.6011737621  | 61.9739503351 | 1.3343357720  |
| H | 93.8933328200  | 60.2764839811 | 3.8649398013  |
| H | 92.7203288539  | 61.5662656152 | 3.5884232261  |
| H | 95.7840755559  | 61.8203263248 | 3.6326694612  |

|   |                |               |               |
|---|----------------|---------------|---------------|
| H | 94.7373106965  | 63.1477901779 | 3.1612975165  |
| H | 94.5462194844  | 61.7539589589 | 5.8905815599  |
| H | 93.7767391037  | 63.2811200226 | 5.4333588077  |
| H | 95.8284002545  | 63.5635682183 | 6.7390817394  |
| H | 96.7331074971  | 62.8193661212 | 5.5361661154  |
| H | 96.0471875962  | 64.2949303989 | 5.2754644882  |
| H | 91.9937778567  | 59.9834901896 | 1.2638299228  |
| H | 93.4048999179  | 58.9145809522 | 1.4526839356  |
| C | 100.0989992450 | 60.0520007078 | 10.8889967560 |
| C | 99.2239767218  | 61.3111264868 | 10.6929162053 |
| C | 98.0518798242  | 61.1063221854 | 9.7932518716  |
| N | 98.0781328733  | 61.4024114061 | 8.4422006733  |
| C | 96.8384964344  | 60.5398842659 | 10.1022203082 |
| C | 96.9206390003  | 61.0022696562 | 7.9439890417  |
| N | 96.1299464442  | 60.4857069401 | 8.9161771679  |
| H | 100.7720114131 | 59.8784110368 | 10.1700242001 |
| H | 99.4651562742  | 59.1641487088 | 11.0163444291 |
| H | 100.5712425973 | 60.2159538847 | 11.7550862417 |
| H | 98.8455990951  | 61.6085621794 | 11.6801227057 |
| H | 99.8317805425  | 62.1401847973 | 10.3225651551 |
| H | 96.4324537949  | 60.1766827439 | 11.0336068506 |
| H | 95.2299444990  | 60.0510778321 | 8.7752997466  |
| H | 96.6621095256  | 61.0227899202 | 6.8974678654  |
| C | 101.6500025455 | 56.1420050292 | 7.7050015864  |
| N | 102.8354393865 | 56.9571599596 | 7.4216989549  |
| C | 103.4101233635 | 57.8411100168 | 8.2458718160  |
| N | 102.8123414570 | 58.1252453954 | 9.4382511715  |
| N | 104.5951080641 | 58.3769815327 | 7.9593591451  |
| H | 101.7193673660 | 55.2524286155 | 7.0704981589  |
| H | 100.7886343837 | 56.5995588818 | 7.4843450882  |
| H | 101.6262277353 | 55.8261441325 | 8.6535097049  |
| H | 103.1220868250 | 57.0133581083 | 6.4474540715  |
| H | 103.2711842181 | 58.8634372616 | 9.9609097628  |
| H | 101.8099985189 | 58.2694450483 | 9.3857391918  |
| H | 105.0032664027 | 58.1665799796 | 7.0386333334  |
| H | 104.7392390281 | 59.3774534249 | 8.1874575175  |
| C | 104.8710008554 | 65.5940001583 | -4.0429944264 |
| C | 104.6244562768 | 64.0823573303 | -3.8171442637 |
| C | 103.9750349654 | 63.6864017914 | -2.5284283604 |
| N | 102.6639213870 | 64.0112724888 | -2.2317867401 |
| C | 104.5156732334 | 62.9298017601 | -1.5137793036 |
| C | 102.4263767111 | 63.4567471258 | -1.0598336297 |
| N | 103.5110150425 | 62.7855982524 | -0.5826670986 |
| H | 105.4142233118 | 65.9758310722 | -3.2952587737 |

|   |                |               |               |
|---|----------------|---------------|---------------|
| H | 103.9268678214 | 66.1411249148 | -4.1283642820 |
| H | 105.3923871822 | 65.6470934926 | -4.8946699817 |
| H | 105.5896298938 | 63.5616469843 | -3.8839272630 |
| H | 104.0194782516 | 63.7050536205 | -4.6545846494 |
| H | 105.4894450718 | 62.4839504254 | -1.3739298320 |
| H | 103.5683825960 | 62.2489631676 | 0.2781701577  |
| H | 101.4870794810 | 63.4987476157 | -0.5252123307 |
| C | 95.6299756888  | 57.4820327262 | 6.4910616038  |
| C | 97.0422645431  | 57.4467887638 | 7.0926798352  |
| O | 97.9000677110  | 56.6139016599 | 6.3203127417  |
| C | 97.0273301530  | 56.8973504788 | 8.5208580308  |
| H | 94.9721711643  | 58.1521844017 | 7.0649155555  |
| H | 98.0308331380  | 56.9442857547 | 8.9559489752  |
| H | 96.7083284918  | 55.8481208292 | 8.5126767459  |
| H | 96.3450586164  | 57.4608341364 | 9.1683165346  |
| H | 95.1892838752  | 56.4780496359 | 6.5278193869  |
| H | 98.4573614745  | 57.1912962813 | 5.7664377176  |
| H | 97.4477037711  | 58.4679919904 | 7.1105967374  |
| C | 98.4859995290  | 66.3580013806 | -1.7130008685 |
| C | 98.8537494319  | 65.6385618356 | -0.3935939993 |
| C | 98.3884533251  | 66.3034665301 | 0.9116399559  |
| C | 96.9668148026  | 65.9755250037 | 1.3747186206  |
| O | 96.2339901078  | 65.1490259979 | 0.8277867452  |
| N | 96.5508466406  | 66.6907164109 | 2.4660513189  |
| H | 98.7144620540  | 67.3289719229 | -1.6420951224 |
| H | 97.4168384904  | 66.2589429766 | -1.9355242739 |
| H | 99.0290071961  | 65.9401254891 | -2.4413701345 |
| H | 98.4851204049  | 64.6080341774 | -0.4172278724 |
| H | 99.9484905248  | 65.5755714933 | -0.3506426234 |
| H | 99.0551000001  | 65.9928148749 | 1.7298201131  |
| H | 98.4920121199  | 67.3961019837 | 0.8544906043  |
| H | 97.2040526063  | 67.1100146517 | 3.1282742462  |
| H | 95.6919352470  | 66.3622833185 | 2.8874525493  |
| C | 103.6859932140 | 68.3259924958 | 12.1929978020 |
| C | 104.3554255382 | 68.5446016759 | 10.8166868315 |
| C | 103.6999314064 | 67.8099917724 | 9.6276981247  |
| C | 103.6078067475 | 66.2689706003 | 9.6948532243  |
| C | 103.2200970364 | 65.7325186013 | 8.3124116762  |
| N | 102.8808817099 | 64.2689411531 | 8.2795258515  |
| H | 104.1085749620 | 67.5601822508 | 12.6777191378 |
| H | 102.6258987129 | 68.0707974187 | 12.0482184347 |
| H | 103.6948491526 | 69.1366814739 | 12.7784183111 |
| H | 104.3425827286 | 69.6136327867 | 10.5676013288 |
| H | 105.4171794823 | 68.2665967091 | 10.8755693363 |

|   |                |               |               |
|---|----------------|---------------|---------------|
| H | 102.6807122899 | 68.1976055074 | 9.4928404395  |
| H | 104.2571973098 | 68.0889659026 | 8.7213267230  |
| H | 104.5682653441 | 65.8341761967 | 10.0052486361 |
| H | 102.8455470908 | 65.9713255325 | 10.4242181337 |
| H | 102.3307574524 | 66.2490377365 | 7.9437212169  |
| H | 104.0290312488 | 65.8786109804 | 7.5908665929  |
| H | 103.6535293233 | 63.6406608793 | 8.5619878189  |
| H | 102.0017744959 | 64.0481866659 | 8.8001750281  |
| H | 102.6756214491 | 63.9699355922 | 7.3089399484  |
| H | 93.8567911673  | 63.9670351572 | 8.6888781057  |
| H | 95.6198511104  | 57.7972834376 | 5.4686067782  |
| H | 93.3471300347  | 60.0483399607 | 0.1060380078  |
| H | 107.5224149944 | 56.5249251915 | 1.0242612430  |
| H | 100.9204039442 | 55.9759148702 | 3.7041363669  |
| H | 100.6697761746 | 63.7872871404 | 6.3588001605  |
| H | 101.2246584719 | 63.2883324118 | 1.9610610836  |
| H | 101.2350994871 | 60.7173562097 | 3.6457010035  |
| H | 102.7843654643 | 63.1472460256 | 5.5219872052  |
| H | 94.8291929373  | 59.8672868858 | -1.0815080789 |
| C | 95.2420430888  | 60.2379261311 | -2.0081038582 |
| H | 95.8060990000  | 59.4731290000 | -2.5212650000 |
| C | 96.1556929414  | 61.4474049694 | -1.7282142231 |
| C | 97.3063721106  | 61.1214473089 | -0.7934702606 |
| C | 98.2002203207  | 60.0785972508 | -1.0867422752 |
| C | 97.5095094025  | 61.8650899901 | 0.3783423713  |
| C | 99.2698490259  | 59.7890092457 | -0.2397477107 |
| C | 98.5775808172  | 61.5724083440 | 1.2347656461  |
| C | 99.4611485002  | 60.5340459847 | 0.9273729919  |
| H | 94.4082433972  | 60.5272004053 | -2.6610806087 |
| H | 96.5524964853  | 61.8211947629 | -2.6830500584 |
| H | 95.5696562956  | 62.2696657653 | -1.3011114758 |
| H | 96.8561306169  | 62.7059679758 | 0.6015942064  |
| H | 98.0724707316  | 59.4983499853 | -1.9983449466 |
| H | 98.7192911038  | 62.1524728786 | 2.1426631386  |
| H | 100.3083312385 | 60.3151382676 | 1.5705194894  |
| H | 99.9652675656  | 58.9932655533 | -0.4934324997 |

**E<sub>3</sub>:**

E=-7419.402796 solv=-0.132691 disp=-227.17 Z0=915.07

|    |                |               |              |
|----|----------------|---------------|--------------|
| V  | 99.6549433681  | 62.5969758520 | 7.2910290464 |
| Fe | 105.8671586365 | 60.0652391764 | 2.4935132309 |
| Fe | 103.4328279355 | 61.9652594497 | 3.2662095195 |
| Fe | 105.6654975785 | 60.9984313400 | 5.2659166508 |

|    |                |               |               |
|----|----------------|---------------|---------------|
| Fe | 103.2244906621 | 59.3033461780 | 4.0045629516  |
| Fe | 100.4951428504 | 60.3136802770 | 5.7659659322  |
| Fe | 101.1835366797 | 63.0256146737 | 4.8948009804  |
| Fe | 103.0216761039 | 61.5077060832 | 6.0475464760  |
| C  | 101.9553191453 | 60.9709708389 | 4.4852300240  |
| S  | 105.4576192007 | 58.7886861103 | 4.7856998245  |
| S  | 105.1800778201 | 61.8041707624 | 7.4959882677  |
| S  | 105.8759175699 | 62.3398869486 | 3.4577110002  |
| S  | 103.5176054861 | 60.0595140970 | 1.8024647242  |
| S  | 102.0741581528 | 64.0236869543 | 2.8447766478  |
| S  | 98.8240076151  | 61.8901657956 | 5.1568989542  |
| S  | 101.4197109209 | 60.9687617590 | 7.8141555642  |
| C  | 100.8068798637 | 57.5706797138 | 4.7096939833  |
| O  | 102.0715296623 | 57.6317279130 | 4.6784350085  |
| O  | 100.0103522610 | 58.3284088389 | 5.3409383575  |
| O  | 100.2114939875 | 56.5648918129 | 4.0312270907  |
| C  | 97.9126729582  | 66.5047255245 | 5.6709540790  |
| C  | 98.8241775076  | 66.4466776834 | 6.9295803439  |
| C  | 98.4486671152  | 65.3609258993 | 7.9835759951  |
| C  | 97.1992378604  | 65.7759045041 | 8.7893507256  |
| C  | 96.7531519141  | 64.6935028740 | 9.8120828804  |
| C  | 95.2679300856  | 64.4454876708 | 9.8432463624  |
| C  | 99.6460010298  | 65.1016677880 | 8.9267973438  |
| O  | 97.4190813691  | 65.3539947323 | 5.3141309187  |
| O  | 97.7627757293  | 67.5646962334 | 5.0612059721  |
| O  | 94.7989511601  | 64.0065428494 | 8.6203547421  |
| O  | 94.5107292913  | 64.5736766698 | 10.7770706393 |
| O  | 100.1299387574 | 63.8893660408 | 8.8888728526  |
| O  | 100.0886468599 | 66.0185250007 | 9.6220514486  |
| O  | 98.1622195686  | 64.1237802560 | 7.3026614127  |
| H  | 97.9221248447  | 64.4675229338 | 6.3434131878  |
| H  | 99.8311298338  | 66.2257199250 | 6.5525254527  |
| H  | 98.8622210962  | 67.4299506690 | 7.4023610738  |
| H  | 97.4147671903  | 66.7110287762 | 9.3136873260  |
| H  | 96.3974247753  | 65.9780698073 | 8.0704957710  |
| H  | 97.2244327268  | 63.7401069430 | 9.5489219200  |
| H  | 97.0626984963  | 64.9549971733 | 10.8257057019 |
| C  | 106.7345165673 | 57.2659993341 | 1.2010286303  |
| H  | 106.0219730354 | 57.2268163157 | 0.3718936712  |
| H  | 106.2184724624 | 57.0061760257 | 2.1302635833  |
| S  | 107.4987723947 | 58.9475585692 | 1.3205758660  |
| C  | 93.8714039248  | 61.0188584649 | 1.8286484312  |
| C  | 93.7565360967  | 61.1881196255 | 3.3429433346  |
| C  | 94.8145485447  | 62.1971178139 | 3.8114084740  |



|   |                |               |               |
|---|----------------|---------------|---------------|
| C | 94.6942549847  | 62.5585641855 | 5.2850470238  |
| N | 95.9109592202  | 63.2785438568 | 5.7534942234  |
| C | 93.0790261900  | 59.8959601248 | 1.1410742400  |
| H | 94.9313549339  | 60.8709675555 | 1.5814728362  |
| H | 93.5975906609  | 61.9740601834 | 1.3590217149  |
| H | 93.9165731310  | 60.2265662646 | 3.8530817515  |
| H | 92.7453118835  | 61.5257005882 | 3.6169596071  |
| H | 95.8101334948  | 61.7710065631 | 3.6325077573  |
| H | 94.7597284316  | 63.1097371363 | 3.2026685129  |
| H | 94.5998912513  | 61.6586087326 | 5.9028290873  |
| H | 93.8272303276  | 63.1956012645 | 5.4877233121  |
| H | 95.8936836230  | 63.4629493175 | 6.7653360057  |
| H | 96.7890149985  | 62.7275717052 | 5.5513435683  |
| H | 96.1071637575  | 64.2039711594 | 5.3028679271  |
| H | 91.9943446939  | 59.9843142559 | 1.2672728551  |
| H | 93.4048999104  | 58.9145809491 | 1.4526839338  |
| C | 100.0989992852 | 60.0520005754 | 10.8889968915 |
| C | 99.2162416598  | 61.3033937035 | 10.6853569946 |
| C | 98.0656068442  | 61.0810421304 | 9.7639036591  |
| N | 98.1311162569  | 61.3476292940 | 8.4071470228  |
| C | 96.8479662422  | 60.5126023476 | 10.0508131870 |
| C | 96.9936325954  | 60.9229507305 | 7.8856303118  |
| N | 96.1767156628  | 60.4241134858 | 8.8458862412  |
| H | 100.7720113621 | 59.8784110869 | 10.1700241272 |
| H | 99.4663245228  | 59.1627733661 | 11.0196909281 |
| H | 100.5712426198 | 60.2159538942 | 11.7550862277 |
| H | 98.8185368520  | 61.5920633770 | 11.6676389657 |
| H | 99.8190819333  | 62.1401676857 | 10.3249034355 |
| H | 96.4151050578  | 60.1695977210 | 10.9778482373 |
| H | 95.2858038853  | 59.9766997842 | 8.6876179394  |
| H | 96.7699646447  | 60.9134121437 | 6.8308480489  |
| C | 101.6500025302 | 56.1420050325 | 7.7050016747  |
| N | 102.8032693079 | 56.9982457131 | 7.4195040267  |
| C | 103.3952790678 | 57.8173693921 | 8.2835634765  |
| N | 102.9011438937 | 57.9305426726 | 9.5521800245  |
| N | 104.5302491890 | 58.4406756890 | 7.9564222653  |
| H | 101.7374639585 | 55.2589386273 | 7.0643033779  |
| H | 100.7886343814 | 56.5995588643 | 7.4843450608  |
| H | 101.6262277402 | 55.8261441297 | 8.6535097041  |
| H | 102.9848162971 | 57.1680400965 | 6.4278584716  |
| H | 103.3637279297 | 58.6207543648 | 10.1311214715 |
| H | 101.8917217839 | 58.0043200119 | 9.6119473048  |
| H | 104.8895905007 | 58.3909263402 | 6.9862402538  |
| H | 104.7653623743 | 59.3062631434 | 8.4302643424  |

|   |                |               |               |
|---|----------------|---------------|---------------|
| C | 104.8710007641 | 65.5940002579 | -4.0429946413 |
| C | 104.5731725693 | 64.1027189260 | -3.7678951030 |
| C | 103.9091735444 | 63.8350104411 | -2.4514315814 |
| N | 102.5939689221 | 63.4188796035 | -2.3832480695 |
| C | 104.4320625942 | 63.9539041571 | -1.1821437315 |
| C | 102.3336485687 | 63.2871081480 | -1.0968000933 |
| N | 103.4118511759 | 63.6016543097 | -0.3280772138 |
| H | 105.4142234700 | 65.9758309042 | -3.2952588028 |
| H | 103.9424086746 | 66.1687229542 | -4.1364171476 |
| H | 105.3923872063 | 65.6470935916 | -4.8946699610 |
| H | 105.5196551917 | 63.5459304838 | -3.8293926214 |
| H | 103.9246769506 | 63.7012918509 | -4.5545084711 |
| H | 105.4103497966 | 64.2257212717 | -0.8146116045 |
| H | 103.4370833757 | 63.6039531037 | 0.6852950933  |
| H | 101.3965976048 | 62.9543173952 | -0.6717695477 |
| C | 95.6299754893  | 57.4820327236 | 6.4910616521  |
| C | 97.0572907210  | 57.4342714679 | 7.0617253500  |
| O | 97.8909388810  | 56.6089256284 | 6.2573622336  |
| C | 97.0729266795  | 56.8705448090 | 8.4838398440  |
| H | 94.9871820737  | 58.1576966711 | 7.0749557892  |
| H | 98.0880813051  | 56.9020707439 | 8.8931527618  |
| H | 96.7418278100  | 55.8252540458 | 8.4730577040  |
| H | 96.4145640133  | 57.4351705334 | 9.1550609744  |
| H | 95.1801042508  | 56.4823799247 | 6.5322788700  |
| H | 98.4750313974  | 57.1863108019 | 5.7296002484  |
| H | 97.4693541263  | 58.4516669183 | 7.0827039982  |
| C | 98.4859995970  | 66.3580013689 | -1.7130008536 |
| C | 98.8326025663  | 65.6318367844 | -0.3921302740 |
| C | 98.3206804785  | 66.2781586789 | 0.9049207947  |
| C | 96.8770423838  | 65.9503317109 | 1.2939723214  |
| O | 96.1610312599  | 65.1590082368 | 0.6770295634  |
| N | 96.4176257856  | 66.6236603251 | 2.3944440359  |
| H | 98.7144620346  | 67.3289719275 | -1.6420951234 |
| H | 97.4185143942  | 66.2607641478 | -1.9436733259 |
| H | 99.0290071647  | 65.9401254918 | -2.4413701594 |
| H | 98.4746971134  | 64.5983039864 | -0.4358815781 |
| H | 99.9265437929  | 65.5752873967 | -0.3202859166 |
| H | 98.9502209828  | 65.9509303848 | 1.7454252518  |
| H | 98.4306544178  | 67.3712744077 | 0.8709811306  |
| H | 97.0372789991  | 67.0038321967 | 3.1127197357  |
| H | 95.5270276532  | 66.2949882344 | 2.7443569491  |
| C | 103.6859932412 | 68.3259924853 | 12.1929978377 |
| C | 104.3544696374 | 68.5511527630 | 10.8160898600 |
| C | 103.6815588247 | 67.8426657423 | 9.6203409964  |

|   |                |               |               |
|---|----------------|---------------|---------------|
| C | 103.5498633621 | 66.3054478592 | 9.6882480059  |
| C | 103.1630316883 | 65.7610209190 | 8.3081767616  |
| N | 102.8051335031 | 64.3023734461 | 8.3002231306  |
| H | 104.1085749498 | 67.5601822595 | 12.6777191623 |
| H | 102.6258846567 | 68.0711227818 | 12.0491857696 |
| H | 103.6948491376 | 69.1366814878 | 12.7784182920 |
| H | 104.3619753223 | 69.6237648230 | 10.5831935498 |
| H | 105.4109767062 | 68.2519473780 | 10.8671230862 |
| H | 102.6734373344 | 68.2570747500 | 9.4837915929  |
| H | 104.2473008194 | 68.1081344482 | 8.7152374782  |
| H | 104.4978052567 | 65.8506950192 | 10.0124307660 |
| H | 102.7745029035 | 66.0281929215 | 10.4114879136 |
| H | 102.2830461417 | 66.2818779792 | 7.9254934797  |
| H | 103.9775776150 | 65.8907557234 | 7.5888668825  |
| H | 103.5176195587 | 63.7061066815 | 8.7361446299  |
| H | 101.8708958225 | 64.1147722544 | 8.7448101792  |
| H | 102.7188232445 | 63.9427463679 | 7.3172487310  |
| H | 93.8359308911  | 63.9051845458 | 8.7423664216  |
| H | 95.6198512140  | 57.7972834292 | 5.4686067746  |
| H | 93.3471300233  | 60.0483400109 | 0.1060380145  |
| H | 107.5224150044 | 56.5249252690 | 1.0242612484  |
| H | 100.9179555493 | 56.0972220794 | 3.5518370843  |
| H | 100.6687709988 | 63.8221481108 | 6.3950127388  |
| H | 101.1820486391 | 63.4616624161 | 1.9953292666  |
| H | 101.2579773912 | 60.8045866733 | 3.6433060144  |
| H | 102.9046616207 | 63.2669405431 | 5.7183166931  |
| H | 94.8291929190  | 59.8672868508 | -1.0815080944 |
| C | 95.2420431044  | 60.2379261388 | -2.0081038477 |
| H | 95.8060990000  | 59.4731290000 | -2.5212650000 |
| C | 96.1418054059  | 61.4650256506 | -1.7517851700 |
| C | 97.3361549627  | 61.1745665285 | -0.8597198100 |
| C | 98.2871393300  | 60.2058204093 | -1.2203811315 |
| C | 97.5306058930  | 61.8858044387 | 0.3336361904  |
| C | 99.4021994696  | 59.9592540367 | -0.4191806713 |
| C | 98.6428030272  | 61.6331509532 | 1.1466392836  |
| C | 99.5844141401  | 60.6707756528 | 0.7712114028  |
| H | 94.4016166087  | 60.5140080108 | -2.6590621918 |
| H | 96.4956650449  | 61.8473998174 | -2.7199362485 |
| H | 95.5517641873  | 62.2744071272 | -1.3059872841 |
| H | 96.8336207864  | 62.6758111942 | 0.6043334377  |
| H | 98.1691629034  | 59.6554774664 | -2.1519183387 |
| H | 98.7728315472  | 62.1870287556 | 2.0730390321  |
| H | 100.4657985362 | 60.4829880234 | 1.3781985971  |
| H | 100.1424674091 | 59.2252454770 | -0.7259180070 |

H 105.6161168191 63.0357980069 7.1483376937

**E<sub>4</sub>:**

E=-7419.998753 solv=-0.121227 disp=-225.78 Z0=920.00

|    |                |               |               |
|----|----------------|---------------|---------------|
| V  | 99.5769883037  | 62.5962098495 | 7.2989189658  |
| Fe | 105.7921143745 | 59.7425894852 | 2.2155992754  |
| Fe | 103.3111151276 | 62.3798645680 | 3.6353057308  |
| Fe | 105.7252914515 | 60.9620511268 | 4.9945096774  |
| Fe | 103.3255811245 | 59.3941729791 | 4.0923842133  |
| Fe | 100.4436088808 | 60.1983624185 | 5.8703758513  |
| Fe | 100.7935255189 | 62.6840324444 | 4.7366481101  |
| Fe | 102.9403370405 | 61.5326378642 | 6.0358582091  |
| C  | 102.0010331237 | 60.9192604519 | 4.3423982374  |
| S  | 105.5944819323 | 58.7386607958 | 4.6389062386  |
| S  | 105.2721688767 | 61.8121430602 | 7.2050490101  |
| S  | 105.5762190880 | 62.0782864630 | 2.9770131492  |
| S  | 103.5223051263 | 58.8386227822 | 1.6504081693  |
| S  | 101.6472604300 | 64.0446085680 | 2.8415276489  |
| S  | 98.6411768133  | 61.5732703346 | 5.1679216033  |
| S  | 101.5005636809 | 60.9277711835 | 7.8140299363  |
| C  | 101.0084027811 | 57.6629798599 | 4.5093438994  |
| O  | 102.2688412284 | 57.6229084822 | 4.6935383621  |
| O  | 100.1606402905 | 58.1669762337 | 5.3034898611  |
| O  | 100.5254016505 | 57.1224801766 | 3.3769558614  |
| C  | 97.7770679385  | 66.4616574372 | 5.5515016037  |
| C  | 98.7188168939  | 66.4480739824 | 6.7885885045  |
| C  | 98.3836125393  | 65.3849573677 | 7.8788116824  |
| C  | 97.1397649666  | 65.7920543120 | 8.6985979249  |
| C  | 96.7460705303  | 64.7246114780 | 9.7583626474  |
| C  | 95.2679300045  | 64.4454876270 | 9.8432463475  |
| C  | 99.6066625556  | 65.1867447543 | 8.8091219668  |
| O  | 97.3336579682  | 65.2891585369 | 5.2019496559  |
| O  | 97.5631400230  | 67.5155049155 | 4.9477382135  |
| O  | 94.7691201400  | 63.9749673450 | 8.6452162752  |
| O  | 94.5398622520  | 64.5740852134 | 10.8001508581 |
| O  | 100.1088944982 | 63.9830891602 | 8.8436601019  |
| O  | 100.0548041461 | 66.1563551217 | 9.4290576528  |
| O  | 98.1006715890  | 64.1285139878 | 7.2324730725  |
| H  | 97.8617070801  | 64.4336781990 | 6.2651033847  |
| H  | 99.7186461231  | 66.2263144660 | 6.3925782871  |
| H  | 98.7571779871  | 67.4434283854 | 7.2345002019  |
| H  | 97.3383825838  | 66.7477441108 | 9.1919876278  |
| H  | 96.3182921526  | 65.9509566573 | 7.9911681360  |

|   |                |               |               |
|---|----------------|---------------|---------------|
| H | 97.2280767245  | 63.7746449870 | 9.5015270987  |
| H | 97.0825018014  | 65.0145811527 | 10.7558083136 |
| C | 106.9560121350 | 57.2551224882 | 0.4341029570  |
| H | 107.1594311174 | 57.0761803166 | -0.6264397439 |
| H | 105.8871793303 | 57.1079784786 | 0.6117198552  |
| S | 107.4688725866 | 58.9854228363 | 0.8457944545  |
| C | 93.8526475194  | 61.0191173103 | 1.8430149435  |
| C | 93.7240609936  | 61.1553098029 | 3.3588121824  |
| C | 94.7607224523  | 62.1709757237 | 3.8523814735  |
| C | 94.6525081021  | 62.4825179440 | 5.3373746723  |
| N | 95.8716007165  | 63.1981480686 | 5.8010009030  |
| C | 93.0790262561  | 59.8959600716 | 1.1410743944  |
| H | 94.9161385738  | 60.8902425718 | 1.6006884907  |
| H | 93.5666094490  | 61.9776757804 | 1.3873691137  |
| H | 93.8992053981  | 60.1859369990 | 3.8485132934  |
| H | 92.7050245940  | 61.4683948230 | 3.6333237351  |
| H | 95.7638690197  | 61.7741464291 | 3.6504456625  |
| H | 94.6766569459  | 63.1028241441 | 3.2771955405  |
| H | 94.5761713965  | 61.5621278117 | 5.9266662969  |
| H | 93.7831394030  | 63.1050981385 | 5.5722766700  |
| H | 95.8629737294  | 63.3871114256 | 6.8110831518  |
| H | 96.7422695641  | 62.6337100741 | 5.5942611989  |
| H | 96.0629767511  | 64.1208594301 | 5.3394074887  |
| H | 91.9924723501  | 59.9762043835 | 1.2600733067  |
| H | 93.4048998973  | 58.9145809216 | 1.4526838606  |
| C | 100.0989994261 | 60.0520004018 | 10.8889974887 |
| C | 99.2331028789  | 61.3216834932 | 10.7045287361 |
| C | 98.0431128996  | 61.1051346507 | 9.8364533560  |
| N | 98.0711710321  | 61.3536120442 | 8.4763557928  |
| C | 96.8377827393  | 60.5349201766 | 10.1686426420 |
| C | 96.9220143643  | 60.9120478875 | 7.9932711384  |
| N | 96.1352792583  | 60.4221826300 | 8.9832579126  |
| H | 100.7720110586 | 59.8784112255 | 10.1700238515 |
| H | 99.4566184892  | 59.1702520979 | 11.0154373510 |
| H | 100.5712426961 | 60.2159539540 | 11.7550861749 |
| H | 98.8857087859  | 61.6341601503 | 11.6986251030 |
| H | 99.8366454280  | 62.1403641197 | 10.3043692201 |
| H | 96.4350070970  | 60.1992712579 | 11.1118813126 |
| H | 95.2405093145  | 59.9723319683 | 8.8566468927  |
| H | 96.6719921712  | 60.8759878710 | 6.9453089606  |
| C | 101.6500025323 | 56.1420047335 | 7.7050012703  |
| N | 102.7908129205 | 57.0020362002 | 7.3862963479  |
| C | 103.4147735094 | 57.8152273001 | 8.2258435809  |
| N | 102.9862424166 | 57.9239754666 | 9.5186439369  |

|   |                |               |               |
|---|----------------|---------------|---------------|
| N | 104.5375007607 | 58.4461190496 | 7.8542874609  |
| H | 101.7298996092 | 55.2566735141 | 7.0654543935  |
| H | 100.7886343936 | 56.5995589766 | 7.4843452455  |
| H | 101.6262277447 | 55.8261442668 | 8.6535097498  |
| H | 102.8747510753 | 57.2149644833 | 6.3811498082  |
| H | 103.4879591180 | 58.6003021102 | 10.0809029031 |
| H | 101.9819094390 | 58.0082504512 | 9.6280705897  |
| H | 104.8803701409 | 58.3558747980 | 6.8877178374  |
| H | 104.7435493905 | 59.3444380853 | 8.2772385587  |
| C | 104.8710008319 | 65.5940002335 | -4.0429947877 |
| C | 104.5215227342 | 64.1245329485 | -3.7227552685 |
| C | 103.7658341717 | 63.9604220822 | -2.4352002860 |
| N | 102.4761752507 | 63.4661137716 | -2.4251412559 |
| C | 104.1562355916 | 64.2739568261 | -1.1508924357 |
| C | 102.0984440364 | 63.4858512139 | -1.1614168088 |
| N | 103.0786568252 | 63.9691778264 | -0.3468123633 |
| H | 105.4142234304 | 65.9758308989 | -3.2952587714 |
| H | 103.9558556678 | 66.1898251711 | -4.1448823909 |
| H | 105.3923871924 | 65.6470936369 | -4.8946699667 |
| H | 105.4511499977 | 63.5380814932 | -3.6964468336 |
| H | 103.9046091670 | 63.6970676660 | -4.5208353434 |
| H | 105.0763215772 | 64.6584261232 | -0.7386967939 |
| H | 103.0134841662 | 64.0912588301 | 0.6593421648  |
| H | 101.1382180133 | 63.1611697372 | -0.7831035969 |
| C | 95.6299752425  | 57.4820326802 | 6.4910616665  |
| C | 97.0802235933  | 57.4382359083 | 7.0054419493  |
| O | 97.8780700610  | 56.6346500176 | 6.1415207312  |
| C | 97.1657908826  | 56.8615044901 | 8.4202965019  |
| H | 95.0079441636  | 58.1644844565 | 7.0880483265  |
| H | 98.1979304680  | 56.8981177215 | 8.7851038242  |
| H | 96.8424395227  | 55.8138668331 | 8.4163236959  |
| H | 96.5344757535  | 57.4163954995 | 9.1253560225  |
| H | 95.1790702162  | 56.4835361993 | 6.5414429452  |
| H | 98.5381018183  | 57.2041666871 | 5.6986900971  |
| H | 97.4782166478  | 58.4613628507 | 7.0182731987  |
| C | 98.4859997190  | 66.3580012577 | -1.7130007866 |
| C | 98.8209167938  | 65.6377552264 | -0.3879362362 |
| C | 98.2586050788  | 66.2684388784 | 0.8946027771  |
| C | 96.7822802731  | 65.9832657891 | 1.1776292634  |
| O | 96.0838209282  | 65.2428509273 | 0.4812602218  |
| N | 96.2738902181  | 66.6328846709 | 2.2693428508  |
| H | 98.7144620012  | 67.3289719308 | -1.6420950594 |
| H | 97.4193593757  | 66.2595659974 | -1.9450763372 |
| H | 99.0290071049  | 65.9401255563 | -2.4413702410 |

|   |                |               |               |
|---|----------------|---------------|---------------|
| H | 98.4870898400  | 64.5963743246 | -0.4431649197 |
| H | 99.9136611585  | 65.6070201464 | -0.2861178184 |
| H | 98.8258123906  | 65.8969577224 | 1.7605567663  |
| H | 98.4078309171  | 67.3575764929 | 0.8949661878  |
| H | 96.8570910888  | 66.9818297173 | 3.0341992413  |
| H | 95.3475445974  | 66.3326503135 | 2.5439924623  |
| C | 103.6859934256 | 68.3259925477 | 12.1929979258 |
| C | 104.3551020818 | 68.5494010334 | 10.8146342747 |
| C | 103.6600714809 | 67.8801195552 | 9.6080953105  |
| C | 103.5098413380 | 66.3423993011 | 9.6293060685  |
| C | 103.0945594616 | 65.8524742433 | 8.2367258139  |
| N | 102.7026112102 | 64.4005335353 | 8.1883767735  |
| H | 104.1085748627 | 67.5601822408 | 12.6777192084 |
| H | 102.6260335709 | 68.0703969086 | 12.0496460528 |
| H | 103.6948490763 | 69.1366815010 | 12.7784182745 |
| H | 104.3925138297 | 69.6243898980 | 10.5961686766 |
| H | 105.4030420597 | 68.2203354318 | 10.8570922935 |
| H | 102.6557026236 | 68.3096652793 | 9.4936087015  |
| H | 104.2201660253 | 68.1649791613 | 8.7052217505  |
| H | 104.4553170790 | 65.8650382667 | 9.9264710522  |
| H | 102.7392056347 | 66.0525228933 | 10.3524946245 |
| H | 102.2162205182 | 66.4008310796 | 7.8916645711  |
| H | 103.9009403977 | 65.9907332564 | 7.5100103565  |
| H | 103.4274263764 | 63.7661428899 | 8.5421122489  |
| H | 101.7876761415 | 64.2141832732 | 8.6916859294  |
| H | 102.5115922842 | 64.0962659767 | 7.2132720055  |
| H | 93.8136366718  | 63.8507783652 | 8.8003640335  |
| H | 95.6198514591  | 57.7972834678 | 5.4686067840  |
| H | 93.3471300675  | 60.0483402223 | 0.1060380820  |
| H | 107.5224149816 | 56.5249254271 | 1.0242612284  |
| H | 101.2979781740 | 56.9048842609 | 2.8200316308  |
| H | 100.6448468436 | 63.6885646316 | 6.2131246011  |
| H | 101.3632957679 | 60.5545570422 | 3.5155707038  |
| H | 101.0380759929 | 63.3292476521 | 1.8668706469  |
| H | 103.1670205292 | 63.2342979298 | 5.3082431131  |
| H | 105.5167171508 | 63.0919365840 | 6.8475185263  |
| H | 103.0407792532 | 59.9310258059 | 1.0178906008  |
| H | 94.8291927486  | 59.8672868066 | -1.0815081807 |
| C | 95.2420431659  | 60.2379260526 | -2.0081038516 |
| H | 95.8060990000  | 59.4731290000 | -2.5212650000 |
| C | 96.1304527191  | 61.4760724235 | -1.7702508916 |
| C | 97.3104037205  | 61.2114357274 | -0.8542269731 |
| C | 98.2624223882  | 60.2275871974 | -1.1670689526 |
| C | 97.4761805469  | 61.9496188159 | 0.3264944206  |

|   |                |               |               |
|---|----------------|---------------|---------------|
| C | 99.3452279713  | 59.9813895960 | -0.3229632194 |
| C | 98.5555828287  | 61.7003433093 | 1.1815021149  |
| C | 99.4905099742  | 60.7133927836 | 0.8593112700  |
| H | 94.3984146149  | 60.5039131363 | -2.6595902510 |
| H | 96.4948932327  | 61.8359316124 | -2.7430730301 |
| H | 95.5310961513  | 62.2928478789 | -1.3520081312 |
| H | 96.7748816800  | 62.7474068380 | 0.5599251805  |
| H | 98.1639449922  | 59.6546774138 | -2.0867492033 |
| H | 98.6585581703  | 62.2615570264 | 2.1057176203  |
| H | 100.3237715721 | 60.5078739430 | 1.5244278345  |
| H | 100.0774874025 | 59.2219668760 | -0.5842660126 |

**TS<sub>H-H</sub>:**

E=-7419.972071 solv=-0.123629 disp=-225.01 Z0=918.19

|     |                |               |              |
|-----|----------------|---------------|--------------|
| V1  | 99.5457710000  | 62.4922330000 | 7.2853010000 |
| Fe2 | 105.7444090000 | 59.7089120000 | 2.2166680000 |
| Fe3 | 103.1107520000 | 62.1084610000 | 3.3612230000 |
| Fe4 | 105.3932120000 | 61.1148440000 | 4.8590930000 |
| Fe5 | 103.2830460000 | 59.3100770000 | 4.0207860000 |
| Fe6 | 100.3841390000 | 60.0915690000 | 5.8481970000 |
| Fe7 | 100.7251510000 | 62.5286950000 | 4.6759300000 |
| Fe8 | 102.9212500000 | 61.3967990000 | 5.9196750000 |
| C9  | 101.8859490000 | 60.7873080000 | 4.2752870000 |
| S10 | 105.5539000000 | 58.8590430000 | 4.7073970000 |
| S11 | 105.0856800000 | 62.2892640000 | 6.9659860000 |
| S12 | 105.3791040000 | 62.0679060000 | 2.7486070000 |
| S13 | 103.5290010000 | 58.5656580000 | 1.6433720000 |
| S14 | 101.5779690000 | 63.9533140000 | 2.8357760000 |
| S15 | 98.5846420000  | 61.5109910000 | 5.1746060000 |
| S16 | 101.4804240000 | 60.8221870000 | 7.7693780000 |
| C17 | 100.9996630000 | 57.6305990000 | 4.4553690000 |
| O18 | 102.2451950000 | 57.5625840000 | 4.7149550000 |
| O19 | 100.1091940000 | 58.0596330000 | 5.2500500000 |
| O20 | 100.5908980000 | 57.2370700000 | 3.2390890000 |
| C21 | 97.8107880000  | 66.4418860000 | 5.5434170000 |
| C22 | 98.7568720000  | 66.4017120000 | 6.7780320000 |
| C23 | 98.4097400000  | 65.3316510000 | 7.8556500000 |
| C24 | 97.1594020000  | 65.7385920000 | 8.6675870000 |
| C25 | 96.7538510000  | 64.6722450000 | 9.7233560000 |
| C26 | 95.2679300000  | 64.4454880000 | 9.8432460000 |
| C27 | 99.6254180000  | 65.1199160000 | 8.7869290000 |
| O28 | 97.3009290000  | 65.2909240000 | 5.2142910000 |
| O29 | 97.6551920000  | 67.4982140000 | 4.9275320000 |



|     |                |               |               |
|-----|----------------|---------------|---------------|
| O30 | 94.7303040000  | 63.9850450000 | 8.6584510000  |
| O31 | 94.5661420000  | 64.6049960000 | 10.8143190000 |
| O32 | 100.1391880000 | 63.9198770000 | 8.7851810000  |
| O33 | 100.0651140000 | 66.0713520000 | 9.4391240000  |
| O34 | 98.1328380000  | 64.0865800000 | 7.1901090000  |
| H35 | 97.8886420000  | 64.4203370000 | 6.2331900000  |
| H36 | 99.7537320000  | 66.1742830000 | 6.3764260000  |
| H37 | 98.8100310000  | 67.3917660000 | 7.2344860000  |
| H38 | 97.3556070000  | 66.6932410000 | 9.1637440000  |
| H39 | 96.3449380000  | 65.8996530000 | 7.9527360000  |
| H40 | 97.1944460000  | 63.7097040000 | 9.4414670000  |
| H41 | 97.1271540000  | 64.9379970000 | 10.7142930000 |
| C42 | 106.9972670000 | 57.2519880000 | 0.3964590000  |
| H43 | 107.2891310000 | 57.0897530000 | -0.6457400000 |
| H44 | 105.9198430000 | 57.0931510000 | 0.4869520000  |
| S45 | 107.4518210000 | 58.9801590000 | 0.8643140000  |
| C46 | 93.8478650000  | 61.0192480000 | 1.8457140000  |
| C47 | 93.7082700000  | 61.1527150000 | 3.3601510000  |
| C48 | 94.7402730000  | 62.1680500000 | 3.8615050000  |
| C49 | 94.6195410000  | 62.4782340000 | 5.3455080000  |
| N50 | 95.8388660000  | 63.1883530000 | 5.8178130000  |
| C51 | 93.0790260000  | 59.8959600000 | 1.1410740000  |
| H52 | 94.9128990000  | 60.8916770000 | 1.6099110000  |
| H53 | 93.5631270000  | 61.9778000000 | 1.3893620000  |
| H54 | 93.8812110000  | 60.1827740000 | 3.8494340000  |
| H55 | 92.6869790000  | 61.4643690000 | 3.6276270000  |
| H56 | 95.7450950000  | 61.7716620000 | 3.6671060000  |
| H57 | 94.6601220000  | 63.1001760000 | 3.2861960000  |
| H58 | 94.5354110000  | 61.5577890000 | 5.9335890000  |
| H59 | 93.7507500000  | 63.1041680000 | 5.5737770000  |
| H60 | 95.8203840000  | 63.3799820000 | 6.8267940000  |
| H61 | 96.7081610000  | 62.6171700000 | 5.6187560000  |
| H62 | 96.0345330000  | 64.1072790000 | 5.3537130000  |
| H63 | 91.9921330000  | 59.9747840000 | 1.2582510000  |
| H64 | 93.4049000000  | 58.9145810000 | 1.4526840000  |
| C65 | 100.0989990000 | 60.0520000000 | 10.8889970000 |
| C66 | 99.2305590000  | 61.3181370000 | 10.7042190000 |
| C67 | 98.0329700000  | 61.0935370000 | 9.8497090000  |
| N68 | 98.0450650000  | 61.3321260000 | 8.4871430000  |
| C69 | 96.8296840000  | 60.5296460000 | 10.1987950000 |
| C70 | 96.8864810000  | 60.8942740000 | 8.0202620000  |
| N71 | 96.1118920000  | 60.4136620000 | 9.0234430000  |
| H72 | 100.7720110000 | 59.8784110000 | 10.1700240000 |
| H73 | 99.4592380000  | 59.1683890000 | 11.0175210000 |

|      |                |               |               |
|------|----------------|---------------|---------------|
| H74  | 100.5712430000 | 60.2159540000 | 11.7550860000 |
| H75  | 98.8909770000  | 61.6375230000 | 11.6986580000 |
| H76  | 99.8280050000  | 62.1354160000 | 10.2922930000 |
| H77  | 96.4371730000  | 60.2009250000 | 11.1486010000 |
| H78  | 95.2135500000  | 59.9675490000 | 8.9107900000  |
| H79  | 96.6212720000  | 60.8549370000 | 6.9764100000  |
| C80  | 101.6500030000 | 56.1420050000 | 7.7050010000  |
| N81  | 102.7793340000 | 57.0229090000 | 7.4027620000  |
| C82  | 103.3772590000 | 57.8386720000 | 8.2564840000  |
| N83  | 102.9433450000 | 57.9067460000 | 9.5515500000  |
| N84  | 104.4805280000 | 58.5156240000 | 7.9017850000  |
| H85  | 101.7423460000 | 55.2628090000 | 7.0593890000  |
| H86  | 100.7886340000 | 56.5995590000 | 7.4843450000  |
| H87  | 101.6262280000 | 55.8261440000 | 8.6535100000  |
| H88  | 102.8607320000 | 57.2425580000 | 6.3977570000  |
| H89  | 103.4287110000 | 58.5806970000 | 10.1301660000 |
| H90  | 101.9369150000 | 57.9681770000 | 9.6576700000  |
| H91  | 104.8248620000 | 58.4650250000 | 6.9300080000  |
| H92  | 104.6344800000 | 59.4181310000 | 8.3355620000  |
| C93  | 104.8710010000 | 65.5940000000 | -4.0429950000 |
| C94  | 104.5661300000 | 64.1051970000 | -3.7544400000 |
| C95  | 103.8796580000 | 63.8578870000 | -2.4440670000 |
| N96  | 102.5126670000 | 63.6677540000 | -2.3771210000 |
| C97  | 104.4215260000 | 63.8163750000 | -1.1779440000 |
| C98  | 102.2377450000 | 63.5119110000 | -1.0971380000 |
| N99  | 103.3591570000 | 63.6013450000 | -0.3259370000 |
| H100 | 105.4142230000 | 65.9758310000 | -3.2952590000 |
| H101 | 103.9435550000 | 66.1703340000 | -4.1375080000 |
| H102 | 105.3923870000 | 65.6470940000 | -4.8946700000 |
| H103 | 105.5120130000 | 63.5463800000 | -3.7870480000 |
| H104 | 103.9312690000 | 63.6985170000 | -4.5497210000 |
| H105 | 105.4332050000 | 63.9003610000 | -0.8098690000 |
| H106 | 103.4058080000 | 63.5185160000 | 0.6834690000  |
| H107 | 101.2539510000 | 63.3273040000 | -0.6852670000 |
| C108 | 95.6299750000  | 57.4820330000 | 6.4910620000  |
| C109 | 97.0817040000  | 57.3835950000 | 6.9926400000  |
| O110 | 97.8404580000  | 56.5604210000 | 6.1149290000  |
| C111 | 97.1627590000  | 56.7904820000 | 8.4018770000  |
| H112 | 95.0387390000  | 58.1871490000 | 7.0932080000  |
| H113 | 98.1994730000  | 56.7888040000 | 8.7553180000  |
| H114 | 96.8054090000  | 55.7538020000 | 8.3911230000  |
| H115 | 96.5578120000  | 57.3584230000 | 9.1197930000  |
| H116 | 95.1431100000  | 56.5009880000 | 6.5463970000  |
| H117 | 98.5021990000  | 57.1150330000 | 5.6567860000  |

|      |                |               |               |
|------|----------------|---------------|---------------|
| H118 | 97.5140270000  | 58.3932280000 | 7.0074410000  |
| C119 | 98.4860000000  | 66.3580010000 | -1.7130010000 |
| C120 | 98.8184220000  | 65.6355080000 | -0.3885080000 |
| C121 | 98.2718480000  | 66.2761820000 | 0.8956560000  |
| C122 | 96.7891400000  | 66.0254470000 | 1.1772650000  |
| O123 | 96.0726830000  | 65.3079980000 | 0.4759790000  |
| N124 | 96.2956730000  | 66.6828010000 | 2.2718890000  |
| H125 | 98.7144620000  | 67.3289720000 | -1.6420950000 |
| H126 | 97.4195030000  | 66.2611860000 | -1.9453770000 |
| H127 | 99.0290070000  | 65.9401260000 | -2.4413700000 |
| H128 | 98.4697710000  | 64.5985750000 | -0.4406920000 |
| H129 | 99.9112830000  | 65.5916380000 | -0.2939290000 |
| H130 | 98.8314190000  | 65.8922750000 | 1.7612780000  |
| H131 | 98.4457180000  | 67.3616640000 | 0.8963610000  |
| H132 | 96.8893350000  | 67.0062680000 | 3.0397940000  |
| H133 | 95.3633370000  | 66.4000900000 | 2.5453530000  |
| C134 | 103.6859930000 | 68.3259930000 | 12.1929980000 |
| C135 | 104.3579000000 | 68.5573990000 | 10.8196080000 |
| C136 | 103.6849870000 | 67.8503040000 | 9.6245140000  |
| C137 | 103.5322660000 | 66.3175980000 | 9.7160980000  |
| C138 | 103.1340160000 | 65.7556400000 | 8.3486290000  |
| N139 | 102.7516090000 | 64.3019250000 | 8.3910390000  |
| H140 | 104.1085750000 | 67.5601820000 | 12.6777190000 |
| H141 | 102.6256620000 | 68.0727720000 | 12.0480040000 |
| H142 | 103.6948490000 | 69.1366820000 | 12.7784180000 |
| H143 | 104.3658710000 | 69.6305410000 | 10.5900040000 |
| H144 | 105.4138880000 | 68.2568310000 | 10.8714840000 |
| H145 | 102.6836030000 | 68.2762940000 | 9.4757430000  |
| H146 | 104.2610170000 | 68.0955380000 | 8.7203260000  |
| H147 | 104.4739820000 | 65.8543940000 | 10.0462820000 |
| H148 | 102.7540410000 | 66.0634410000 | 10.4447010000 |
| H149 | 102.2602440000 | 66.2810620000 | 7.9593830000  |
| H150 | 103.9525080000 | 65.8514450000 | 7.6288410000  |
| H151 | 103.4593340000 | 63.7151260000 | 8.8443860000  |
| H152 | 101.7907950000 | 64.1413470000 | 8.8214810000  |
| H153 | 102.6606580000 | 63.9092890000 | 7.4417230000  |
| H154 | 93.7738650000  | 63.8949970000 | 8.8304010000  |
| H155 | 95.6198510000  | 57.7972830000 | 5.4686070000  |
| H156 | 93.3471300000  | 60.0483400000 | 0.1060380000  |
| H157 | 107.5224150000 | 56.5249260000 | 1.0242610000  |
| H158 | 101.3974430000 | 57.1056240000 | 2.6966240000  |
| H159 | 100.8244170000 | 63.5276780000 | 6.0653380000  |
| H160 | 101.2128600000 | 60.3891070000 | 3.4920930000  |
| H161 | 100.9182030000 | 63.4034170000 | 1.7900770000  |

|      |                |               |               |
|------|----------------|---------------|---------------|
| H162 | 101.9395330000 | 63.1485280000 | 5.6074640000  |
| H163 | 105.3078910000 | 63.4552050000 | 6.3162300000  |
| H164 | 103.0036920000 | 59.5876550000 | 0.9334710000  |
| H165 | 94.8291930000  | 59.8672870000 | -1.0815080000 |
| C166 | 95.2420430000  | 60.2379260000 | -2.0081040000 |
| H167 | 95.8060990000  | 59.4731290000 | -2.5212650000 |
| C168 | 96.1501350000  | 61.4613500000 | -1.7653720000 |
| C169 | 97.3436400000  | 61.1561100000 | -0.8788730000 |
| C170 | 98.2414610000  | 60.1272070000 | -1.2071970000 |
| C171 | 97.5765790000  | 61.8972800000 | 0.2883200000  |
| C172 | 99.3346720000  | 59.8378720000 | -0.3898130000 |
| C173 | 98.6673520000  | 61.6057360000 | 1.1157280000  |
| C174 | 99.5466780000  | 60.5728310000 | 0.7803020000  |
| H175 | 94.4008580000  | 60.5125690000 | -2.6590090000 |
| H176 | 96.5061180000  | 61.8301860000 | -2.7379560000 |
| H177 | 95.5714460000  | 62.2816930000 | -1.3249020000 |
| H178 | 96.9193770000  | 62.7290170000 | 0.5327430000  |
| H179 | 98.0916040000  | 59.5514320000 | -2.1181930000 |
| H180 | 98.8229680000  | 62.1708850000 | 2.0301300000  |
| H181 | 100.3888230000 | 60.3372660000 | 1.4239300000  |
| H182 | 100.0224940000 | 59.0420220000 | -0.6633500000 |

**E<sub>4</sub>-H<sub>2</sub>:**

E=-7418.805768 solv=-0.126742 disp=-219.97 Z0=912.05

|    |                |               |              |
|----|----------------|---------------|--------------|
| V  | 99.3419603927  | 62.2438675322 | 7.3458828526 |
| Fe | 105.6261958434 | 59.8508360717 | 2.1116324734 |
| Fe | 102.7668731355 | 61.9293141547 | 3.1009935752 |
| Fe | 104.9793475420 | 61.4030814789 | 4.5095804908 |
| Fe | 103.2443100027 | 59.2469558036 | 3.9407103313 |
| Fe | 100.2181516671 | 59.9938485534 | 5.6813385822 |
| Fe | 100.1559932228 | 62.0351618813 | 4.1278268490 |
| Fe | 102.5213265372 | 61.4948342741 | 5.6767344969 |
| C  | 101.6811559693 | 60.5712037227 | 4.0894311939 |
| S  | 105.5172592438 | 59.2003753504 | 4.6558577483 |
| S  | 104.4616243728 | 62.9726768174 | 6.3720092376 |
| S  | 105.0058427197 | 62.2026856107 | 2.3257569781 |
| S  | 103.5112206030 | 58.4213316064 | 1.5968154725 |
| S  | 101.1811024829 | 63.8267503874 | 2.7802757602 |
| S  | 98.2383977018  | 61.3142696016 | 5.2936038469 |
| S  | 101.4032189463 | 60.8175762126 | 7.6680587275 |
| C  | 101.0573287061 | 57.5158271210 | 4.4719540394 |
| O  | 102.3096954152 | 57.4317889123 | 4.6964822063 |
| O  | 100.1831061207 | 57.8877845276 | 5.3148326825 |

|   |                |               |               |
|---|----------------|---------------|---------------|
| O | 100.6219161155 | 57.2110063366 | 3.2384797168  |
| C | 97.5984106359  | 66.1957450675 | 5.4457124279  |
| C | 98.6375049754  | 66.1804389720 | 6.6052766465  |
| C | 98.3252111341  | 65.1816155255 | 7.7564814777  |
| C | 97.1191568337  | 65.6683764978 | 8.5899815214  |
| C | 96.7493430118  | 64.7091228125 | 9.7557876676  |
| C | 95.2679299516  | 64.4454876816 | 9.8432466558  |
| C | 99.5719965813  | 64.9964063508 | 8.6479279654  |
| O | 96.9484008511  | 65.0833209995 | 5.2740643824  |
| O | 97.4963681812  | 67.2055083346 | 4.7464174630  |
| O | 94.7034418897  | 64.8453938376 | 10.9979020230 |
| O | 94.6045553375  | 63.9118974126 | 8.9614800354  |
| O | 100.1077443926 | 63.8041593958 | 8.6229769253  |
| O | 100.0111451246 | 65.9501825121 | 9.2959985235  |
| O | 98.0079967397  | 63.9062453750 | 7.1745797547  |
| H | 97.6154025888  | 64.1808448148 | 6.2567512393  |
| H | 99.5969781438  | 65.9021399943 | 6.1473159518  |
| H | 98.7567230607  | 67.1911704147 | 7.0008031963  |
| H | 97.3452304812  | 66.6607491821 | 8.9895447205  |
| H | 96.2748685166  | 65.7702544873 | 7.9000847560  |
| H | 97.2076553376  | 63.7309343228 | 9.5740398338  |
| H | 97.1210787594  | 65.0871919590 | 10.7099679519 |
| C | 106.9286360880 | 57.2473498887 | 0.4506855249  |
| H | 107.1283190807 | 57.0898319511 | -0.6138883521 |
| H | 105.8677037851 | 57.0666728927 | 0.6368876867  |
| S | 107.3864001375 | 58.9887055477 | 0.8772804326  |
| C | 93.8113007402  | 61.0033810146 | 1.9075432331  |
| C | 93.5428302485  | 61.1007905289 | 3.4104820778  |
| C | 94.5184365152  | 62.1011609580 | 4.0405472472  |
| C | 94.2722298061  | 62.3512531630 | 5.5233083328  |
| N | 95.4430931044  | 63.0637580296 | 6.1171743272  |
| C | 93.0790262864  | 59.8959600207 | 1.1410742500  |
| H | 94.8890657302  | 60.8603356095 | 1.7575720151  |
| H | 93.5763380045  | 61.9742179468 | 1.4494225520  |
| H | 93.6732628400  | 60.1166831841 | 3.8844506503  |
| H | 92.4998782783  | 61.4022298755 | 3.5924098027  |
| H | 95.5407233627  | 61.7212357528 | 3.9174486539  |
| H | 94.4764081819  | 63.0571880070 | 3.5017432449  |
| H | 94.1590170971  | 61.4089531031 | 6.0706403260  |
| H | 93.3802290704  | 62.9573197447 | 5.7084022043  |
| H | 95.3223747302  | 63.2703140009 | 7.1226493834  |
| H | 96.3109717627  | 62.4899852419 | 5.9809280574  |
| H | 95.6829103452  | 63.9675010348 | 5.6423573432  |
| H | 91.9887634423  | 59.9610170834 | 1.2423579599  |

|   |                |               |               |
|---|----------------|---------------|---------------|
| H | 93.4048998960  | 58.9145809269 | 1.4526838786  |
| C | 100.0989994288 | 60.0520002989 | 10.8889973403 |
| C | 99.2145043759  | 61.3110502595 | 10.7215298722 |
| C | 97.9568018465  | 61.0496275517 | 9.9701087687  |
| N | 97.8839304998  | 61.2105507394 | 8.5993561722  |
| C | 96.7759365619  | 60.5146948588 | 10.4236103026 |
| C | 96.6991607359  | 60.7508888615 | 8.2265128710  |
| N | 95.9901394322  | 60.3307444985 | 9.3012259150  |
| H | 100.7720111624 | 59.8784112627 | 10.1700239397 |
| H | 99.4678413101  | 59.1630144605 | 11.0181665004 |
| H | 100.5712426781 | 60.2159539797 | 11.7550861797 |
| H | 98.9481213966  | 61.6699752453 | 11.7247281140 |
| H | 99.7768187194  | 62.1117455537 | 10.2342716932 |
| H | 96.4437117009  | 60.2369851729 | 11.4118457639 |
| H | 95.0746253015  | 59.9067706381 | 9.2710903066  |
| H | 96.3695486502  | 60.6567413626 | 7.2046335264  |
| C | 101.6500024717 | 56.1420048671 | 7.7050012277  |
| N | 102.7830381972 | 57.0058999736 | 7.3686960653  |
| C | 103.3019803952 | 57.9316914950 | 8.1586750642  |
| N | 102.8596614069 | 58.0582778786 | 9.4460214086  |
| N | 104.3498651821 | 58.6748126972 | 7.7595934112  |
| H | 101.7269804881 | 55.2573815113 | 7.0653877395  |
| H | 100.7886343488 | 56.5995589210 | 7.4843453045  |
| H | 101.6262277914 | 55.8261442367 | 8.6535097409  |
| H | 102.8436314932 | 57.1831697884 | 6.3495783693  |
| H | 103.2486784757 | 58.8464093024 | 9.9480065494  |
| H | 101.8530771345 | 58.0074120783 | 9.5513040414  |
| H | 104.6900512801 | 58.5955762229 | 6.7898359575  |
| H | 104.3558122494 | 59.6364491974 | 8.0815736530  |
| C | 104.8710008268 | 65.5940002333 | -4.0429947813 |
| C | 104.4922311003 | 64.1312175938 | -3.7330940206 |
| C | 103.7691196786 | 63.9710919740 | -2.4272944123 |
| N | 102.4405815004 | 63.5953273921 | -2.3843891584 |
| C | 104.2453011745 | 64.1572690705 | -1.1475008904 |
| C | 102.1228505406 | 63.5681030739 | -1.1043944785 |
| N | 103.1781336283 | 63.9103847189 | -0.3135420179 |
| H | 105.4142234317 | 65.9758308992 | -3.2952587725 |
| H | 103.9636427456 | 66.2024738087 | -4.1450530408 |
| H | 105.3923871904 | 65.6470936342 | -4.8946699680 |
| H | 105.4006131970 | 63.5118336418 | -3.7416370612 |
| H | 103.8406475873 | 63.7366476333 | -4.5205546992 |
| H | 105.2204176096 | 64.4032175209 | -0.7553770636 |
| H | 103.2123423576 | 63.8682941300 | 0.6987518693  |
| H | 101.1465607415 | 63.3322796629 | -0.7039243950 |

|   |                |               |               |
|---|----------------|---------------|---------------|
| C | 95.6299752577  | 57.4820327132 | 6.4910617008  |
| C | 97.0829669290  | 57.3963422416 | 6.9837063784  |
| O | 97.8278131955  | 56.5485149229 | 6.1166028779  |
| C | 97.1770940579  | 56.8481347306 | 8.4110130547  |
| H | 95.0373733223  | 58.1853537856 | 7.0942538283  |
| H | 98.2180758817  | 56.8520011120 | 8.7525550371  |
| H | 96.8149532238  | 55.8133179897 | 8.4391736158  |
| H | 96.5837479324  | 57.4429362507 | 9.1176787764  |
| H | 95.1491260747  | 56.4977132602 | 6.5484076616  |
| H | 98.5454357318  | 57.0765183612 | 5.7127107771  |
| H | 97.5147157417  | 58.4063312328 | 6.9621324773  |
| C | 98.4859998146  | 66.3580012676 | -1.7130009238 |
| C | 98.8079234926  | 65.6210425660 | -0.3965608585 |
| C | 98.1485869790  | 66.1792762962 | 0.8701410681  |
| C | 96.6880041241  | 65.7698853675 | 1.0719199900  |
| O | 96.0754599819  | 65.0230164619 | 0.3078608888  |
| N | 96.0972258907  | 66.3195756891 | 2.1780874688  |
| H | 98.7144619427  | 67.3289719409 | -1.6420950074 |
| H | 97.4207289136  | 66.2594700235 | -1.9526588819 |
| H | 99.0290070848  | 65.9401255304 | -2.4413702410 |
| H | 98.5289989407  | 64.5658410254 | -0.4972325124 |
| H | 99.8952268455  | 65.6449129124 | -0.2478168568 |
| H | 98.7032140298  | 65.8355277865 | 1.7548474754  |
| H | 98.2096017094  | 67.2766951834 | 0.8963638823  |
| H | 96.6425899707  | 66.6746114482 | 2.9683712955  |
| H | 95.1948203997  | 65.9277607829 | 2.4142118378  |
| C | 103.6859934727 | 68.3259927689 | 12.1929980688 |
| C | 104.3596423233 | 68.5568709564 | 10.8248494119 |
| C | 103.7255680217 | 67.7561563549 | 9.6725764962  |
| C | 103.5491779679 | 66.2502865948 | 9.9373224458  |
| C | 103.1628928839 | 65.5264530174 | 8.6508835028  |
| N | 102.7746234820 | 64.0888885001 | 8.8793263503  |
| H | 104.1085748123 | 67.5601821431 | 12.6777190980 |
| H | 102.6249637217 | 68.0773648283 | 12.0468689903 |
| H | 103.6948490738 | 69.1366814775 | 12.7784183072 |
| H | 104.3130143366 | 69.6198221985 | 10.5568902352 |
| H | 105.4285947063 | 68.3120259378 | 10.8967522919 |
| H | 102.7353300588 | 68.1738831015 | 9.4460770153  |
| H | 104.3347084445 | 67.8962930861 | 8.7684894084  |
| H | 104.4804802036 | 65.8191088156 | 10.3358052113 |
| H | 102.7623431667 | 66.0965096028 | 10.6854176780 |
| H | 102.2989335186 | 66.0050991212 | 8.1877743201  |
| H | 103.9930985738 | 65.5182591168 | 7.9399313795  |
| H | 103.2192862038 | 63.7025468204 | 9.7150267629  |

|   |                |               |               |
|---|----------------|---------------|---------------|
| H | 101.7185431746 | 63.9590506898 | 8.9461702324  |
| H | 103.1004429411 | 63.5104421858 | 8.0718993973  |
| H | 93.7528595854  | 64.6299205460 | 10.9305088294 |
| H | 95.6198514253  | 57.7972834390 | 5.4686067755  |
| H | 93.3471299997  | 60.0483402012 | 0.1060380514  |
| H | 107.5224149812 | 56.5249253785 | 1.0242611400  |
| H | 101.4167397938 | 57.1158772706 | 2.6672288573  |
| H | 101.1227524502 | 60.0468656321 | 3.2854511630  |
| H | 102.9325455831 | 59.3887901720 | 0.8529523930  |
| H | 104.2816430860 | 63.9978197085 | 5.5099584164  |
| H | 100.5729528161 | 63.3856035443 | 1.6520200164  |
| H | 94.8291928814  | 59.8672868581 | -1.0815080931 |
| C | 95.2420430298  | 60.2379260013 | -2.0081039438 |
| H | 95.8060990000  | 59.4731290000 | -2.5212650000 |
| C | 96.1460027879  | 61.4706609703 | -1.7805617951 |
| C | 97.4026786559  | 61.1148953315 | -1.0152713356 |
| C | 98.4613177250  | 60.4489973873 | -1.6528111762 |
| C | 97.5134052500  | 61.3821206873 | 0.3551648682  |
| C | 99.5895984281  | 60.0419845476 | -0.9402051108 |
| C | 98.6285644238  | 60.9529737550 | 1.0794143629  |
| C | 99.6688349927  | 60.2788697729 | 0.4351189374  |
| H | 94.3933261611  | 60.5070673744 | -2.6525484673 |
| H | 96.4178418294  | 61.8893291641 | -2.7586841677 |
| H | 95.5992941166  | 62.2581138289 | -1.2489075927 |
| H | 96.7274369955  | 61.9439492806 | 0.8531108674  |
| H | 98.4036242423  | 60.2556006082 | -2.7223819356 |
| H | 98.6726643124  | 61.1313413266 | 2.1515042663  |
| H | 100.5335726401 | 59.9377514228 | 0.9964252360  |
| H | 100.4039554855 | 59.5377408624 | -1.4532408938 |

**E<sub>4</sub>-H<sub>2</sub>+N<sub>2</sub>:**

E=-7528.325102 solv=-0.125513 disp=-228.50 Z0=917.57

|    |                |               |              |
|----|----------------|---------------|--------------|
| V  | 99.3444026141  | 62.4239355603 | 7.2481404312 |
| Fe | 105.5311852272 | 59.6764729239 | 2.0859204592 |
| Fe | 102.8647174939 | 61.7783159566 | 3.0925525940 |
| Fe | 105.0500102295 | 61.1738354139 | 4.5683644104 |
| Fe | 103.1557125596 | 59.1539238149 | 3.9630005341 |
| Fe | 100.1949254882 | 60.0298051855 | 5.8239499759 |
| Fe | 100.4332756875 | 62.4185517389 | 4.4112468642 |
| Fe | 102.6569588216 | 61.4026706909 | 5.7521709598 |
| C  | 101.6885270847 | 60.5876227023 | 4.2208642389 |
| S  | 105.4414793246 | 58.9272125061 | 4.6403566192 |
| S  | 104.6714838449 | 62.6468019955 | 6.5734213444 |



|   |                |               |               |
|---|----------------|---------------|---------------|
| S | 105.0993007560 | 62.0578422598 | 2.4129876049  |
| S | 103.3515359383 | 58.3453748178 | 1.6082681644  |
| S | 101.1415260787 | 63.4249059107 | 2.3115658723  |
| S | 98.3479793893  | 61.4104342378 | 5.2089472361  |
| S | 101.3231409418 | 60.8603075200 | 7.7001000145  |
| C | 100.9016748232 | 57.5295531553 | 4.4833322124  |
| O | 102.1470968061 | 57.4042154232 | 4.7127634953  |
| O | 100.0424837262 | 57.9479702996 | 5.3181113921  |
| O | 100.4551507082 | 57.2213135704 | 3.2550490947  |
| C | 97.4565828293  | 66.3495576206 | 5.4381517596  |
| C | 98.4808691275  | 66.3854159056 | 6.6059723859  |
| C | 98.2625268142  | 65.3222771907 | 7.7212832678  |
| C | 97.0694145908  | 65.7372687580 | 8.6093938151  |
| C | 96.7442252117  | 64.7229335989 | 9.7377038127  |
| C | 95.2679299571  | 64.4454876642 | 9.8432466085  |
| C | 99.5390519878  | 65.1476456696 | 8.5736745377  |
| O | 96.9180485354  | 65.1864403332 | 5.2050283358  |
| O | 97.2671254759  | 67.3670585439 | 4.7725496568  |
| O | 94.7326823060  | 64.7164253335 | 11.0467903381 |
| O | 94.5844968032  | 63.9987124249 | 8.9289882067  |
| O | 100.0689260224 | 63.9527086566 | 8.5539504301  |
| O | 99.9906575075  | 66.1036649972 | 9.2062647573  |
| O | 97.9723570723  | 64.0549283134 | 7.1062924228  |
| H | 97.5943307814  | 64.3398906333 | 6.1761068272  |
| H | 99.4666475994  | 66.2308044951 | 6.1532071917  |
| H | 98.4932118108  | 67.3869188552 | 7.0412460727  |
| H | 97.2880667332  | 66.7149487427 | 9.0479058097  |
| H | 96.2031230045  | 65.8549824030 | 7.9493844794  |
| H | 97.2027703258  | 63.7580103868 | 9.4933694392  |
| H | 97.1391915567  | 65.0544846287 | 10.6998987034 |
| C | 106.8849835817 | 57.1600745179 | 0.3994080483  |
| H | 107.1058218752 | 56.9467025370 | -0.6512859523 |
| H | 105.8360928784 | 56.9199207438 | 0.5922123802  |
| S | 107.2283519082 | 58.9476726669 | 0.7187917744  |
| C | 93.8203414014  | 61.0088926624 | 1.8977834228  |
| C | 93.5539716612  | 61.1430302225 | 3.3998774661  |
| C | 94.5312427808  | 62.1587587981 | 4.0113618095  |
| C | 94.2402895014  | 62.4762351159 | 5.4738869473  |
| N | 95.3861095459  | 63.2163896529 | 6.0900060754  |
| C | 93.0790262759  | 59.8959600311 | 1.1410742722  |
| H | 94.8967043664  | 60.8546126144 | 1.7495932939  |
| H | 93.5929879269  | 61.9730049317 | 1.4219499720  |
| H | 93.6797871901  | 60.1704991415 | 3.8982675604  |
| H | 92.5120246821  | 61.4530711110 | 3.5731706824  |

|   |                |               |               |
|---|----------------|---------------|---------------|
| H | 95.5519913028  | 61.7625700960 | 3.9324929550  |
| H | 94.5154153078  | 63.0906547665 | 3.4308846659  |
| H | 94.1031768372  | 61.5610330744 | 6.0602225669  |
| H | 93.3444418757  | 63.0920366099 | 5.5978453244  |
| H | 95.2196485326  | 63.4487253763 | 7.0856131080  |
| H | 96.2546311015  | 62.6499993421 | 6.0159729410  |
| H | 95.6526411616  | 64.1106518671 | 5.6006997809  |
| H | 91.9892883205  | 59.9641364406 | 1.2454227932  |
| H | 93.4048998940  | 58.9145809260 | 1.4526838781  |
| C | 100.0989994092 | 60.0520002798 | 10.8889973433 |
| C | 99.2157874025  | 61.3072069251 | 10.6808374196 |
| C | 97.9918934216  | 61.0389996687 | 9.8729802145  |
| N | 97.9312900751  | 61.2971258188 | 8.5158602925  |
| C | 96.8318168313  | 60.4129105836 | 10.2624972676 |
| C | 96.7763858136  | 60.8065370683 | 8.0883991320  |
| N | 96.0730444229  | 60.2751470198 | 9.1165271311  |
| H | 100.7720111624 | 59.8784112777 | 10.1700239361 |
| H | 99.4676023316  | 59.1631913017 | 11.0177993561 |
| H | 100.5712426843 | 60.2159539895 | 11.7550861745 |
| H | 98.9074861935  | 61.6695666610 | 11.6708550519 |
| H | 99.7934294288  | 62.1074164470 | 10.2101394811 |
| H | 96.4996220167  | 60.0451602894 | 11.2212844798 |
| H | 95.1904905380  | 59.7922217252 | 9.0343466606  |
| H | 96.4756100137  | 60.7577917083 | 7.0539812628  |
| C | 101.6500024713 | 56.1420048569 | 7.7050012252  |
| N | 102.7760432034 | 57.0149967715 | 7.3759578237  |
| C | 103.3324926511 | 57.9006367645 | 8.1862163897  |
| N | 102.9007264791 | 58.0072090655 | 9.4792837119  |
| N | 104.3988038239 | 58.6143554105 | 7.7933313786  |
| H | 101.7330546193 | 55.2595851257 | 7.0633716163  |
| H | 100.7886343466 | 56.5995589119 | 7.4843452953  |
| H | 101.6262277944 | 55.8261442528 | 8.6535097465  |
| H | 102.8322321567 | 57.2011567779 | 6.3616555048  |
| H | 103.3354746009 | 58.7472490358 | 10.0151631873 |
| H | 101.8937850460 | 57.9965211545 | 9.5923695283  |
| H | 104.7356536628 | 58.5425908738 | 6.8190976406  |
| H | 104.4997156148 | 59.5451977275 | 8.1791249334  |
| C | 104.8710007885 | 65.5940002316 | -4.0429947344 |
| C | 104.5093085152 | 64.1190891336 | -3.7730218481 |
| C | 103.7681598937 | 63.9051476127 | -2.4915029383 |
| N | 102.4198549568 | 63.6054847412 | -2.4750817490 |
| C | 104.2454998341 | 64.0052974173 | -1.2055682642 |
| C | 102.0960426269 | 63.5298874066 | -1.1974513435 |
| N | 103.1660046866 | 63.7695804850 | -0.3901771505 |

|   |                |               |               |
|---|----------------|---------------|---------------|
| H | 105.4142234687 | 65.9758308900 | -3.2952587947 |
| H | 103.9589530670 | 66.1951221094 | -4.1439272624 |
| H | 105.3923871876 | 65.6470936334 | -4.8946699698 |
| H | 105.4329987590 | 63.5282263644 | -3.7832082459 |
| H | 103.8836683481 | 63.7383768654 | -4.5884262649 |
| H | 105.2329650782 | 64.1872130358 | -0.8069729244 |
| H | 103.1663567401 | 63.7306702522 | 0.6224220075  |
| H | 101.1137993091 | 63.3159616103 | -0.7976748874 |
| C | 95.6299752713  | 57.4820327184 | 6.4910617019  |
| C | 97.0650476620  | 57.3346675451 | 7.0183074282  |
| O | 97.8151561501  | 56.4859681598 | 6.1613547642  |
| C | 97.0872677850  | 56.7360027690 | 8.4286762370  |
| H | 95.0501833858  | 58.2008649399 | 7.0895016096  |
| H | 98.1148897822  | 56.6879724899 | 8.8053643804  |
| H | 96.6866901792  | 55.7153793520 | 8.4052182207  |
| H | 96.4896015647  | 57.3258348943 | 9.1354267014  |
| H | 95.1117328317  | 56.5159609770 | 6.5437290546  |
| H | 98.4816038799  | 57.0356324182 | 5.7013343197  |
| H | 97.5308419641  | 58.3302346516 | 7.0474641485  |
| C | 98.4859998204  | 66.3580012255 | -1.7130009438 |
| C | 98.7936620554  | 65.6218776713 | -0.3932787668 |
| C | 98.1378245527  | 66.1948842750 | 0.8692464238  |
| C | 96.6526007720  | 65.8662018665 | 1.0283508338  |
| O | 96.0368295411  | 65.1213847850 | 0.2659993076  |
| N | 96.0394191880  | 66.4823957653 | 2.0875541928  |
| H | 98.7144619475  | 67.3289719373 | -1.6420949733 |
| H | 97.4216623054  | 66.2645576014 | -1.9594431287 |
| H | 99.0290070816  | 65.9401255562 | -2.4413702582 |
| H | 98.4983916331  | 64.5709344368 | -0.4892847559 |
| H | 99.8794950644  | 65.6268966376 | -0.2359008338 |
| H | 98.6513358071  | 65.7938760556 | 1.7549281606  |
| H | 98.2637668743  | 67.2857031279 | 0.9219979585  |
| H | 96.5581345450  | 66.8335420447 | 2.8958878422  |
| H | 95.1084815496  | 66.1412659131 | 2.2890944304  |
| C | 103.6859934056 | 68.3259927241 | 12.1929980484 |
| C | 104.3748127764 | 68.5684123959 | 10.8330310894 |
| C | 103.7520293948 | 67.7939677176 | 9.6571187397  |
| C | 103.5486574911 | 66.2871255601 | 9.8939916939  |
| C | 103.2054628086 | 65.5829079297 | 8.5841757761  |
| N | 102.7573533081 | 64.1584501617 | 8.7962922792  |
| H | 104.1085748342 | 67.5601821606 | 12.6777191068 |
| H | 102.6264705662 | 68.0773910724 | 12.0384989732 |
| H | 103.6948491061 | 69.1366814824 | 12.7784182999 |
| H | 104.3412135144 | 69.6358309763 | 10.5810585357 |

|   |                |               |               |
|---|----------------|---------------|---------------|
| H | 105.4406333461 | 68.3127580487 | 10.9145867330 |
| H | 102.7725727333 | 68.2279090362 | 9.4156522835  |
| H | 104.3822526484 | 67.9403248621 | 8.7686353708  |
| H | 104.4571730922 | 65.8397883558 | 10.3259151438 |
| H | 102.7287530021 | 66.1363345730 | 10.6066729527 |
| H | 102.3857443950 | 66.0842585959 | 8.0707374314  |
| H | 104.0705688670 | 65.5492762810 | 7.9171321122  |
| H | 103.1343620351 | 63.7731825904 | 9.6650655184  |
| H | 101.6932052816 | 64.0724850706 | 8.8151441908  |
| H | 103.1125094545 | 63.5447385091 | 8.0336800583  |
| H | 93.7831019979  | 64.4954966779 | 10.9837242914 |
| H | 95.6198514425  | 57.7972834285 | 5.4686067722  |
| H | 93.3471299910  | 60.0483401670 | 0.1060380321  |
| H | 107.5224149615 | 56.5249254192 | 1.0242611395  |
| H | 101.2459573223 | 57.0861136304 | 2.6864593940  |
| H | 100.9811638330 | 60.1669980841 | 3.4820963884  |
| H | 102.7784670888 | 59.3252521439 | 0.8760995363  |
| H | 104.5972300871 | 63.7161433554 | 5.7487910478  |
| H | 100.5811962989 | 62.5466725569 | 1.4445993832  |
| H | 94.8291928343  | 59.8672869939 | -1.0815080611 |
| C | 95.2420430585  | 60.2379259003 | -2.0081039355 |
| H | 95.8060990000  | 59.4731290000 | -2.5212650000 |
| C | 96.2050580406  | 61.4182501671 | -1.7401009849 |
| C | 97.3758844379  | 60.9561484843 | -0.8980020666 |
| C | 98.3407597715  | 60.0916554073 | -1.4364722872 |
| C | 97.4733427025  | 61.3013620109 | 0.4545541691  |
| C | 99.3487136939  | 59.5545554130 | -0.6377663574 |
| C | 98.4703613777  | 60.7533916394 | 1.2658830434  |
| C | 99.4041164422  | 59.8686143040 | 0.7223146841  |
| H | 94.4099313131  | 60.5447812005 | -2.6554892293 |
| H | 96.5618352327  | 61.8084908236 | -2.7026432947 |
| H | 95.6882572529  | 62.2452223678 | -1.2399368618 |
| H | 96.7668690968  | 62.0155397488 | 0.8714833933  |
| H | 98.2989140130  | 59.8337125468 | -2.4930735465 |
| H | 98.5100738747  | 61.0138867797 | 2.3198411518  |
| H | 100.1672950001 | 59.4215062324 | 1.3520152056  |
| H | 100.0879720492 | 58.8860766476 | -1.0720306597 |
| N | 101.0436712741 | 63.9252219098 | 5.4072187703  |
| N | 101.5094222365 | 64.8854723225 | 5.7992773821  |

TS<sub>N2H</sub>

1. E=7528.292320 solv=-0.125251 disp=-227.74 Z0=915.41

|   |               |               |              |
|---|---------------|---------------|--------------|
| V | 99.4503090000 | 62.6123110000 | 7.2611950000 |
|---|---------------|---------------|--------------|

|    |                |               |               |
|----|----------------|---------------|---------------|
| Fe | 105.5930490000 | 59.5773680000 | 2.1374740000  |
| Fe | 102.9602450000 | 61.8704680000 | 3.2628390000  |
| Fe | 105.1063400000 | 60.9734850000 | 4.6847980000  |
| Fe | 103.1272600000 | 59.0919780000 | 3.9602830000  |
| Fe | 100.1679460000 | 60.0369630000 | 5.7652030000  |
| Fe | 100.4502900000 | 62.3330930000 | 4.2731460000  |
| Fe | 102.6407370000 | 61.3439400000 | 5.7531920000  |
| C  | 101.6833840000 | 60.5703630000 | 4.1574400000  |
| S  | 105.3921500000 | 58.7137840000 | 4.6722270000  |
| S  | 104.6720340000 | 62.5026360000 | 6.6325420000  |
| S  | 105.2336870000 | 61.9269350000 | 2.5723130000  |
| S  | 103.4040650000 | 58.3472880000 | 1.5992220000  |
| S  | 101.7161630000 | 63.8480470000 | 3.0046910000  |
| S  | 98.3855380000  | 61.5383300000 | 5.1777930000  |
| S  | 101.2995930000 | 60.8132660000 | 7.6543580000  |
| C  | 100.7862840000 | 57.5134350000 | 4.4406620000  |
| O  | 102.0233780000 | 57.4153800000 | 4.7102170000  |
| O  | 99.9030830000  | 58.0187870000 | 5.1996190000  |
| O  | 100.3607410000 | 57.0649570000 | 3.2484010000  |
| C  | 97.7015200000  | 66.5490750000 | 5.7020940000  |
| C  | 98.6627950000  | 66.5053540000 | 6.9234610000  |
| C  | 98.3503090000  | 65.4109280000 | 7.9892020000  |
| C  | 97.1559790000  | 65.8537020000 | 8.8626730000  |
| C  | 96.7288940000  | 64.8073130000 | 9.9283550000  |
| C  | 95.2679300000  | 64.4454880000 | 9.8432460000  |
| C  | 99.5955280000  | 65.1503700000 | 8.8687010000  |
| O  | 97.0873500000  | 65.4297250000 | 5.4420620000  |
| O  | 97.6215410000  | 67.5759840000 | 5.0302600000  |
| O  | 94.5995930000  | 64.5893690000 | 11.0048350000 |
| O  | 94.7059150000  | 64.0380890000 | 8.8350650000  |
| O  | 100.0968250000 | 63.9446040000 | 8.7982490000  |
| O  | 100.0582340000 | 66.0585810000 | 9.5611810000  |
| O  | 98.0141130000  | 64.1831520000 | 7.3170980000  |
| H  | 97.6368770000  | 64.5487140000 | 6.4006570000  |
| H  | 99.6638320000  | 66.3283400000 | 6.5137310000  |
| H  | 98.6868500000  | 67.4908880000 | 7.3939170000  |
| H  | 97.4278950000  | 66.7885000000 | 9.3603380000  |
| H  | 96.3214620000  | 66.0670390000 | 8.1858170000  |
| H  | 97.2706630000  | 63.8702140000 | 9.7517310000  |
| H  | 96.9658530000  | 65.1455750000 | 10.9390190000 |
| C  | 106.9407330000 | 57.1709830000 | 0.3605370000  |
| H  | 107.2292220000 | 56.9628310000 | -0.6746000000 |
| H  | 105.8781050000 | 56.9431360000 | 0.4791690000  |
| S  | 107.2858090000 | 58.9484540000 | 0.7234920000  |

|   |                |               |               |
|---|----------------|---------------|---------------|
| C | 93.8381050000  | 61.0220350000 | 1.8636440000  |
| C | 93.6249890000  | 61.1905150000 | 3.3701630000  |
| C | 94.6033190000  | 62.2456760000 | 3.9098030000  |
| C | 94.3995320000  | 62.5684320000 | 5.3866440000  |
| N | 95.5774450000  | 63.3134670000 | 5.9292390000  |
| C | 93.0790260000  | 59.8959600000 | 1.1410740000  |
| H | 94.9112750000  | 60.8751330000 | 1.6811000000  |
| H | 93.5887800000  | 61.9752080000 | 1.3769010000  |
| H | 93.7946420000  | 60.2359600000 | 3.8899250000  |
| H | 92.5840250000  | 61.4823840000 | 3.5768570000  |
| H | 95.6281010000  | 61.8794160000 | 3.7673420000  |
| H | 94.5207620000  | 63.1682200000 | 3.3196810000  |
| H | 94.3073280000  | 61.6532220000 | 5.9810770000  |
| H | 93.5083220000  | 63.1768390000 | 5.5669490000  |
| H | 95.4948430000  | 63.5060760000 | 6.9416970000  |
| H | 96.4550350000  | 62.7659670000 | 5.7628760000  |
| H | 95.7733870000  | 64.2331370000 | 5.4742660000  |
| H | 91.9910360000  | 59.9721800000 | 1.2533260000  |
| H | 93.4049000000  | 58.9145810000 | 1.4526840000  |
| C | 100.0989990000 | 60.0520000000 | 10.8889970000 |
| C | 99.2291160000  | 61.3134640000 | 10.6661840000 |
| C | 98.0202490000  | 61.0694470000 | 9.8279900000  |
| N | 97.9841170000  | 61.3656480000 | 8.4770930000  |
| C | 96.8440340000  | 60.4550580000 | 10.1878610000 |
| C | 96.8263520000  | 60.9104810000 | 8.0260780000  |
| N | 96.0981190000  | 60.3629540000 | 9.0293670000  |
| H | 100.7720110000 | 59.8784110000 | 10.1700240000 |
| H | 99.4636510000  | 59.1660190000 | 11.0172430000 |
| H | 100.5712430000 | 60.2159540000 | 11.7550860000 |
| H | 98.9042370000  | 61.6770820000 | 11.6504260000 |
| H | 99.8231720000  | 62.1082490000 | 10.2084360000 |
| H | 96.4912720000  | 60.0712880000 | 11.1330630000 |
| H | 95.2033390000  | 59.9079800000 | 8.9248530000  |
| H | 96.5300090000  | 60.9003450000 | 6.9897540000  |
| C | 101.6500020000 | 56.1420050000 | 7.7050010000  |
| N | 102.7888120000 | 57.0001360000 | 7.3849080000  |
| C | 103.3420000000 | 57.8845540000 | 8.2023460000  |
| N | 102.8696610000 | 58.0147880000 | 9.4774590000  |
| N | 104.4364140000 | 58.5662200000 | 7.8332780000  |
| H | 101.7280170000 | 55.2581320000 | 7.0646310000  |
| H | 100.7886340000 | 56.5995590000 | 7.4843450000  |
| H | 101.6262280000 | 55.8261440000 | 8.6535100000  |
| H | 102.8836320000 | 57.1601490000 | 6.3760210000  |
| H | 103.3126460000 | 58.7370000000 | 10.0303750000 |

|   |                |               |               |
|---|----------------|---------------|---------------|
| H | 101.8596740000 | 58.0313060000 | 9.5604230000  |
| H | 104.7925270000 | 58.4679140000 | 6.8669180000  |
| H | 104.5449520000 | 59.5023860000 | 8.2043450000  |
| C | 104.8710010000 | 65.5940000000 | -4.0429940000 |
| C | 104.4936590000 | 64.1338870000 | -3.7134990000 |
| C | 103.9936080000 | 63.9915130000 | -2.3076200000 |
| N | 102.8845500000 | 64.6816290000 | -1.8531470000 |
| C | 104.5645670000 | 63.2828280000 | -1.2750740000 |
| C | 102.7935190000 | 64.3864470000 | -0.5694190000 |
| N | 103.7834180000 | 63.5427480000 | -0.1716260000 |
| H | 105.4142230000 | 65.9758310000 | -3.2952590000 |
| H | 103.9624850000 | 66.1984650000 | -4.1349740000 |
| H | 105.3923870000 | 65.6470930000 | -4.8946700000 |
| H | 105.3715380000 | 63.4861580000 | -3.8396170000 |
| H | 103.7396130000 | 63.7809660000 | -4.4312520000 |
| H | 105.4270770000 | 62.6347050000 | -1.2204590000 |
| H | 103.9478410000 | 63.1919420000 | 0.7654090000  |
| H | 102.0429530000 | 64.7416220000 | 0.1216680000  |
| C | 95.6299760000  | 57.4820330000 | 6.4910620000  |
| C | 97.0498010000  | 57.3524590000 | 7.0629720000  |
| O | 97.8384950000  | 56.4764350000 | 6.2698780000  |
| C | 97.0236580000  | 56.7901830000 | 8.4871920000  |
| H | 95.0297450000  | 58.1941860000 | 7.0769740000  |
| H | 98.0364440000  | 56.7607030000 | 8.9032820000  |
| H | 96.6316260000  | 55.7661120000 | 8.4744470000  |
| H | 96.3947350000  | 57.3931570000 | 9.1535740000  |
| H | 95.1228840000  | 56.5095970000 | 6.5391280000  |
| H | 98.4187360000  | 57.0233880000 | 5.7039950000  |
| H | 97.5149750000  | 58.3489530000 | 7.0844560000  |
| C | 98.4860000000  | 66.3580010000 | -1.7130010000 |
| C | 98.8554310000  | 65.6331140000 | -0.4014020000 |
| C | 98.3514790000  | 66.2627120000 | 0.9034550000  |
| C | 96.8802900000  | 66.0015870000 | 1.2268010000  |
| O | 96.1576880000  | 65.2627010000 | 0.5563550000  |
| N | 96.4012600000  | 66.6706230000 | 2.3223690000  |
| H | 98.7144620000  | 67.3289720000 | -1.6420950000 |
| H | 97.4186800000  | 66.2533110000 | -1.9330790000 |
| H | 99.0290070000  | 65.9401260000 | -2.4413700000 |
| H | 98.5102960000  | 64.5969260000 | -0.4525210000 |
| H | 99.9484480000  | 65.5854620000 | -0.3530680000 |
| H | 98.9396530000  | 65.8663920000 | 1.7442650000  |
| H | 98.5218620000  | 67.3488390000 | 0.9111590000  |
| H | 97.0069250000  | 66.9963020000 | 3.0773040000  |
| H | 95.4871650000  | 66.3640890000 | 2.6295730000  |

|   |                |               |               |
|---|----------------|---------------|---------------|
| C | 103.6859930000 | 68.3259930000 | 12.1929980000 |
| C | 104.3680450000 | 68.5637370000 | 10.8285610000 |
| C | 103.7470710000 | 67.7787380000 | 9.6564530000  |
| C | 103.5320190000 | 66.2758190000 | 9.9117220000  |
| C | 103.2447740000 | 65.5366020000 | 8.6066630000  |
| N | 102.7889380000 | 64.1208360000 | 8.8490040000  |
| H | 104.1085750000 | 67.5601820000 | 12.6777190000 |
| H | 102.6257530000 | 68.0768200000 | 12.0433280000 |
| H | 103.6948490000 | 69.1366810000 | 12.7784180000 |
| H | 104.3289420000 | 69.6295030000 | 10.5706350000 |
| H | 105.4353930000 | 68.3134760000 | 10.9081400000 |
| H | 102.7719270000 | 68.2154850000 | 9.4032700000  |
| H | 104.3850030000 | 67.9123000000 | 8.7713310000  |
| H | 104.4226650000 | 65.8369560000 | 10.3879870000 |
| H | 102.6820090000 | 66.1385800000 | 10.5898130000 |
| H | 102.4483380000 | 66.0147450000 | 8.0354060000  |
| H | 104.1381100000 | 65.4814070000 | 7.9784710000  |
| H | 103.2259820000 | 63.7320600000 | 9.6879140000  |
| H | 101.7260010000 | 64.0493580000 | 8.9462140000  |
| H | 103.0787700000 | 63.5031950000 | 8.0657320000  |
| H | 93.6778810000  | 64.3197070000 | 10.8258000000 |
| H | 95.6198510000  | 57.7972830000 | 5.4686070000  |
| H | 93.3471300000  | 60.0483400000 | 0.1060380000  |
| H | 107.5224150000 | 56.5249260000 | 1.0242610000  |
| H | 101.1597360000 | 56.8605150000 | 2.7190860000  |
| H | 101.0865020000 | 60.1175490000 | 3.3409080000  |
| H | 102.8442700000 | 59.3482420000 | 0.8855730000  |
| H | 104.7296220000 | 63.5556610000 | 5.7861730000  |
| H | 101.7528550000 | 64.7205560000 | 4.6784300000  |
| H | 94.8291930000  | 59.8672870000 | -1.0815080000 |
| C | 95.2420430000  | 60.2379260000 | -2.0081040000 |
| H | 95.8060990000  | 59.4731290000 | -2.5212650000 |
| C | 96.1269080000  | 61.4748290000 | -1.7762620000 |
| C | 97.3810270000  | 61.1958520000 | -0.9697690000 |
| C | 98.2664850000  | 60.1700580000 | -1.3342610000 |
| C | 97.7024830000  | 61.9928960000 | 0.1367730000  |
| C | 99.4430010000  | 59.9492130000 | -0.6187440000 |
| C | 98.8851520000  | 61.7813110000 | 0.8504650000  |
| C | 99.7574830000  | 60.7593550000 | 0.4748830000  |
| H | 94.3945580000  | 60.4991320000 | -2.6571110000 |
| H | 96.4130740000  | 61.8869140000 | -2.7551970000 |
| H | 95.5490580000  | 62.2624720000 | -1.2787160000 |
| H | 97.0428860000  | 62.8118410000 | 0.4155450000  |
| H | 98.0461070000  | 59.5451960000 | -2.1971770000 |



|   |                |               |               |
|---|----------------|---------------|---------------|
| H | 99.1348900000  | 62.4285200000 | 1.6867640000  |
| H | 100.6841100000 | 60.6063290000 | 1.0204650000  |
| H | 100.1215240000 | 59.1553020000 | -0.9210730000 |
| N | 100.6892990000 | 63.6980370000 | 5.8869370000  |
| N | 101.3611100000 | 64.6840510000 | 5.7774800000  |

E<sub>N2H</sub>

E=-7528.305621 solv=-0.122304 disp=-234.94 Z0=918.93

|    |                |               |               |
|----|----------------|---------------|---------------|
| V  | 99.5147492095  | 62.5258773137 | 7.3374936423  |
| Fe | 105.5897088850 | 59.9011703033 | 2.1213612531  |
| Fe | 102.7351574171 | 62.1138903179 | 3.0480621432  |
| Fe | 105.1772240165 | 61.4284204514 | 4.6340541673  |
| Fe | 103.1736033920 | 59.4460915524 | 4.0017104019  |
| Fe | 100.2289652199 | 60.0921699625 | 5.8611411165  |
| Fe | 100.3048607691 | 62.5467472868 | 4.2757527598  |
| Fe | 102.4845635041 | 61.7115367236 | 5.7412954302  |
| C  | 101.6812123861 | 60.7750130574 | 4.1695509395  |
| S  | 105.4687493133 | 59.2075644537 | 4.6643588727  |
| S  | 104.6420873710 | 62.8411975131 | 6.5410494171  |
| S  | 105.0198062200 | 62.2348762441 | 2.4591900977  |
| S  | 103.4042505532 | 58.6552833308 | 1.6449651498  |
| S  | 101.3906178133 | 63.8899132409 | 2.7554561119  |
| S  | 98.3834936485  | 61.4606904991 | 5.2565935535  |
| S  | 101.4401667601 | 60.8278937510 | 7.7174769492  |
| C  | 101.0013690213 | 57.6573599694 | 4.5025738351  |
| O  | 102.2546577292 | 57.6576159146 | 4.7439920495  |
| O  | 100.1033447766 | 58.0414227524 | 5.3115544821  |
| O  | 100.5944142528 | 57.2348008339 | 3.2971432716  |
| C  | 97.7425444553  | 66.3880304160 | 5.6442103995  |
| C  | 98.7008175699  | 66.3816585129 | 6.8688711198  |
| C  | 98.3734945844  | 65.3277239098 | 7.9700570530  |
| C  | 97.1526089713  | 65.7885322229 | 8.7944674390  |
| C  | 96.7331360844  | 64.7802278126 | 9.8981800241  |
| C  | 95.2679301925  | 64.4454877187 | 9.8432464811  |
| C  | 99.5896939674  | 65.1008269448 | 8.8996156023  |
| O  | 97.1723386957  | 65.2440335656 | 5.3873265902  |
| O  | 97.6203183609  | 67.4104508745 | 4.9675984674  |
| O  | 94.6029910648  | 64.6987694681 | 10.9883342930 |
| O  | 94.6924143725  | 63.9748549588 | 8.8690484368  |
| O  | 100.0822629862 | 63.8886182079 | 8.8983774062  |
| O  | 100.0246943265 | 66.0324194654 | 9.5808311669  |
| O  | 98.0577862435  | 64.0707108262 | 7.3428956283  |
| H  | 97.7143936155  | 64.3886428080 | 6.4054424993  |

|   |                |               |               |
|---|----------------|---------------|---------------|
| H | 99.7032708303  | 66.1717195415 | 6.4782506697  |
| H | 98.7308697583  | 67.3822591977 | 7.3058040670  |
| H | 97.3866035660  | 66.7539174110 | 9.2512164690  |
| H | 96.3283093574  | 65.9435873330 | 8.0897649115  |
| H | 97.2563746949  | 63.8309284806 | 9.7354768020  |
| H | 96.9960108945  | 65.1442241193 | 10.8930630050 |
| C | 106.8229734196 | 57.2467931048 | 0.5838452436  |
| H | 106.8107135617 | 57.1039843553 | -0.5009115371 |
| H | 105.8196480515 | 57.0489978484 | 0.9682017893  |
| S | 107.3488265476 | 58.9840489339 | 0.9512052914  |
| C | 93.8407603231  | 61.0133966085 | 1.8742938617  |
| C | 93.6386253409  | 61.1499540071 | 3.3857779553  |
| C | 94.6417808971  | 62.1675181032 | 3.9510190333  |
| C | 94.4205623806  | 62.4843082263 | 5.4265712751  |
| N | 95.5972996244  | 63.2108652755 | 5.9943307862  |
| C | 93.0790262941  | 59.8959600187 | 1.1410742676  |
| H | 94.9122828211  | 60.8701394095 | 1.6807964548  |
| H | 93.5883433960  | 61.9757979058 | 1.4075498481  |
| H | 93.7875159901  | 60.1791142110 | 3.8813554132  |
| H | 92.6049669427  | 61.4591843467 | 3.6049706121  |
| H | 95.6569212527  | 61.7704393154 | 3.8239725774  |
| H | 94.5990411449  | 63.0977389456 | 3.3686755528  |
| H | 94.3042522057  | 61.5662434724 | 6.0129369193  |
| H | 93.5340632826  | 63.1030139848 | 5.5955574141  |
| H | 95.4877890636  | 63.4203298386 | 7.0009124876  |
| H | 96.4683212904  | 62.6424096995 | 5.8621751904  |
| H | 95.8325990522  | 64.1178885744 | 5.5259622497  |
| H | 91.9911589331  | 59.9724067957 | 1.2536883437  |
| H | 93.4048998884  | 58.9145809226 | 1.4526838730  |
| C | 100.0989993771 | 60.0520004768 | 10.8889969506 |
| C | 99.2122010080  | 61.3099205361 | 10.7356300235 |
| C | 97.9858472345  | 61.0850842125 | 9.9242132396  |
| N | 97.9703688376  | 61.2951769609 | 8.5590866083  |
| C | 96.7804125396  | 60.5566168474 | 10.3188487115 |
| C | 96.7919784882  | 60.8748556606 | 8.1325452661  |
| N | 96.0324359851  | 60.4285747017 | 9.1633564104  |
| H | 100.7720112726 | 59.8784110979 | 10.1700240828 |
| H | 99.4688131568  | 59.1615321868 | 11.0181749486 |
| H | 100.5712426012 | 60.2159540415 | 11.7550862100 |
| H | 98.9055776028  | 61.6197727646 | 11.7439590210 |
| H | 99.7853335711  | 62.1366326487 | 10.3094736592 |
| H | 96.4063646170  | 60.2543263500 | 11.2849262389 |
| H | 95.1076712785  | 60.0318578701 | 9.0855168324  |
| H | 96.4937636805  | 60.8279052214 | 7.0977542058  |

|   |                |               |               |
|---|----------------|---------------|---------------|
| C | 101.6500023977 | 56.1420047945 | 7.7050009415  |
| N | 102.7695828958 | 57.0355846375 | 7.3931431694  |
| C | 103.3113968605 | 57.9122530886 | 8.2232839143  |
| N | 102.8965002583 | 57.9753152994 | 9.5221674264  |
| N | 104.3596095277 | 58.6652199130 | 7.8411211277  |
| H | 101.7473701179 | 55.2632551562 | 7.0605053352  |
| H | 100.7886343214 | 56.5995589083 | 7.4843453856  |
| H | 101.6262278750 | 55.8261443686 | 8.6535097869  |
| H | 102.8205944596 | 57.2672603975 | 6.3867602884  |
| H | 103.3260086234 | 58.7048594319 | 10.0763877898 |
| H | 101.8939080633 | 57.9259697776 | 9.6591682327  |
| H | 104.6848918650 | 58.6177086862 | 6.8663589199  |
| H | 104.3872091173 | 59.6089954688 | 8.2103626687  |
| C | 104.8710003620 | 65.5940000469 | -4.0429939116 |
| C | 104.5575766920 | 64.1093842867 | -3.7490345080 |
| C | 103.8151241024 | 63.9030067269 | -2.4655542348 |
| N | 102.4371021229 | 63.9996630360 | -2.4081354661 |
| C | 104.3263246212 | 63.6691168921 | -1.2087308527 |
| C | 102.1284155619 | 63.8230071490 | -1.1371365067 |
| N | 103.2346496023 | 63.6268086572 | -0.3704601689 |
| H | 105.4142236001 | 65.9758310152 | -3.2952589541 |
| H | 103.9432814473 | 66.1689163655 | -4.1396798024 |
| H | 105.3923872468 | 65.6470933527 | -4.8946699509 |
| H | 105.5028289633 | 63.5499013809 | -3.7200950099 |
| H | 103.9656734480 | 63.6900071789 | -4.5719388518 |
| H | 105.3304304165 | 63.5230506846 | -0.8400102480 |
| H | 103.2449151482 | 63.4894279538 | 0.6328788412  |
| H | 101.1359747556 | 63.8221975307 | -0.7112623345 |
| C | 95.6299754772  | 57.4820327598 | 6.4910616537  |
| C | 97.0757456475  | 57.4218784913 | 7.0088219506  |
| O | 97.8490827846  | 56.5522385062 | 6.1876511210  |
| C | 97.1459271239  | 56.9119415000 | 8.4500812545  |
| H | 95.0192034158  | 58.1764927443 | 7.0858716684  |
| H | 98.1803281947  | 56.9314243475 | 8.8104026220  |
| H | 96.7888733679  | 55.8761284625 | 8.4979487323  |
| H | 96.5355034678  | 57.5217415349 | 9.1273709311  |
| H | 95.1666125442  | 56.4894427802 | 6.5459904714  |
| H | 98.5090987139  | 57.0841490205 | 5.7017141453  |
| H | 97.5013905657  | 58.4342288166 | 6.9715158766  |
| C | 98.4859997431  | 66.3580012126 | -1.7130009189 |
| C | 98.8219978713  | 65.6336909451 | -0.3914540282 |
| C | 98.2421934359  | 66.2344121569 | 0.8962988625  |
| C | 96.8032072617  | 65.8348325792 | 1.2250831845  |
| O | 96.1376663032  | 65.0447041966 | 0.5522347830  |

|   |                |               |               |
|---|----------------|---------------|---------------|
| N | 96.2869745756  | 66.4418227416 | 2.3389431573  |
| H | 98.7144619756  | 67.3289719317 | -1.6420949874 |
| H | 97.4192540465  | 66.2608669805 | -1.9490146507 |
| H | 99.0290071122  | 65.9401255822 | -2.4413702500 |
| H | 98.5119332979  | 64.5853477726 | -0.4577213446 |
| H | 99.9124588676  | 65.6264644006 | -0.2817396881 |
| H | 98.8602847141  | 65.9142436444 | 1.7473422449  |
| H | 98.3041541259  | 67.3321170818 | 0.8849600743  |
| H | 96.8755398051  | 66.8283042675 | 3.0806142249  |
| H | 95.4061677280  | 66.0584162804 | 2.6564255450  |
| C | 103.6859932846 | 68.3259926594 | 12.1929979684 |
| C | 104.3668911817 | 68.5609801453 | 10.8300180459 |
| C | 103.7456357238 | 67.7509009033 | 9.6779046052  |
| C | 103.5047507969 | 66.2625587925 | 9.9865750981  |
| C | 103.2173565395 | 65.4974458380 | 8.7012928056  |
| N | 102.7474926444 | 64.0925379102 | 8.9618455589  |
| H | 104.1085748704 | 67.5601821766 | 12.6777191008 |
| H | 102.6258402609 | 68.0784246733 | 12.0429981818 |
| H | 103.6948491572 | 69.1366814761 | 12.7784183077 |
| H | 104.3181638987 | 69.6235160149 | 10.5606404153 |
| H | 105.4363671957 | 68.3207496140 | 10.9120032704 |
| H | 102.7792427512 | 68.1929418984 | 9.4018613178  |
| H | 104.3909051007 | 67.8425706996 | 8.7926924387  |
| H | 104.3841771646 | 65.8268950473 | 10.4867016242 |
| H | 102.6472536372 | 66.1602651325 | 10.6610412848 |
| H | 102.4267358518 | 65.9622252586 | 8.1125252195  |
| H | 104.1144205347 | 65.4213537041 | 8.0809363755  |
| H | 103.2080993250 | 63.6868854932 | 9.7796565766  |
| H | 101.6840273752 | 64.0330919899 | 9.0809565076  |
| H | 102.9833577430 | 63.4869063475 | 8.1577711523  |
| H | 93.6736355810  | 64.4446704639 | 10.8269310438 |
| H | 95.6198513399  | 57.7972834118 | 5.4686067681  |
| H | 93.3471300869  | 60.0483403344 | 0.1060381397  |
| H | 107.5224148618 | 56.5249256490 | 1.0242611146  |
| H | 101.3953394887 | 57.1439177937 | 2.7370851303  |
| H | 101.0187887876 | 60.2812686960 | 3.4356321470  |
| H | 102.8177079103 | 59.6138571883 | 0.8957381072  |
| H | 104.5907755503 | 63.9741701777 | 5.8062448289  |
| H | 101.9267164580 | 64.7536872093 | 5.2476138077  |
| H | 94.8291928253  | 59.8672866845 | -1.0815081853 |
| C | 95.2420430315  | 60.2379260174 | -2.0081039640 |
| H | 95.8060990000  | 59.4731290000 | -2.5212650000 |
| C | 96.1618004310  | 61.4485494552 | -1.7591876879 |
| C | 97.3478947802  | 61.0862229812 | -0.8893077282 |

|   |                |               |               |
|---|----------------|---------------|---------------|
| C | 98.2501793161  | 60.0870739474 | -1.2879103500 |
| C | 97.5491423744  | 61.7179998654 | 0.3449289831  |
| C | 99.3153983089  | 59.7144164096 | -0.4691816152 |
| C | 98.6131901565  | 61.3434876649 | 1.1697240296  |
| C | 99.4942212757  | 60.3381666739 | 0.7681904183  |
| H | 94.4018746871  | 60.5189921554 | -2.6578390869 |
| H | 96.5118693735  | 61.8305793918 | -2.7287816765 |
| H | 95.6046516400  | 62.2681363843 | -1.2913193572 |
| H | 96.8890385849  | 62.5289778393 | 0.6439136457  |
| H | 98.1231308271  | 59.5988420118 | -2.2521894669 |
| H | 98.7533681451  | 61.8452658597 | 2.1218013460  |
| H | 100.3202039223 | 60.0438322472 | 1.4072058231  |
| H | 100.0074967226 | 58.9419923319 | -0.7948784986 |
| N | 100.7910275996 | 63.4868561667 | 6.0328357551  |
| N | 101.4258733369 | 64.5658188014 | 6.1470691981  |

TS'<sub>N2H</sub>

E=-7681.175144 solv=-0.120483 disp=-240.97 Z0=949.25

|    |                |               |              |
|----|----------------|---------------|--------------|
| V  | 99.3279280000  | 62.2496950000 | 7.0983810000 |
| Fe | 105.1774680000 | 59.4747600000 | 2.5184410000 |
| Fe | 102.4276400000 | 61.7253890000 | 2.9144270000 |
| Fe | 104.9043520000 | 61.3005790000 | 5.0942450000 |
| Fe | 102.4099780000 | 58.7662600000 | 3.3059760000 |
| Fe | 99.6731590000  | 59.6670540000 | 5.3969330000 |
| Fe | 99.9967230000  | 62.1498270000 | 4.1157310000 |
| Fe | 102.2554750000 | 60.4286130000 | 5.4342350000 |
| C  | 101.1836390000 | 60.3363800000 | 3.7896880000 |
| S  | 104.2689640000 | 59.0498120000 | 5.0384370000 |
| S  | 105.1653350000 | 62.1610320000 | 7.3009050000 |
| S  | 104.8272020000 | 61.9075900000 | 2.8815020000 |
| S  | 103.3552270000 | 58.5790270000 | 1.2045630000 |
| S  | 101.0867650000 | 63.5248520000 | 2.5420180000 |
| S  | 97.9454810000  | 61.2601130000 | 5.0760000000 |
| S  | 100.9317590000 | 60.2022260000 | 7.3175340000 |
| C  | 100.2224010000 | 56.9147260000 | 4.1687880000 |
| O  | 101.4726580000 | 57.0430100000 | 4.0993450000 |
| O  | 99.3630680000  | 57.7477200000 | 4.5825410000 |
| O  | 99.6926270000  | 55.7355680000 | 3.7450660000 |
| C  | 97.6313660000  | 66.2328720000 | 5.5318690000 |
| C  | 98.6756180000  | 66.1376040000 | 6.6824010000 |
| C  | 98.3526280000  | 65.0958810000 | 7.7908060000 |
| C  | 97.1975030000  | 65.6130330000 | 8.6760400000 |
| C  | 96.7627140000  | 64.6043350000 | 9.7752060000 |

|   |                |               |               |
|---|----------------|---------------|---------------|
| C | 95.2679305300  | 64.4454877512 | 9.8432462888  |
| C | 99.6004570000  | 64.7797720000 | 8.6522780000  |
| O | 96.9340860000  | 65.1547440000 | 5.3205240000  |
| O | 97.5661140000  | 67.2653530000 | 4.8623170000  |
| O | 94.7201750000  | 64.8275650000 | 11.0125970000 |
| O | 94.5714680000  | 64.0091980000 | 8.9338020000  |
| O | 100.0319520000 | 63.5632570000 | 8.6144680000  |
| O | 100.1206470000 | 65.6961950000 | 9.3086880000  |
| O | 97.9437130000  | 63.8672940000 | 7.1610950000  |
| H | 97.5522450000  | 64.2114530000 | 6.2642420000  |
| H | 99.6262350000  | 65.8634010000 | 6.2105410000  |
| H | 98.8129510000  | 67.1273760000 | 7.1239680000  |
| H | 97.5105220000  | 66.5519330000 | 9.1406330000  |
| H | 96.3551180000  | 65.8322120000 | 8.0105650000  |
| H | 97.1536090000  | 63.6138510000 | 9.5187550000  |
| H | 97.1575690000  | 64.8881530000 | 10.7525580000 |
| C | 106.9440580000 | 56.8705600000 | 1.8895720000  |
| H | 105.8830650000 | 56.7177500000 | 1.6736740000  |
| H | 107.2244820000 | 56.2742310000 | 2.7634930000  |
| S | 107.3118960000 | 58.6597380000 | 2.1994390000  |
| C | 93.7737680000  | 61.0281630000 | 1.9080000000  |
| C | 93.4442580000  | 61.1887530000 | 3.3946010000  |
| C | 94.3651080000  | 62.2547190000 | 4.0053620000  |
| C | 94.1176880000  | 62.5175750000 | 5.4886630000  |
| N | 95.3090710000  | 63.1888960000 | 6.0948440000  |
| C | 93.0790263440  | 59.8959599675 | 1.1410743026  |
| H | 94.8561640000  | 60.8839380000 | 1.8142540000  |
| H | 93.5569560000  | 61.9795040000 | 1.4026460000  |
| H | 93.5942070000  | 60.2342220000 | 3.9203530000  |
| H | 92.3854850000  | 61.4595730000 | 3.5249430000  |
| H | 95.4041630000  | 61.9230440000 | 3.8850240000  |
| H | 94.2740590000  | 63.1959330000 | 3.4472160000  |
| H | 93.9748780000  | 61.5801650000 | 6.0368470000  |
| H | 93.2447280000  | 63.1516580000 | 5.6698540000  |
| H | 95.1893790000  | 63.3938510000 | 7.1021000000  |
| H | 96.1466910000  | 62.5788100000 | 5.9673240000  |
| H | 95.5935570000  | 64.0866720000 | 5.6327010000  |
| H | 91.9858810000  | 59.9452080000 | 1.2275170000  |
| H | 93.4048998595  | 58.9145809020 | 1.4526838385  |
| C | 100.0989993984 | 60.0520006607 | 10.8889965889 |
| C | 99.1775180000  | 61.2741580000 | 10.6676470000 |
| C | 97.9448230000  | 60.9760760000 | 9.8775860000  |
| N | 97.8709120000  | 61.1431680000 | 8.5053370000  |
| C | 96.7601910000  | 60.4427740000 | 10.3293000000 |

|   |                |               |               |
|---|----------------|---------------|---------------|
| C | 96.6837090000  | 60.6960060000 | 8.1352930000  |
| N | 95.9699530000  | 60.2712950000 | 9.2084550000  |
| H | 100.7720113718 | 59.8784108908 | 10.1700241524 |
| H | 99.4911590000  | 59.1456110000 | 11.0208990000 |
| H | 100.5712425155 | 60.2159540500 | 11.7550862552 |
| H | 98.8623570000  | 61.6324550000 | 11.6572220000 |
| H | 99.7280900000  | 62.0894170000 | 10.1931380000 |
| H | 96.4244980000  | 60.1700450000 | 11.3184230000 |
| H | 95.0515940000  | 59.8544420000 | 9.1773370000  |
| H | 96.3507210000  | 60.6224980000 | 7.1111280000  |
| C | 101.6500022208 | 56.1420045954 | 7.7050008057  |
| N | 102.7872710000 | 57.0445700000 | 7.5019700000  |
| C | 103.2577740000 | 57.8716610000 | 8.4284300000  |
| N | 102.6743760000 | 57.8995950000 | 9.6626720000  |
| N | 104.3770890000 | 58.5774420000 | 8.2057120000  |
| H | 101.7798780000 | 55.2821250000 | 7.0435430000  |
| H | 100.7886343144 | 56.5995589134 | 7.4843454240  |
| H | 101.6262279910 | 55.8261444821 | 8.6535098276  |
| H | 103.0468400000 | 57.2653780000 | 6.5386380000  |
| H | 103.0752230000 | 58.5648060000 | 10.3117670000 |
| H | 101.6605050000 | 57.9296350000 | 9.6569680000  |
| H | 104.6930800000 | 58.6138500000 | 7.2253240000  |
| H | 104.4592420000 | 59.4865080000 | 8.6521680000  |
| C | 104.8709998840 | 65.5939999305 | -4.0429935375 |
| C | 104.5265320000 | 64.1273470000 | -3.6944960000 |
| C | 104.2654370000 | 63.9639600000 | -2.2274710000 |
| N | 103.2748470000 | 64.6885600000 | -1.5872660000 |
| C | 104.9491200000 | 63.1939080000 | -1.3169430000 |
| C | 103.3540350000 | 64.3565830000 | -0.3161530000 |
| N | 104.3389720000 | 63.4303660000 | -0.0934660000 |
| H | 105.4142237616 | 65.9758309691 | -3.2952590478 |
| H | 103.9583810000 | 66.1927320000 | -4.1332970000 |
| H | 105.3923874478 | 65.6470931655 | -4.8946698395 |
| H | 105.3584910000 | 63.4701400000 | -3.9792930000 |
| H | 103.6557460000 | 63.7981060000 | -4.2768460000 |
| H | 105.7823790000 | 62.5133820000 | -1.4160900000 |
| H | 104.6678250000 | 63.1262730000 | 0.8252280000  |
| H | 102.7117700000 | 64.7041480000 | 0.4817120000  |
| C | 95.6299758156  | 57.4820327217 | 6.4910614805  |
| C | 97.0412600000  | 57.2491750000 | 7.0462700000  |
| O | 97.7239850000  | 56.2664270000 | 6.2834720000  |
| C | 96.9974220000  | 56.7504820000 | 8.4911540000  |
| H | 95.0919510000  | 58.2385270000 | 7.0813330000  |
| H | 98.0136610000  | 56.6053220000 | 8.8724490000  |

|   |                |               |               |
|---|----------------|---------------|---------------|
| H | 96.4753700000  | 55.7868910000 | 8.5397060000  |
| H | 96.4820050000  | 57.4612820000 | 9.1469530000  |
| H | 95.0565200000  | 56.5480470000 | 6.5546860000  |
| H | 98.1212320000  | 56.7211960000 | 5.5126160000  |
| H | 97.5967770000  | 58.2006780000 | 7.0201240000  |
| C | 98.4859996954  | 66.3580011720 | -1.7130008681 |
| C | 98.8604660000  | 65.6249530000 | -0.4061910000 |
| C | 98.2577000000  | 66.1750390000 | 0.8906410000  |
| C | 96.7994750000  | 65.7869570000 | 1.1366760000  |
| O | 96.1770690000  | 65.0032010000 | 0.4199300000  |
| N | 96.2213260000  | 66.3948200000 | 2.2207940000  |
| H | 98.7144619838  | 67.3289719280 | -1.6420949642 |
| H | 97.4177920000  | 66.2496910000 | -1.9332160000 |
| H | 99.0290071179  | 65.9401256241 | -2.4413702696 |
| H | 98.5916050000  | 64.5670660000 | -0.4939260000 |
| H | 99.9525250000  | 65.6540860000 | -0.3044700000 |
| H | 98.8366880000  | 65.7900850000 | 1.7424750000  |
| H | 98.3456990000  | 67.2698350000 | 0.9395770000  |
| H | 96.7784350000  | 66.7607850000 | 2.9971060000  |
| H | 95.3329190000  | 65.9963930000 | 2.4964140000  |
| C | 103.6859929457 | 68.3259922798 | 12.1929976605 |
| C | 104.4212590000 | 68.6073390000 | 10.8583410000 |
| C | 103.7808040000 | 67.9872160000 | 9.6052310000  |
| C | 103.6292650000 | 66.4562040000 | 9.6033730000  |
| C | 103.0786960000 | 65.9949910000 | 8.2532910000  |
| N | 102.7171260000 | 64.5514400000 | 8.1892210000  |
| H | 104.1085749531 | 67.5601823161 | 12.6777192494 |
| H | 102.6332810000 | 68.0739130000 | 12.0079720000 |
| H | 103.6948493524 | 69.1366815119 | 12.7784182550 |
| H | 104.4718290000 | 69.6914950000 | 10.6928640000 |
| H | 105.4646000000 | 68.2704160000 | 10.9373250000 |
| H | 102.7844550000 | 68.4288650000 | 9.4613450000  |
| H | 104.3763460000 | 68.2857640000 | 8.7301860000  |
| H | 104.5969590000 | 65.9739250000 | 9.8039280000  |
| H | 102.9328570000 | 66.1470690000 | 10.3925060000 |
| H | 102.1585120000 | 66.5363590000 | 8.0242690000  |
| H | 103.8006370000 | 66.1772150000 | 7.4503100000  |
| H | 103.5282720000 | 63.9168070000 | 8.2385090000  |
| H | 102.0024880000 | 64.2999460000 | 8.8891190000  |
| H | 102.2131670000 | 64.3558570000 | 7.2316300000  |
| H | 93.7577550000  | 64.6852340000 | 10.9241150000 |
| H | 95.6198510338  | 57.7972834878 | 5.4686067945  |
| H | 93.3471303815  | 60.0483408515 | 0.1060384547  |
| H | 107.5224142860 | 56.5249263609 | 1.0242612966  |



|   |                |               |               |
|---|----------------|---------------|---------------|
| H | 100.4420120000 | 55.2120880000 | 3.4127870000  |
| H | 100.5125400000 | 59.9442190000 | 3.0015460000  |
| H | 100.6406720000 | 62.6258840000 | 0.6365390000  |
| H | 106.3937860000 | 62.7047000000 | 7.1328700000  |
| H | 101.8100510000 | 64.2912220000 | 4.9057910000  |
| H | 94.8291925537  | 59.8672856113 | -1.0815087241 |
| C | 95.2420434368  | 60.2379265145 | -2.0081035143 |
| H | 95.8060990000  | 59.4731290000 | -2.5212650000 |
| C | 96.3044530000  | 61.3086090000 | -1.6329710000 |
| C | 97.4129410000  | 60.5977230000 | -0.8797490000 |
| C | 98.3260810000  | 59.7873130000 | -1.5762640000 |
| C | 97.4731950000  | 60.6007950000 | 0.5207260000  |
| C | 99.2403200000  | 58.9787830000 | -0.8992830000 |
| C | 98.3693160000  | 59.7725850000 | 1.2072990000  |
| C | 99.2520810000  | 58.9530380000 | 0.4985710000  |
| H | 94.4411220000  | 60.6309900000 | -2.6435160000 |
| H | 96.7095710000  | 61.7732260000 | -2.5409110000 |
| H | 95.8711690000  | 62.1131780000 | -1.0285220000 |
| H | 96.8121300000  | 61.2541800000 | 1.0827200000  |
| H | 98.3177810000  | 59.7931480000 | -2.6648440000 |
| H | 98.3738560000  | 59.7883030000 | 2.2928640000  |
| H | 99.9639670000  | 58.3221630000 | 1.0226950000  |
| H | 99.9476480000  | 58.3724200000 | -1.4586490000 |
| N | 100.5570080000 | 63.1687570000 | 5.7608800000  |
| N | 101.4331560000 | 64.0585020000 | 5.8507200000  |
| O | 100.5236960000 | 62.1095120000 | -0.2107060000 |
| H | 101.7064370000 | 61.2904710000 | -0.3699360000 |
| H | 99.7047920000  | 61.5993250000 | -0.0846140000 |
| O | 102.6630550000 | 60.8310070000 | -0.5295330000 |
| H | 102.8819020000 | 59.9935530000 | 0.1674710000  |
| H | 103.3335480000 | 61.5321250000 | -0.3730650000 |

$E'_{N2H}$

$E=-7528.306758$  solv=-0.125370 disp=234.64 Z0=918.78

|    |                |               |              |
|----|----------------|---------------|--------------|
| V  | 99.4889283819  | 62.3865140655 | 7.2644776603 |
| Fe | 105.4745063142 | 60.0058602941 | 2.1156299928 |
| Fe | 102.6803135931 | 61.4736939212 | 2.7701519415 |
| Fe | 105.2179105166 | 61.1689452225 | 4.7530109016 |
| Fe | 103.0425993544 | 58.9536144643 | 3.7710034593 |
| Fe | 100.1913289681 | 59.8400073249 | 5.8905838135 |
| Fe | 100.3222490055 | 62.1053912924 | 4.3882298811 |
| Fe | 102.6498475678 | 61.0984148540 | 5.6337428791 |
| C  | 101.5501331351 | 60.3773434469 | 4.2029944953 |

|   |                |               |               |
|---|----------------|---------------|---------------|
| S | 105.3193537001 | 58.9371609574 | 4.6297142801  |
| S | 104.7333193488 | 62.3540524762 | 6.7802532187  |
| S | 105.0407827976 | 62.3373683191 | 2.8263136274  |
| S | 103.1856253411 | 59.4784598273 | 1.4811928418  |
| S | 101.1124572371 | 63.3630115118 | 2.4343674445  |
| S | 98.2968351805  | 61.1854347063 | 5.3003235262  |
| S | 101.4051846351 | 60.6753682018 | 7.6746346500  |
| C | 100.8467998831 | 57.1759366083 | 4.5799794030  |
| O | 102.1191794439 | 57.2217402803 | 4.6091087388  |
| O | 100.0574673987 | 57.7691772934 | 5.3667100203  |
| O | 100.2731092166 | 56.3955404686 | 3.6407636232  |
| C | 97.6597542720  | 66.1940523116 | 5.4676678465  |
| C | 98.6539376361  | 66.2138104738 | 6.6626014858  |
| C | 98.3345365944  | 65.2082864592 | 7.8082165701  |
| C | 97.1186856999  | 65.6956835710 | 8.6256284824  |
| C | 96.7406463741  | 64.7532377366 | 9.8003824264  |
| C | 95.2679302591  | 64.4454877275 | 9.8432464474  |
| C | 99.5586107802  | 65.0228114831 | 8.7343604386  |
| O | 97.0875096792  | 65.0449053704 | 5.2459125736  |
| O | 97.5160278792  | 67.2057639078 | 4.7780722504  |
| O | 94.6701606059  | 64.7630964885 | 11.0079568995 |
| O | 94.6349333097  | 63.9395561900 | 8.9235001050  |
| O | 100.0544697524 | 63.8161433482 | 8.7781263540  |
| O | 99.9957294564  | 65.9867531327 | 9.3699762560  |
| O | 98.0205804164  | 63.9275116473 | 7.2295897260  |
| H | 97.6699515390  | 64.2036486750 | 6.2897115335  |
| H | 99.6404796682  | 65.9681041886 | 6.2519868491  |
| H | 98.7175274504  | 67.2283844070 | 7.0612168125  |
| H | 97.3406636829  | 66.6931340895 | 9.0146662869  |
| H | 96.2781689122  | 65.7894257567 | 7.9294976009  |
| H | 97.2367941073  | 63.7857527637 | 9.6601242034  |
| H | 97.0673129047  | 65.1612063219 | 10.7586823720 |
| C | 106.7058250850 | 57.1873633482 | 1.3300716616  |
| H | 105.8230716822 | 56.9608434104 | 0.7244037662  |
| H | 106.4738203381 | 57.0035232734 | 2.3826376646  |
| S | 107.2323079774 | 58.9466718576 | 1.0847659557  |
| C | 93.8214366816  | 61.0006872844 | 1.9037368006  |
| C | 93.5807142640  | 61.0991310576 | 3.4122421519  |
| C | 94.5853309353  | 62.0829499087 | 4.0264295535  |
| C | 94.3564200971  | 62.3546341245 | 5.5085014183  |
| N | 95.5367024743  | 63.0650203710 | 6.0876055569  |
| C | 93.0790263092  | 59.8959599939 | 1.1410742737  |
| H | 94.8955174975  | 60.8539014393 | 1.7371776904  |
| H | 93.5835649875  | 61.9730497227 | 1.4504782020  |

|   |                |               |               |
|---|----------------|---------------|---------------|
| H | 93.7028362654  | 60.1123677393 | 3.8828173461  |
| H | 92.5467131825  | 61.4181777971 | 3.6141498776  |
| H | 95.5979123962  | 61.6793332859 | 3.8981671784  |
| H | 94.5600448957  | 63.0343447632 | 3.4784336269  |
| H | 94.2366862281  | 61.4214753542 | 6.0697241951  |
| H | 93.4729455398  | 62.9734028430 | 5.6920087969  |
| H | 95.4160785206  | 63.2957347626 | 7.0881027870  |
| H | 96.3956896732  | 62.4806638619 | 5.9743215961  |
| H | 95.7900296991  | 63.9580146511 | 5.5967831162  |
| H | 91.9892861606  | 59.9641275550 | 1.2457224917  |
| H | 93.4048998805  | 58.9145809172 | 1.4526838642  |
| C | 100.0989993937 | 60.0520005043 | 10.8889969228 |
| C | 99.2299798820  | 61.3250555786 | 10.7398003419 |
| C | 97.9850250017  | 61.0984683112 | 9.9609963299  |
| N | 97.9571011232  | 61.2167223052 | 8.5856559469  |
| C | 96.7770315379  | 60.6169653817 | 10.4051161908 |
| C | 96.7700816977  | 60.7790965113 | 8.2012802017  |
| N | 96.0155543007  | 60.4165110905 | 9.2686882566  |
| H | 100.7720112776 | 59.8784110622 | 10.1700240961 |
| H | 99.4601244231  | 59.1681102027 | 11.0158442008 |
| H | 100.5712425857 | 60.2159540459 | 11.7550862176 |
| H | 98.9478313171  | 61.6529365861 | 11.7494990221 |
| H | 99.8061381106  | 62.1365839360 | 10.2889304532 |
| H | 96.4126985111  | 60.3832451785 | 11.3936885239 |
| H | 95.0846660316  | 60.0286923982 | 9.2280061489  |
| H | 96.4631005625  | 60.6582846652 | 7.1747171201  |
| C | 101.6500023662 | 56.1420046415 | 7.7050009646  |
| N | 102.7829140244 | 57.0137261724 | 7.3815775159  |
| C | 103.3461842868 | 57.8841714885 | 8.2069972031  |
| N | 102.8965557052 | 57.9842516281 | 9.4940805706  |
| N | 104.4362120085 | 58.5752005076 | 7.8373930333  |
| H | 101.7346880728 | 55.2579155922 | 7.0651029314  |
| H | 100.7886343400 | 56.5995589497 | 7.4843453987  |
| H | 101.6262278707 | 55.8261444120 | 8.6535098012  |
| H | 102.8901130588 | 57.1854064364 | 6.3746340188  |
| H | 103.3432371643 | 58.7083497823 | 10.0426117887 |
| H | 101.8867256606 | 58.0183234899 | 9.5819045368  |
| H | 104.7545089480 | 58.5292885231 | 6.8552591632  |
| H | 104.5530912312 | 59.4970134198 | 8.2422466415  |
| C | 104.8710003563 | 65.5940000768 | -4.0429939310 |
| C | 104.5904390262 | 64.1007511720 | -3.7644383544 |
| C | 104.0356484381 | 63.8610180939 | -2.3997093933 |
| N | 102.7453433411 | 64.2315926355 | -2.0740303771 |
| C | 104.6777614404 | 63.3530398364 | -1.2950577192 |

|   |                |               |               |
|---|----------------|---------------|---------------|
| C | 102.6167368766 | 63.9463661195 | -0.7942252826 |
| N | 103.7589612720 | 63.4179961280 | -0.2722165733 |
| H | 105.4142236009 | 65.9758309969 | -3.2952589453 |
| H | 103.9358771175 | 66.1566868796 | -4.1285100717 |
| H | 105.3923872632 | 65.6470933406 | -4.8946699416 |
| H | 105.5270093226 | 63.5370275410 | -3.8730618132 |
| H | 103.8989229942 | 63.7106083015 | -4.5229575999 |
| H | 105.6705769946 | 62.9556288876 | -1.1452086662 |
| H | 103.9117004034 | 63.1124309811 | 0.6823222744  |
| H | 101.7278333732 | 64.0935475537 | -0.2002564580 |
| C | 95.6299754317  | 57.4820327609 | 6.4910616685  |
| C | 97.0670888310  | 57.3342252994 | 7.0046141676  |
| O | 97.7551719877  | 56.3755738986 | 6.2079997411  |
| C | 97.1133828822  | 56.8787374458 | 8.4648995556  |
| H | 95.0638305697  | 58.2112683588 | 7.0892397628  |
| H | 98.1510045334  | 56.8213127910 | 8.8121514351  |
| H | 96.6680123470  | 55.8811366275 | 8.5618454019  |
| H | 96.5700030063  | 57.5683517710 | 9.1227276455  |
| H | 95.1083214299  | 56.5189502850 | 6.5543289854  |
| H | 98.4542775657  | 56.8451877007 | 5.7143646184  |
| H | 97.5675645615  | 58.3092626455 | 6.9222395194  |
| C | 98.4859997138  | 66.3580011999 | -1.7130009289 |
| C | 98.8192614068  | 65.6308648310 | -0.3941325512 |
| C | 98.1549813446  | 66.1870876388 | 0.8719823595  |
| C | 96.6970155257  | 65.7702472018 | 1.0810509892  |
| O | 96.0780622270  | 65.0336566484 | 0.3126881641  |
| N | 96.1153957856  | 66.3064176252 | 2.1992566627  |
| H | 98.7144619950  | 67.3289719260 | -1.6420949715 |
| H | 97.4197982233  | 66.2559178659 | -1.9472682953 |
| H | 99.0290071076  | 65.9401255986 | -2.4413702628 |
| H | 98.5616843012  | 64.5701146707 | -0.4884683114 |
| H | 99.9062146214  | 65.6798489037 | -0.2487509118 |
| H | 98.7129970943  | 65.8496956864 | 1.7570559651  |
| H | 98.2075231306  | 67.2851387401 | 0.8953133708  |
| H | 96.6668379971  | 66.6556371382 | 2.9879507182  |
| H | 95.2149373827  | 65.9120323119 | 2.4383465995  |
| C | 103.6859932634 | 68.3259926243 | 12.1929979453 |
| C | 104.3516434663 | 68.5438451267 | 10.8183057698 |
| C | 103.7077389856 | 67.7462414185 | 9.6658589623  |
| C | 103.4897900913 | 66.2430916926 | 9.9276614831  |
| C | 103.1734875615 | 65.5164877382 | 8.6215138435  |
| N | 102.7171663244 | 64.1001869847 | 8.8410763864  |
| H | 104.1085748799 | 67.5601821905 | 12.6777191146 |
| H | 102.6241505961 | 68.0763060563 | 12.0533477481 |

|   |                |               |               |
|---|----------------|---------------|---------------|
| H | 103.6948491636 | 69.1366814795 | 12.7784183029 |
| H | 104.3141791921 | 69.6061947119 | 10.5460618305 |
| H | 105.4189374461 | 68.2900447154 | 10.8861335959 |
| H | 102.7305495303 | 68.1852488160 | 9.4246424099  |
| H | 104.3303155436 | 67.8711517353 | 8.7683825275  |
| H | 104.3857705399 | 65.7990815526 | 10.3888295912 |
| H | 102.6527839169 | 66.1077652428 | 10.6222912134 |
| H | 102.3663882754 | 65.9997935994 | 8.0729056732  |
| H | 104.0559925688 | 65.4727820566 | 7.9767738364  |
| H | 103.2073965043 | 63.6603418285 | 9.6234036129  |
| H | 101.6605225251 | 64.0265674324 | 8.9845364329  |
| H | 102.9149236872 | 63.5195155534 | 8.0093846888  |
| H | 93.7296728267  | 64.5172416400 | 10.9103604083 |
| H | 95.6198513773  | 57.7972834039 | 5.4686067653  |
| H | 93.3471301324  | 60.0483404375 | 0.1060381924  |
| H | 107.5224147836 | 56.5249257589 | 1.0242611368  |
| H | 100.9962070651 | 56.0439576141 | 3.0895825170  |
| H | 100.8572495113 | 59.8877005037 | 3.4932590368  |
| H | 100.3192328490 | 62.7082515597 | 1.5569609879  |
| H | 104.7980349975 | 63.5069501214 | 6.0746084647  |
| H | 101.9887134358 | 64.4943438409 | 5.1399239929  |
| H | 94.8291928409  | 59.8672864785 | -1.0815082568 |
| C | 95.2420430022  | 60.2379261311 | -2.0081039642 |
| H | 95.8060990000  | 59.4731290000 | -2.5212650000 |
| C | 96.1878473518  | 61.4291942443 | -1.7406846085 |
| C | 97.3948703936  | 60.9770728006 | -0.9501397887 |
| C | 98.4031649604  | 60.2202726838 | -1.5670453658 |
| C | 97.5036813374  | 61.2404388875 | 0.4210160457  |
| C | 99.4814217474  | 59.7287241098 | -0.8339300646 |
| C | 98.5674513806  | 60.7262045199 | 1.1680141603  |
| C | 99.5597981782  | 59.9674337087 | 0.5408673050  |
| H | 94.4063331776  | 60.5384262846 | -2.6536641146 |
| H | 96.5096690156  | 61.8522615420 | -2.7017834755 |
| H | 95.6702935672  | 62.2328629710 | -1.2042417611 |
| H | 96.7607291422  | 61.8722973456 | 0.9005645299  |
| H | 98.3478463939  | 60.0271622638 | -2.6372180283 |
| H | 98.6138980510  | 60.9210231198 | 2.2372080690  |
| H | 100.4085842099 | 59.5821435477 | 1.0962531638  |
| H | 100.2680033775 | 59.1646173581 | -1.3277749867 |
| N | 100.7419206851 | 63.3135925381 | 5.9159626573  |
| N | 101.4985035521 | 64.3060251166 | 6.0454493937  |

TS<sub>N2H2</sub>

E=-7528.281644 solv=-0.135461 disp=-230.20 Z0=918.22

|    |                |               |               |
|----|----------------|---------------|---------------|
| V  | 99.4909310000  | 62.3243550000 | 7.1456530000  |
| Fe | 105.3990860000 | 59.8281670000 | 2.4438320000  |
| Fe | 102.6219620000 | 61.2518510000 | 2.6343440000  |
| Fe | 104.9135740000 | 61.4426650000 | 4.8435320000  |
| Fe | 102.7751790000 | 58.6810750000 | 3.6653220000  |
| Fe | 99.9030710000  | 59.7393120000 | 5.6379680000  |
| Fe | 100.3822610000 | 62.0661140000 | 4.2720780000  |
| Fe | 102.5011360000 | 60.6140630000 | 5.6741710000  |
| C  | 101.4016460000 | 60.2966020000 | 4.0719700000  |
| S  | 104.7524140000 | 59.1354500000 | 5.0414050000  |
| S  | 104.0835940000 | 62.4564200000 | 6.7942340000  |
| S  | 104.9604480000 | 62.1949370000 | 2.7331010000  |
| S  | 103.2478160000 | 59.2043080000 | 1.4699510000  |
| S  | 100.9316130000 | 62.9678990000 | 2.0852510000  |
| S  | 98.2288660000  | 61.3791380000 | 5.1191300000  |
| S  | 101.0594290000 | 60.2431600000 | 7.5539050000  |
| C  | 100.5233050000 | 56.9274020000 | 4.4889170000  |
| O  | 101.7882190000 | 57.0307540000 | 4.4724620000  |
| O  | 99.6786940000  | 57.7376690000 | 4.9550850000  |
| O  | 99.9961910000  | 55.7914370000 | 3.9669760000  |
| C  | 97.7911870000  | 66.4119690000 | 5.6459610000  |
| C  | 98.7697680000  | 66.3184670000 | 6.8544160000  |
| C  | 98.4306300000  | 65.2030760000 | 7.8885350000  |
| C  | 97.2087560000  | 65.6462440000 | 8.7279220000  |
| C  | 96.7654070000  | 64.6153930000 | 9.7987610000  |
| C  | 95.2679300000  | 64.4454880000 | 9.8432460000  |
| C  | 99.6385680000  | 64.9139990000 | 8.8040560000  |
| O  | 97.2403560000  | 65.2832550000 | 5.2962970000  |
| O  | 97.6430780000  | 67.4860390000 | 5.0652480000  |
| O  | 94.7080340000  | 64.7126750000 | 11.0388110000 |
| O  | 94.5942590000  | 64.0825990000 | 8.8878080000  |
| O  | 100.1432410000 | 63.7143820000 | 8.7222010000  |
| O  | 100.0716720000 | 65.8046620000 | 9.5424400000  |
| O  | 98.1182620000  | 63.9914880000 | 7.1838830000  |
| H  | 97.7724510000  | 64.3556480000 | 6.2685970000  |
| H  | 99.7641730000  | 66.1271830000 | 6.4315830000  |
| H  | 98.8201500000  | 67.2894570000 | 7.3512980000  |
| H  | 97.4512340000  | 66.5955530000 | 9.2133930000  |
| H  | 96.3888750000  | 65.8333220000 | 8.0256550000  |
| H  | 97.1613610000  | 63.6303460000 | 9.5267330000  |
| H  | 97.1506840000  | 64.8768360000 | 10.7863660000 |
| C  | 106.8117920000 | 57.0539850000 | 1.6657590000  |
| H  | 105.8147190000 | 56.9794180000 | 1.2221260000  |

|   |                |               |               |
|---|----------------|---------------|---------------|
| H | 106.8027790000 | 56.5759560000 | 2.6503420000  |
| S | 107.3500120000 | 58.8176120000 | 1.8000610000  |
| C | 93.8219230000  | 61.0296390000 | 1.8672210000  |
| C | 93.5933130000  | 61.2087340000 | 3.3701600000  |
| C | 94.5703220000  | 62.2654790000 | 3.9085710000  |
| C | 94.3637120000  | 62.5989570000 | 5.3827140000  |
| N | 95.5721240000  | 63.2839730000 | 5.9382200000  |
| C | 93.0790260000  | 59.8959600000 | 1.1410740000  |
| H | 94.8985770000  | 60.8884410000 | 1.7010240000  |
| H | 93.5734430000  | 61.9779060000 | 1.3707330000  |
| H | 93.7572290000  | 60.2579610000 | 3.8985500000  |
| H | 92.5506760000  | 61.5029670000 | 3.5639070000  |
| H | 95.5941240000  | 61.8934810000 | 3.7756030000  |
| H | 94.4935660000  | 63.1851150000 | 3.3136280000  |
| H | 94.2234610000  | 61.6894850000 | 5.9768010000  |
| H | 93.5004510000  | 63.2486690000 | 5.5539000000  |
| H | 95.4726120000  | 63.4914550000 | 6.9441280000  |
| H | 96.4172960000  | 62.6766860000 | 5.7973910000  |
| H | 95.8379730000  | 64.1814590000 | 5.4691590000  |
| H | 91.9899560000  | 59.9657090000 | 1.2472760000  |
| H | 93.4049000000  | 58.9145810000 | 1.4526840000  |
| C | 100.0989990000 | 60.0520010000 | 10.8889970000 |
| C | 99.2117240000  | 61.2968020000 | 10.6542370000 |
| C | 97.9776210000  | 61.0282910000 | 9.8585870000  |
| N | 97.9258380000  | 61.2413520000 | 8.4930570000  |
| C | 96.7806900000  | 60.4974880000 | 10.2799260000 |
| C | 96.7378570000  | 60.8233680000 | 8.0939390000  |
| N | 96.0034940000  | 60.3742190000 | 9.1438280000  |
| H | 100.7720110000 | 59.8784110000 | 10.1700240000 |
| H | 99.4760280000  | 59.1564610000 | 11.0177790000 |
| H | 100.5712430000 | 60.2159540000 | 11.7550860000 |
| H | 98.9158760000  | 61.6980840000 | 11.6328740000 |
| H | 99.7885330000  | 62.0709440000 | 10.1432940000 |
| H | 96.4268440000  | 60.1983280000 | 11.2550200000 |
| H | 95.0793140000  | 59.9726420000 | 9.0882430000  |
| H | 96.4151170000  | 60.7784190000 | 7.0655030000  |
| C | 101.6500030000 | 56.1420050000 | 7.7050010000  |
| N | 102.7834780000 | 57.0457330000 | 7.4864200000  |
| C | 103.2520320000 | 57.8777970000 | 8.4073010000  |
| N | 102.6862370000 | 57.8800990000 | 9.6512290000  |
| N | 104.3512330000 | 58.6171600000 | 8.1837270000  |
| H | 101.7756340000 | 55.2798710000 | 7.0456250000  |
| H | 100.7886340000 | 56.5995590000 | 7.4843450000  |
| H | 101.6262280000 | 55.8261440000 | 8.6535100000  |

|   |                |               |               |
|---|----------------|---------------|---------------|
| H | 103.0101650000 | 57.2583500000 | 6.5150370000  |
| H | 103.0923310000 | 58.5447260000 | 10.2975350000 |
| H | 101.6727280000 | 57.9264900000 | 9.6460870000  |
| H | 104.6939100000 | 58.6600990000 | 7.2078090000  |
| H | 104.3548380000 | 59.5363420000 | 8.6137100000  |
| C | 104.8710000000 | 65.5940000000 | -4.0429940000 |
| C | 104.5065920000 | 64.1303100000 | -3.7274610000 |
| C | 103.9720350000 | 63.9918970000 | -2.3372880000 |
| N | 102.8283270000 | 64.6579350000 | -1.9366960000 |
| C | 104.5342180000 | 63.3317690000 | -1.2695980000 |
| C | 102.7082100000 | 64.3960190000 | -0.6492040000 |
| N | 103.7148740000 | 63.6001060000 | -0.1967840000 |
| H | 105.4142240000 | 65.9758310000 | -3.2952590000 |
| H | 103.9584170000 | 66.1930780000 | -4.1342430000 |
| H | 105.3923870000 | 65.6470930000 | -4.8946700000 |
| H | 105.3963320000 | 63.4953620000 | -3.8341220000 |
| H | 103.7732780000 | 63.7685830000 | -4.4620090000 |
| H | 105.4173870000 | 62.7178520000 | -1.1723900000 |
| H | 103.8472540000 | 63.2583650000 | 0.7491930000  |
| H | 101.9173880000 | 64.7372460000 | 0.0016170000  |
| C | 95.6299760000  | 57.4820330000 | 6.4910620000  |
| C | 97.0301460000  | 57.2813030000 | 7.0851030000  |
| O | 97.7579730000  | 56.2974670000 | 6.3653810000  |
| C | 96.9488960000  | 56.8077770000 | 8.5380960000  |
| H | 95.0659670000  | 58.2280600000 | 7.0714240000  |
| H | 97.9552650000  | 56.7010560000 | 8.9567320000  |
| H | 96.4549630000  | 55.8295070000 | 8.5853530000  |
| H | 96.3885850000  | 57.5121490000 | 9.1636800000  |
| H | 95.0734370000  | 56.5374230000 | 6.5474920000  |
| H | 98.2628900000  | 56.7574030000 | 5.6662470000  |
| H | 97.5697690000  | 58.2408530000 | 7.0582690000  |
| C | 98.4860000000  | 66.3580010000 | -1.7130010000 |
| C | 98.7727640000  | 65.6287410000 | -0.3848770000 |
| C | 98.2769440000  | 66.3236430000 | 0.8906630000  |
| C | 96.7633880000  | 66.3003330000 | 1.1030330000  |
| O | 95.9719480000  | 65.8143820000 | 0.2966940000  |
| N | 96.3355880000  | 66.8997590000 | 2.2584710000  |
| H | 98.7144620000  | 67.3289720000 | -1.6420950000 |
| H | 97.4210440000  | 66.2796250000 | -1.9588950000 |
| H | 99.0290070000  | 65.9401260000 | -2.4413700000 |
| H | 98.3555450000  | 64.6161810000 | -0.4263490000 |
| H | 99.8574800000  | 65.5067410000 | -0.2840770000 |
| H | 98.7444050000  | 65.8494970000 | 1.7651090000  |
| H | 98.6067030000  | 67.3730000000 | 0.9117890000  |



|   |                |               |               |
|---|----------------|---------------|---------------|
| H | 96.9363960000  | 67.0747090000 | 3.0641660000  |
| H | 95.3513800000  | 66.7878220000 | 2.4611790000  |
| C | 103.6859930000 | 68.3259920000 | 12.1929980000 |
| C | 104.3538300000 | 68.5401750000 | 10.8199490000 |
| C | 103.7489030000 | 67.6745950000 | 9.6956980000  |
| C | 103.5204690000 | 66.2003030000 | 10.0739290000 |
| C | 103.2265750000 | 65.3443870000 | 8.8458550000  |
| N | 102.7532640000 | 63.9640710000 | 9.2301150000  |
| H | 104.1085750000 | 67.5601820000 | 12.6777190000 |
| H | 102.6237560000 | 68.0782000000 | 12.0538270000 |
| H | 103.6948490000 | 69.1366820000 | 12.7784180000 |
| H | 104.2720520000 | 69.5918450000 | 10.5186310000 |
| H | 105.4298220000 | 68.3324980000 | 10.9030180000 |
| H | 102.7795840000 | 68.0957310000 | 9.3975260000  |
| H | 104.3971830000 | 67.7334990000 | 8.8106890000  |
| H | 104.4030350000 | 65.7979940000 | 10.5955780000 |
| H | 102.6659540000 | 66.1300200000 | 10.7566900000 |
| H | 102.4325520000 | 65.7829850000 | 8.2400730000  |
| H | 104.1121520000 | 65.2149790000 | 8.2184240000  |
| H | 103.0524330000 | 63.7219520000 | 10.1768700000 |
| H | 101.6848450000 | 63.8699230000 | 9.1587820000  |
| H | 103.1599340000 | 63.2600390000 | 8.5748770000  |
| H | 93.7483440000  | 64.5654060000 | 10.9304830000 |
| H | 95.6198510000  | 57.7972830000 | 5.4686070000  |
| H | 93.3471300000  | 60.0483410000 | 0.1060380000  |
| H | 107.5224150000 | 56.5249260000 | 1.0242610000  |
| H | 100.7443240000 | 55.2855530000 | 3.6054270000  |
| H | 100.6517070000 | 59.8533650000 | 3.3864770000  |
| H | 100.2841820000 | 62.0860750000 | 1.2884690000  |
| H | 102.8935140000 | 63.0179400000 | 6.2993060000  |
| H | 99.7802800000  | 64.3637990000 | 4.9657320000  |
| H | 94.8291930000  | 59.8672860000 | -1.0815090000 |
| C | 95.2420430000  | 60.2379260000 | -2.0081040000 |
| H | 95.8060990000  | 59.4731290000 | -2.5212650000 |
| C | 96.1757610000  | 61.4460760000 | -1.7653970000 |
| C | 97.5569060000  | 61.0207840000 | -1.3054050000 |
| C | 98.6904830000  | 61.3394660000 | -2.0650670000 |
| C | 97.7333180000  | 60.2579540000 | -0.1414380000 |
| C | 99.9619640000  | 60.9067150000 | -1.6829990000 |
| C | 99.0007040000  | 59.8166190000 | 0.2419290000  |
| C | 100.1227490000 | 60.1344800000 | -0.5308040000 |
| H | 94.3919590000  | 60.5266160000 | -2.6403130000 |
| H | 96.2784750000  | 62.0150580000 | -2.6969400000 |
| H | 95.7217060000  | 62.1355600000 | -1.0408100000 |

|   |                |               |               |
|---|----------------|---------------|---------------|
| H | 96.8705750000  | 60.0004640000 | 0.4696850000  |
| H | 98.5744460000  | 61.9369160000 | -2.9670270000 |
| H | 99.1159720000  | 59.2262450000 | 1.1479700000  |
| H | 101.1085910000 | 59.7963780000 | -0.2251210000 |
| H | 100.8285400000 | 61.1764950000 | -2.2807620000 |
| N | 100.9635660000 | 63.2041050000 | 5.9646080000  |
| N | 100.7955600000 | 64.1057730000 | 5.0555680000  |

$E_{N_2H_2}$

$E=-7528.335585$  solv=-0.129783 disp=-234.78 Z0=922.44

|    |                |               |               |
|----|----------------|---------------|---------------|
| V  | 99.4578179579  | 62.2262197521 | 7.2656577066  |
| Fe | 105.5401332799 | 59.9562738818 | 2.5275254295  |
| Fe | 102.8874155849 | 61.4691081972 | 2.9405399951  |
| Fe | 105.1424233895 | 61.2027714011 | 5.2232172877  |
| Fe | 103.0266761896 | 58.8022286048 | 3.6954689721  |
| Fe | 100.0134929251 | 59.8064940050 | 5.5575617582  |
| Fe | 100.4683972816 | 62.1820157830 | 4.4076148508  |
| Fe | 102.6201312624 | 60.5754620189 | 5.9187927983  |
| C  | 101.5675402639 | 60.4130464657 | 4.2439904652  |
| S  | 105.0953626402 | 58.8829154033 | 4.8774831663  |
| S  | 104.2779579828 | 61.7665540877 | 7.2706408441  |
| S  | 105.1838462711 | 62.2653389524 | 3.1925909113  |
| S  | 103.3027998398 | 59.5504367454 | 1.5278472865  |
| S  | 101.1426386256 | 63.0445529192 | 2.2181903759  |
| S  | 98.3000157802  | 61.3701496130 | 5.1384677151  |
| S  | 100.9612385834 | 60.1324017324 | 7.5945391631  |
| C  | 100.6365270329 | 57.0429564189 | 4.4620020851  |
| O  | 101.8946830223 | 57.1752378040 | 4.4442734115  |
| O  | 99.7636613173  | 57.8518755952 | 4.8925427229  |
| O  | 100.1308566046 | 55.8781555774 | 3.9882698956  |
| C  | 97.7519886878  | 66.2249760118 | 5.6244189337  |
| C  | 98.7820339233  | 66.1467522330 | 6.7881562324  |
| C  | 98.4461529690  | 65.1011793360 | 7.8932749996  |
| C  | 97.2387645794  | 65.5966844339 | 8.7238612316  |
| C  | 96.7669124334  | 64.6065593851 | 9.8240463367  |
| C  | 95.2679300971  | 64.4454876758 | 9.8432465503  |
| C  | 99.6748313049  | 64.8387923889 | 8.7975635899  |
| O  | 97.0874442076  | 65.1259475843 | 5.4088626781  |
| O  | 97.6657145757  | 67.2547289813 | 4.9532486759  |
| O  | 94.6834524370  | 64.8182449981 | 10.9969054541 |
| O  | 94.6070608499  | 64.0094442465 | 8.9070695681  |
| O  | 100.1514895306 | 63.6223927429 | 8.7794707404  |
| O  | 100.1496110102 | 65.7651454542 | 9.4636206495  |

|   |                |               |               |
|---|----------------|---------------|---------------|
| O | 98.1029070728  | 63.8590185401 | 7.2548395002  |
| H | 97.7213032875  | 64.1932642869 | 6.3450781163  |
| H | 99.7271334055  | 65.8575630784 | 6.3138033204  |
| H | 98.9148099548  | 67.1373944696 | 7.2282525858  |
| H | 97.5044513153  | 66.5536768887 | 9.1815684865  |
| H | 96.4252552254  | 65.7804702717 | 8.0142834736  |
| H | 97.1660103397  | 63.6108143973 | 9.6020111665  |
| H | 97.1266045245  | 64.9067437610 | 10.8101659964 |
| C | 106.7518556931 | 57.1460173682 | 1.4970689452  |
| H | 105.8116702837 | 57.0129424089 | 0.9535641744  |
| H | 106.6177058321 | 56.8107544455 | 2.5302831786  |
| S | 107.2879405458 | 58.9164424369 | 1.4482803249  |
| C | 93.8180678612  | 61.0108894142 | 1.8962838299  |
| C | 93.5565546994  | 61.1533104149 | 3.3983731745  |
| C | 94.5423384507  | 62.1684113917 | 3.9965385276  |
| C | 94.2978738557  | 62.4646034410 | 5.4728749627  |
| N | 95.4766303376  | 63.1650293736 | 6.0702064943  |
| C | 93.0790263338  | 59.8959600250 | 1.1410742960  |
| H | 94.8933585427  | 60.8528354029 | 1.7501450421  |
| H | 93.5945692592  | 61.9737613360 | 1.4162213240  |
| H | 93.6828056195  | 60.1831750099 | 3.9017714688  |
| H | 92.5167085323  | 61.4671191712 | 3.5766234327  |
| H | 95.5617309620  | 61.7781970836 | 3.8827021551  |
| H | 94.5063655767  | 63.1063445878 | 3.4266837135  |
| H | 94.1576837308  | 61.5397288588 | 6.0431413351  |
| H | 93.4192263088  | 63.0953179836 | 5.6372667457  |
| H | 95.3472592425  | 63.3754432782 | 7.0747225639  |
| H | 96.3339355201  | 62.5837234807 | 5.9502235048  |
| H | 95.7453316598  | 64.0699954385 | 5.6083703358  |
| H | 91.9890108788  | 59.9631609784 | 1.2433074196  |
| H | 93.4048998792  | 58.9145809170 | 1.4526838651  |
| C | 100.0989993525 | 60.0520003157 | 10.8889971567 |
| C | 99.1655671362  | 61.2683402732 | 10.7062723998 |
| C | 97.9505723780  | 60.9812345835 | 9.8900438087  |
| N | 97.9159658160  | 61.1704437213 | 8.5202571516  |
| C | 96.7592435108  | 60.4315783312 | 10.2978155697 |
| C | 96.7447899638  | 60.7194093970 | 8.1067914471  |
| N | 96.0032130013  | 60.2736458090 | 9.1513772075  |
| H | 100.7720112296 | 59.8784111984 | 10.1700240169 |
| H | 99.4972043589  | 59.1417500300 | 11.0202252850 |
| H | 100.5712426492 | 60.2159540498 | 11.7550861822 |
| H | 98.8354734566  | 61.5841932735 | 11.7053395990 |
| H | 99.7074278468  | 62.1100591795 | 10.2694126665 |
| H | 96.3982865711  | 60.1374619891 | 11.2712990082 |

|   |                |               |               |
|---|----------------|---------------|---------------|
| H | 95.0930414279  | 59.8424057075 | 9.0865097722  |
| H | 96.4397617101  | 60.6535697212 | 7.0744865633  |
| C | 101.6500024885 | 56.1420046990 | 7.7050011834  |
| N | 102.8194187993 | 56.9763555724 | 7.4376894542  |
| C | 103.3560079061 | 57.8282265069 | 8.3070569992  |
| N | 102.7822334013 | 57.9703510248 | 9.5370000593  |
| N | 104.5050168531 | 58.4634127380 | 8.0392496330  |
| H | 101.7314361698 | 55.2586557588 | 7.0634293481  |
| H | 100.7886343462 | 56.5995589446 | 7.4843453646  |
| H | 101.6262277526 | 55.8261443261 | 8.6535097697  |
| H | 103.0563831324 | 57.1136566611 | 6.4566041807  |
| H | 103.2399215189 | 58.6561370413 | 10.1255970083 |
| H | 101.7760653807 | 58.1049967196 | 9.5031930857  |
| H | 104.8896837477 | 58.3410815869 | 7.0916388709  |
| H | 104.5513534639 | 59.4578159328 | 8.2965347829  |
| C | 104.8710007112 | 65.5940001503 | -4.0429945709 |
| C | 104.6588690109 | 64.0706722048 | -3.8513959097 |
| C | 103.9530076818 | 63.6083112420 | -2.6164554294 |
| N | 102.6449864003 | 63.9635219742 | -2.3445410967 |
| C | 104.4092384868 | 62.7225933685 | -1.6666591798 |
| C | 102.3252935180 | 63.3007585780 | -1.2505106684 |
| N | 103.3569140795 | 62.5334554562 | -0.7982795198 |
| H | 105.4142234879 | 65.9758309265 | -3.2952588274 |
| H | 103.9189115828 | 66.1255491598 | -4.1266684354 |
| H | 105.3923871845 | 65.6470936124 | -4.8946699730 |
| H | 105.6426472864 | 63.5819588570 | -3.8850995346 |
| H | 104.1100688552 | 63.6977778071 | -4.7293061856 |
| H | 105.3520892906 | 62.2124929097 | -1.5363898094 |
| H | 103.3480058355 | 61.9092836760 | 0.0013530463  |
| H | 101.3732044209 | 63.3422482586 | -0.7414797710 |
| C | 95.6299754901  | 57.4820327146 | 6.4910616138  |
| C | 97.0563717154  | 57.2896027004 | 7.0276287281  |
| O | 97.7664749354  | 56.3439818877 | 6.2379538624  |
| C | 97.0517796808  | 56.7690436921 | 8.4656883779  |
| H | 95.0787458729  | 58.2255221229 | 7.0858491011  |
| H | 98.0767075249  | 56.6916011850 | 8.8432756613  |
| H | 96.5993141073  | 55.7703773374 | 8.4992571632  |
| H | 96.4882232741  | 57.4298675209 | 9.1350127727  |
| H | 95.0813281068  | 56.5337146004 | 6.5517717124  |
| H | 98.2951827575  | 56.8344666048 | 5.5796611388  |
| H | 97.5800260920  | 58.2564265089 | 7.0041765758  |
| C | 98.4859998040  | 66.3580011614 | -1.7130009451 |
| C | 98.8341157804  | 65.6154176905 | -0.4036779963 |
| C | 98.2481230662  | 66.1905377510 | 0.8921412220  |

|   |                |               |               |
|---|----------------|---------------|---------------|
| C | 96.8000218305  | 65.7935250166 | 1.1869905998  |
| O | 96.1377692006  | 65.0399956251 | 0.4730722235  |
| N | 96.2781573033  | 66.3625460509 | 2.3193523024  |
| H | 98.7144619771  | 67.3289719270 | -1.6420949272 |
| H | 97.4187159619  | 66.2573556062 | -1.9425020877 |
| H | 99.0290070742  | 65.9401256025 | -2.4413702903 |
| H | 98.5237834597  | 64.5679889020 | -0.4884327156 |
| H | 99.9267771666  | 65.6081439219 | -0.3000036697 |
| H | 98.8488524079  | 65.8459035774 | 1.7458010040  |
| H | 98.3188900800  | 67.2876096458 | 0.9064814217  |
| H | 96.8648729363  | 66.7164999797 | 3.0786500197  |
| H | 95.3920154200  | 65.9743242750 | 2.6151856989  |
| C | 103.6859932730 | 68.3259926261 | 12.1929980129 |
| C | 104.3540545328 | 68.5334190267 | 10.8185144810 |
| C | 103.7731880708 | 67.6491849449 | 9.6946930510  |
| C | 103.6470220543 | 66.1506159969 | 10.0254287502 |
| C | 103.2905374865 | 65.3362731641 | 8.7802215013  |
| N | 102.8834646440 | 63.9236198084 | 9.1159837653  |
| H | 104.1085748652 | 67.5601821898 | 12.6777191257 |
| H | 102.6243868591 | 68.0759385769 | 12.0508184220 |
| H | 103.6948491733 | 69.1366814983 | 12.7784182770 |
| H | 104.2515912223 | 69.5793109917 | 10.5030582547 |
| H | 105.4342171759 | 68.3505562777 | 10.9073789495 |
| H | 102.7715164599 | 68.0153567865 | 9.4323711967  |
| H | 104.3931396293 | 67.7731158230 | 8.7956413381  |
| H | 104.5863176215 | 65.7691491186 | 10.4540277087 |
| H | 102.8564098909 | 66.0100290684 | 10.7722323749 |
| H | 102.4427519542 | 65.7851811501 | 8.2611249236  |
| H | 104.1368171939 | 65.2671629507 | 8.0906773361  |
| H | 103.2382478910 | 63.6461282196 | 10.0338830302 |
| H | 101.8296073150 | 63.8049351958 | 9.1119917907  |
| H | 103.2941403994 | 63.2303119791 | 8.4205099988  |
| H | 93.7243997722  | 64.6734068264 | 10.8793474482 |
| H | 95.6198513341  | 57.7972834485 | 5.4686067793  |
| H | 93.3471300201  | 60.0483402920 | 0.1060380840  |
| H | 107.5224148380 | 56.5249255732 | 1.0242612083  |
| H | 100.8882875633 | 55.3695548033 | 3.6504265988  |
| H | 100.9519969474 | 59.9475722706 | 3.4501526713  |
| H | 100.5355098904 | 62.0826565322 | 1.4851435656  |
| H | 102.0401087323 | 62.9592975644 | 6.3189395746  |
| H | 101.7324207275 | 64.3983978273 | 4.7767438312  |
| H | 94.8291927582  | 59.8672867964 | -1.0815081646 |
| C | 95.2420430749  | 60.2379259882 | -2.0081038780 |
| H | 95.8060990000  | 59.4731290000 | -2.5212650000 |

|   |                |               |               |
|---|----------------|---------------|---------------|
| C | 96.2346813572  | 61.3859593932 | -1.7003378522 |
| C | 97.4024090977  | 60.8488132418 | -0.8963388563 |
| C | 98.3804529869  | 60.0507504363 | -1.5127817472 |
| C | 97.4899225373  | 61.0541847738 | 0.4857573044  |
| C | 99.4038666228  | 59.4628437721 | -0.7699433925 |
| C | 98.4992200561  | 60.4480414260 | 1.2415280467  |
| C | 99.4592378859  | 59.6477175582 | 0.6151216764  |
| H | 94.4195901979  | 60.5707048007 | -2.6535724013 |
| H | 96.5951375492  | 61.8145768745 | -2.6447909899 |
| H | 95.7447958798  | 62.2004224863 | -1.1542963384 |
| H | 96.7765528548  | 61.7154934101 | 0.9704603625  |
| H | 98.3425375589  | 59.8969132497 | -2.5898808877 |
| H | 98.5339920952  | 60.6166697731 | 2.3145439915  |
| H | 100.2652705146 | 59.1939598815 | 1.1844485921  |
| H | 100.1640780690 | 58.8652069058 | -1.2655621070 |
| N | 101.0460463772 | 63.1375157830 | 6.0972615426  |
| N | 100.8295370109 | 64.0726644863 | 5.1597171599  |
